# Supplementary material for: Comparative Genomic Analysis of Rice with Contrasting Photosynthesis and Grain Production under Salt Stress
Source: MDPI journal article supplement (doi:10.3390/genes10080562), 2019-07-25
Supplement: s1 [file s1]

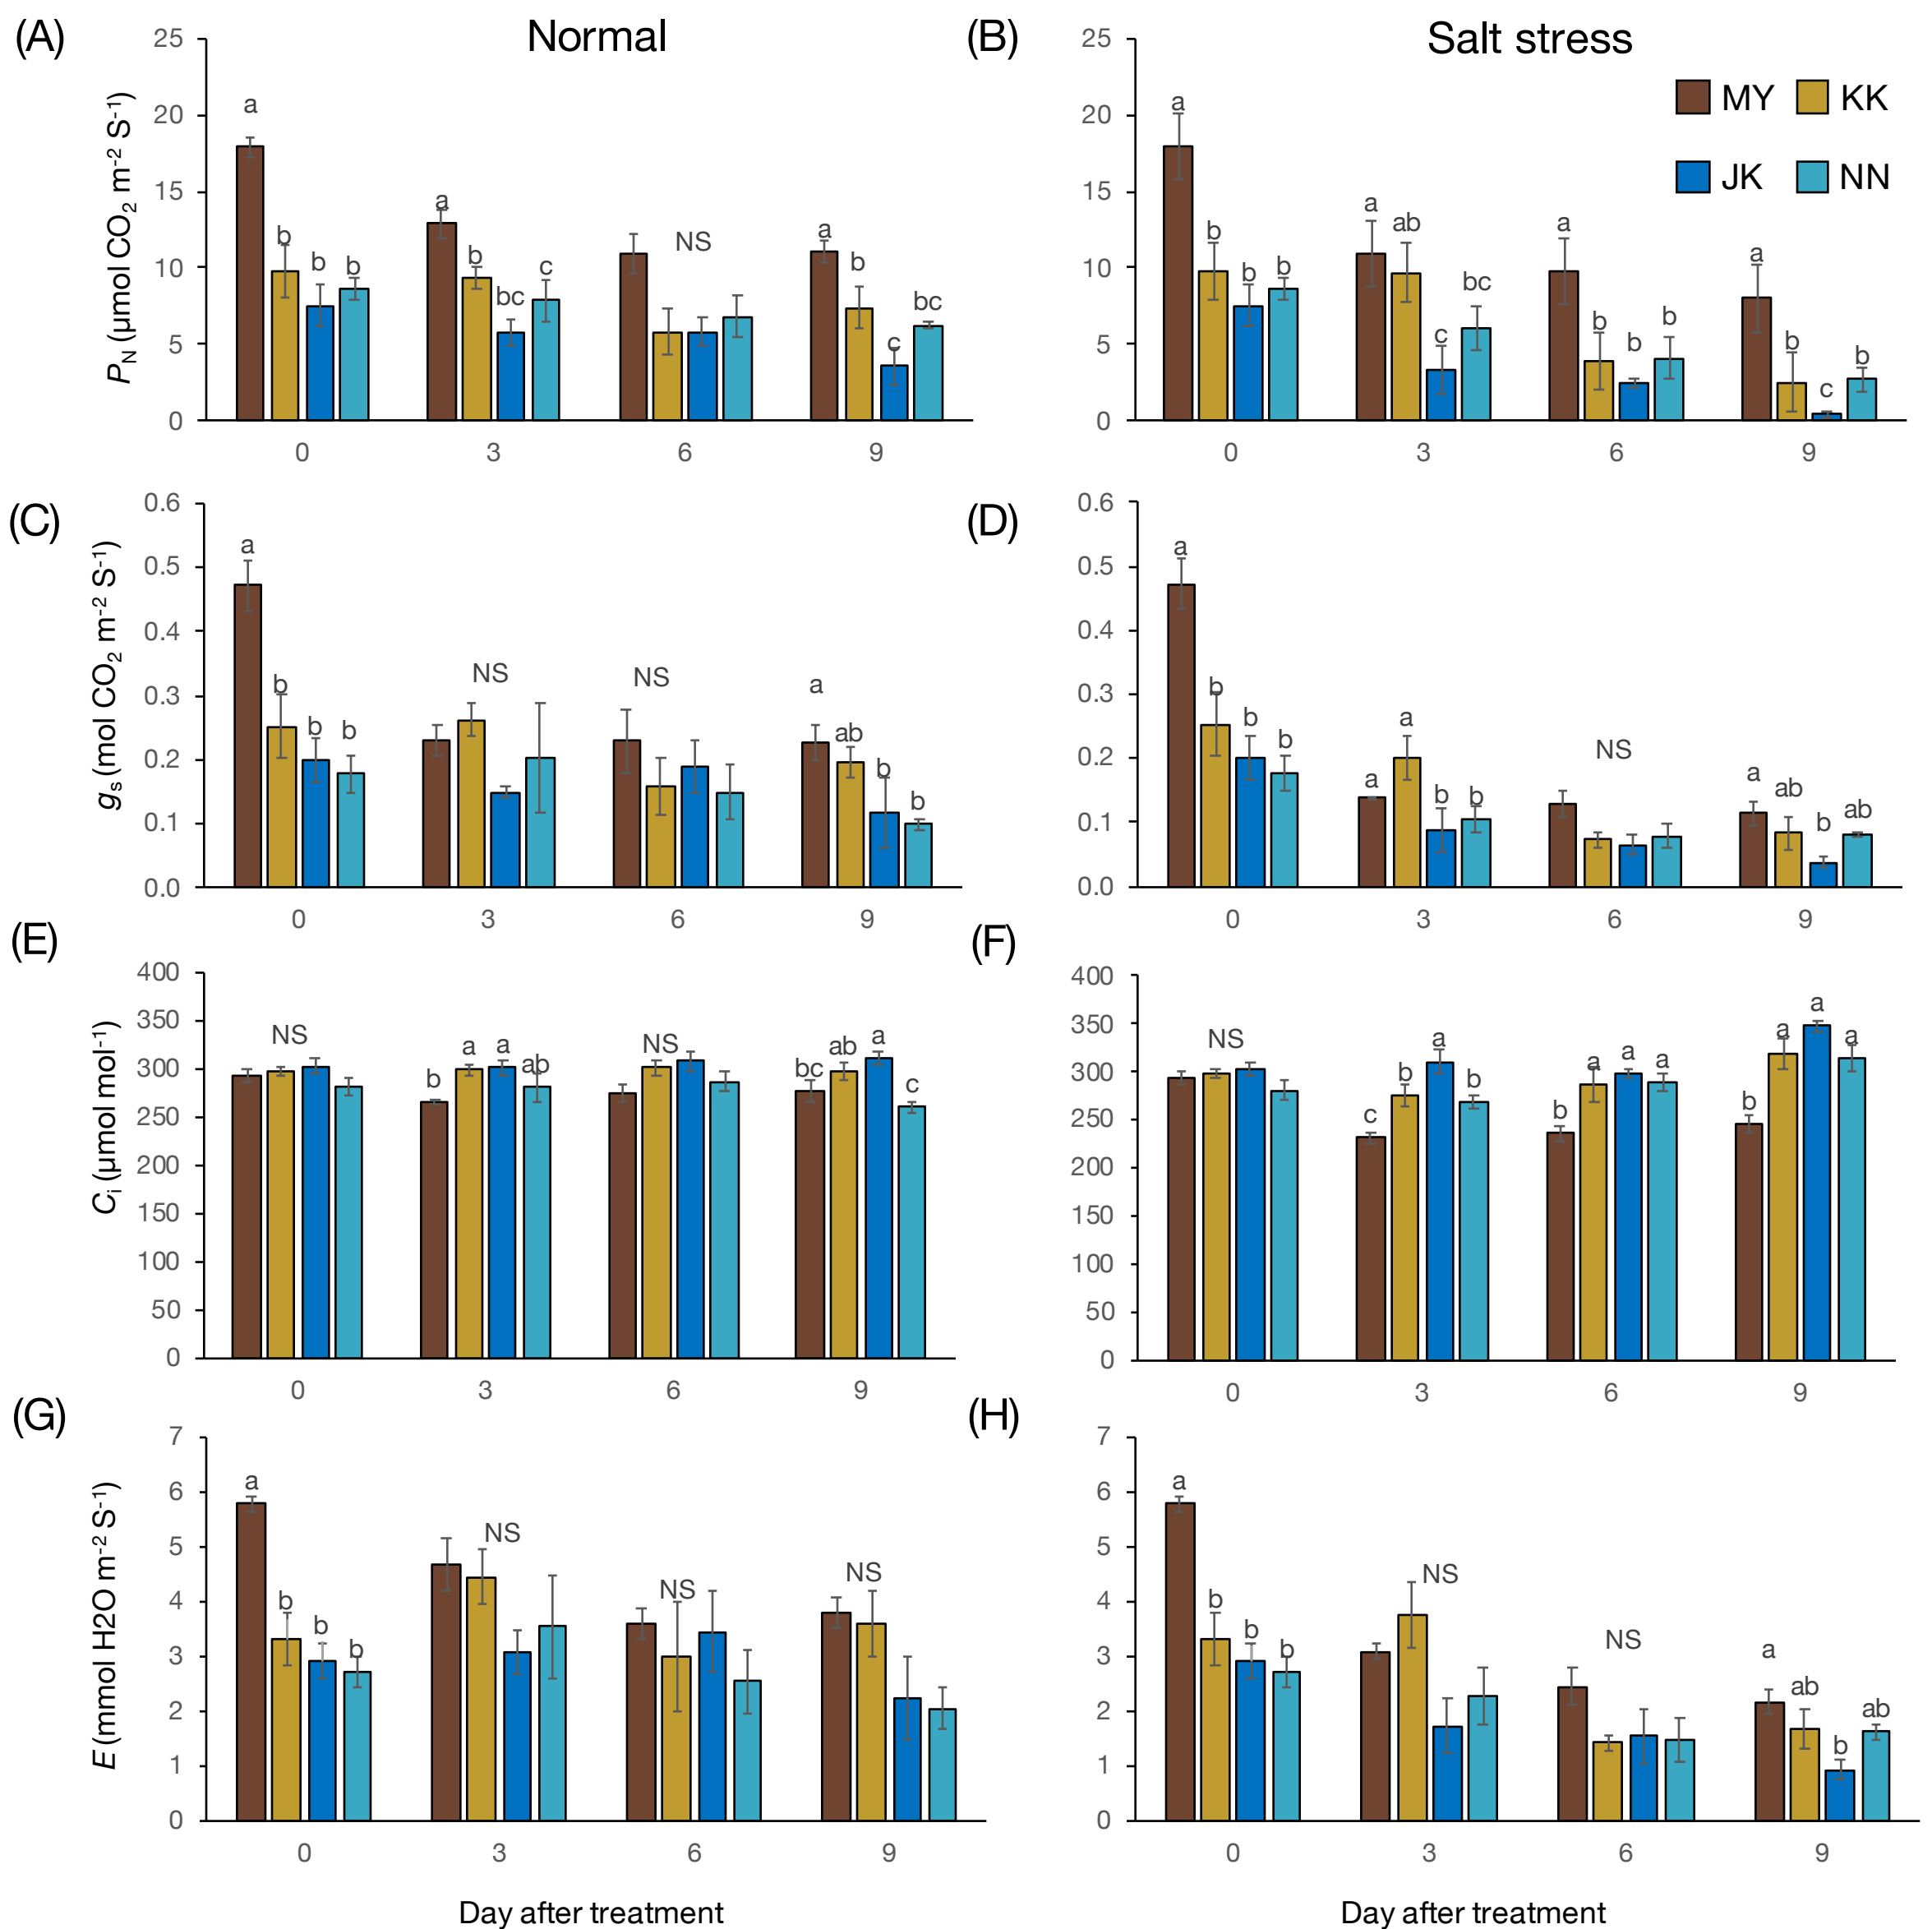

**Fig. S4** Photosynthetic parameters under normal (A, C, E, G) and salt stress (B, D, F, H) conditions of each rice variety at the flowering stage: net photosynthesis rate,  $P_N$  (A, B); stomatal conductance,  $g_s$  (C, D); intercellular  $\text{CO}_2$  concentration,  $C_i$  (E, F); and transpiration rate,  $E$  (G, H). Bar represents the standard error of four replicates. ANOVA was performed, followed by mean comparison with DMRT. Different letters above the bars show a statistically significant difference in means at  $p < 0.05$ . MY: Ma Yom, KK: Khitom Khao, JK: Jao Khao, NN: Nahng Nuan.
