# Supplementary material for: Comparative Genomic Analysis of Rice with Contrasting Photosynthesis and Grain Production under Salt Stress
Source: MDPI journal article supplement (doi:10.3390/genes10080562), 2019-07-25
Supplement: s1 [file s1]

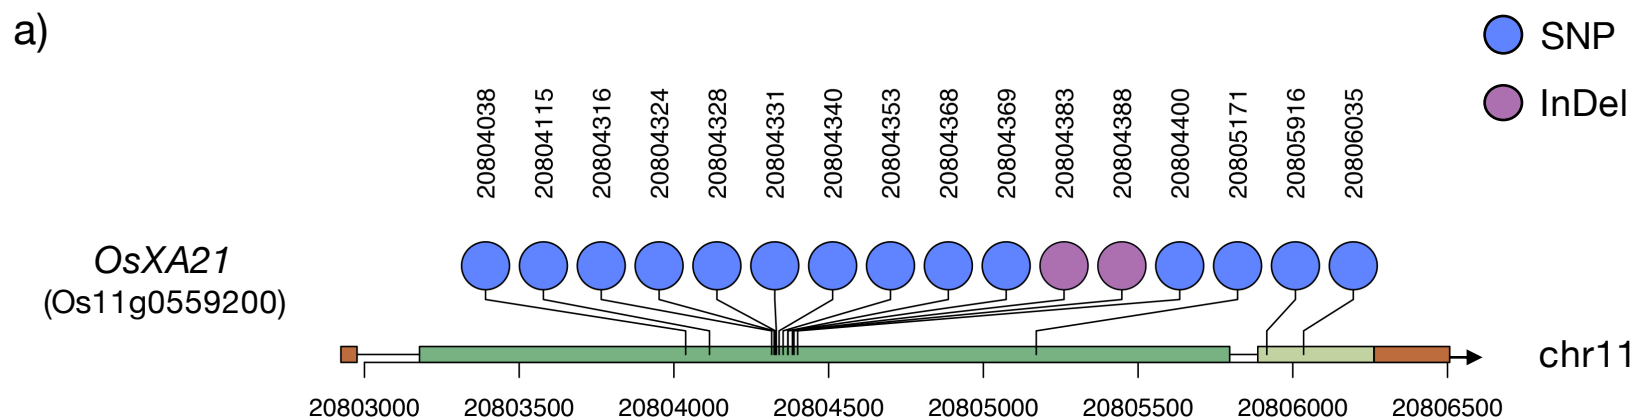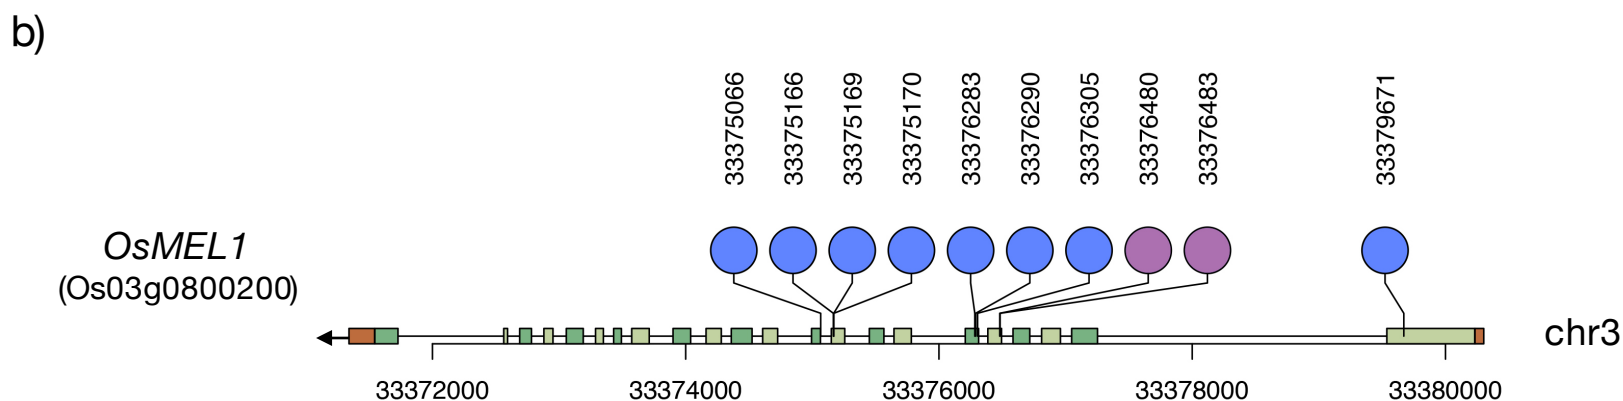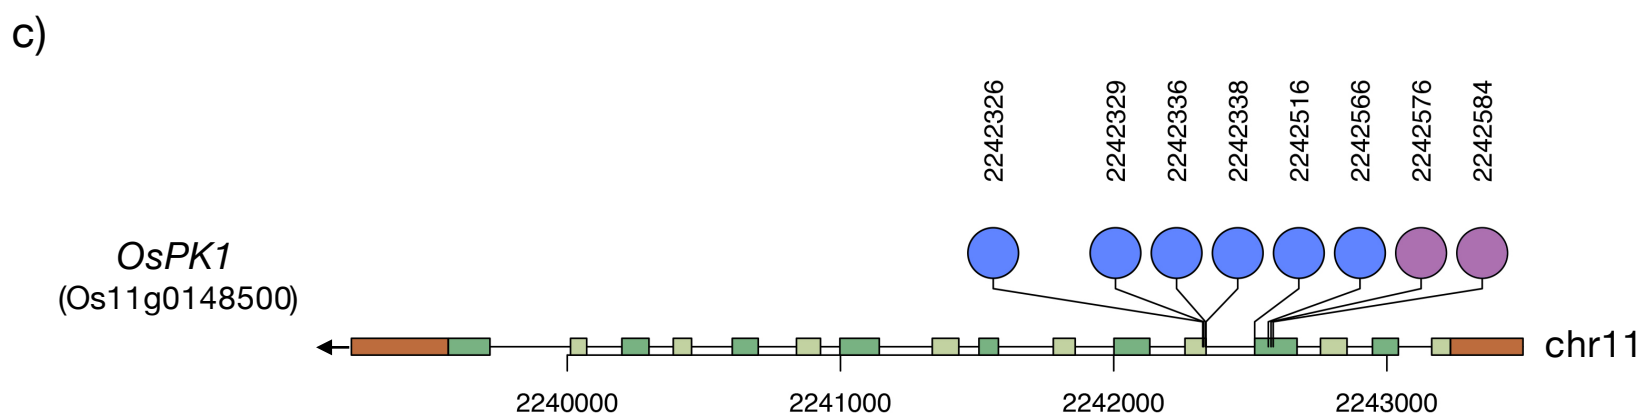

**Fig. S3** Gene structures and locations of high- and moderate-impact SNPs/InDels identified in MY/KK-JK/NN of A) *OsXA21* B) *OsMEL1* and C) *OsPK1*. Brown and green boxes indicate 3'- or 5'-UTRs and CDSs, respectively.
