# Supplementary material for: Comparative Genomic Analysis of Rice with Contrasting Photosynthesis and Grain Production under Salt Stress
Source: Genes (Basel). 2019 Jul 25;10(8):562. doi: 10.3390/genes10080562 (PMC6722916; doi:10.3390/genes10080562)
Supplement: Supplementary file 1 [file genes-10-00562-s001.zip]

Archive with 13 entries (13 files):
- All Supplementary Files/Fig.S1.pdf
- All Supplementary Files/Fig.S2.jpg
- All Supplementary Files/Fig.S3.pdf
- All Supplementary Files/Fig.S4.pdf
- All Supplementary Files/Fig.S5.pdf
- All Supplementary Files/Table_S2.xlsx
- All Supplementary Files/Table_S3.xlsx
- All Supplementary Files/Table_S4.xlsx
- All Supplementary Files/Table_S5.xlsx
- All Supplementary Files/Table_S6.xlsx
- All Supplementary Files/Table_S7.xlsx
- All Supplementary Files/TableS1.xlsx
- All Supplementary Files/TableS8.xlsx
