# Supplementary material for: Comparative Genomic Analysis of Rice with Contrasting Photosynthesis and Grain Production under Salt Stress
Source: Genes (Basel). 2019 Jul 25;10(8):562. doi: 10.3390/genes10080562 (PMC6722916; doi:10.3390/genes10080562)
Supplement: Supplementary file 1 [file genes-10-00562-s001.zip › All Supplementary Files/Table_S2.xlsx]

## Sheet: Table S1
Table S2 List of rice varieties and phenotypic data under normal and salt stress conditions of each rice variety at the flowering stage.
No.	Variety	Day3_PN (µmol CO2 m-2 s-1)								Day3_gs (mmol m-2 s-1)						Day3_Ci (µmol CO2 mol-1)								Day3_E (mmol H2O m-2 s-1)						Day6_PN (µmol CO2 m-2 s-1)								Day6_gs (mmol m-2 s-1)								Day6_Ci (µmol CO2 mol-1)
		Normal				Salt				Normal NS			Salt NS			Normal				Salt				Normal NS			Salt NS			Control				Salt				Normal				Salt				Normal
1	Pokkali	7.7925	±	1.25202	efg	5.415	±	0.63038	ghi	0.1875	±	0.0409013	0.095	±	0.005	287.433	±	8.26074	abcdef	270.62	±	12.2826	cdefg	3.8825	±	0.695921	2.3475	±	0.188519	9.255	±	0.67679	defgh	7.242	±	0.82975	bcdefghij	0.2275	±	0.00860717	cdefgh	0.1155	±	0.00583809	cdefgh	290.76	±	7.25871	abcd
2	Hahng Nahk	13.9925	±	1.33979	ab	6.4325	±	0.71565	defghi	0.2875	±	0.0471478	0.09	±	0.00707107	272.35	±	10.9809	bcdef	251.315	±	7.00029	defghi	5.67	±	0.884487	2.19	±	0.18143	12.6475	±	1.18499	abcd	8.6018	±	2.11541	abcdefg	0.277	±	0.059345	bcdefg	0.13025	±	0.0235527	bcdefgh	275.258	±	12.5597	cde
3	Daw Khao	12.3675	±	0.23932	abcd	9.5775	±	2.64603	bcdefg	0.2125	±	0.0160078	0.14	±	0.0535413	262.243	±	6.91223	ef	240.683	±	7.2703	efghi	4.3	±	0.326726	2.96	±	0.885259	10.9175	±	1.13351	bcdefg	8.2025	±	1.22337	abcdefgh	0.21875	±	0.0439211	defgh	0.13525	±	0.0377787	bcdefgh	269.41	±	13.3771	de
4	Man Wua	12.8875	±	1.48409	abc	10.0775	±	0.92008	bcdef	0.26	±	0.0460072	0.13	±	0.0158114	273.605	±	8.16996	abcdef	232.285	±	6.60742	hi	4.875	±	0.702905	2.7975	±	0.258759	12.205	±	0.78527	abcd	7.8955	±	1.49081	bcdefghi	0.293	±	0.0430252	bcdefg	0.13425	±	0.0192846	bcdefgh	286.73	±	15.2502	abcde
5	Plah Sew Dum	11.3275	±	2.07578	abcdef	6.9725	±	1.44311	cdefghi	0.2025	±	0.0466146	0.1075	±	0.0175	266.01	±	5.09502	def	260.232	±	10.0576	cdefgh	4.09	±	0.713174	2.6375	±	0.579761	11.9375	±	0.731	abcd	7.9888	±	1.19987	bcdefghi	0.31825	±	0.026145	abcdef	0.1735	±	0.0378032	abcd	297.87	±	5.44581	abcd
6	E-mum	13.71	±	1.51412	abc	14.42	±	1.03466	a	0.285	±	0.0603462	0.19	±	0.0318852	272.502	±	8.21455	abcdef	228.505	±	10.3936	hi	4.8975	±	0.657703	3.7725	±	0.447835	13.29	±	1.98372	abcd	12.2233	±	0.78153	a	0.263	±	0.0416913	bcdefg	0.16575	±	0.0143781	abcde	275.613	±	3.17048	cde
7	Rahk Haeng	12.68	±	1.73975	abc	10.23	±	0.64224	bcde	0.2525	±	0.0417083	0.1425	±	0.0197379	270.757	±	5.66121	bcdef	238.523	±	11.9695	ghi	4.6525	±	0.423052	3.11	±	0.247891	12.0025	±	0.79913	abcd	10.8823	±	0.86783	abcd	0.35425	±	0.0442952	abcd	0.2135	±	0.0185944	a	302.995	±	2.76792	abc
8	Inpaeng	8.2075	±	0.44895	defg	9.065	±	0.85847	bcdefgh	0.1725	±	0.0165202	0.14	±	0.0248328	279.697	±	7.44652	abcdef	247.235	±	15.1906	defghi	3.74	±	0.501115	3.0125	±	0.429464	13.4175	±	1.20283	abc	10.9993	±	0.81511	abc	0.3895	±	0.0439934	ab	0.19675	±	0.0179832	ab	301.18	±	4.70848	abc
9	Sam Aahng	10.315	±	0.84556	bcdef	6.67	±	1.05796	cdefghi	0.2075	±	0.0131498	0.115	±	0.0239792	276.94	±	2.13323	abcdef	266.33	±	4.80183	cdefg	4.2675	±	0.340988	2.62	±	0.508199	9.635	±	1.9296	cdefgh	8.2633	±	1.49751	abcdefgh	0.23775	±	0.0359476	cdefgh	0.1085	±	0.022198	cdefgh	293.038	±	1.96922	abcd
10	Ma Yom	12.87	±	0.99441	abc	10.8925	±	0.33671	abc	0.23	±	0.0248328	0.1375	±	0.0025	265.577	±	2.89117	def	231.752	±	5.92422	hi	4.675	±	0.468499	3.1	±	0.15072	10.9075	±	1.26591	bcdefg	9.7518	±	1.14205	abcde	0.22875	±	0.0487568	cdefgh	0.129	±	0.0198997	bcdefgh	275.463	±	9.77256	cde
11	Taban	9.4075	±	0.73268	cdefd	5.4475	±	1.732	ghi	0.2275	±	0.0478496	0.1525	±	0.0526585	283.375	±	15.9218	abcdef	303.762	±	9.37303	ab	3.835	±	0.243396	2.745	±	0.713355	7.56	±	1.33743	fghi	4.284	±	0.9148	hijkl	0.16325	±	0.0301119	gh	0.07975	±	0.00834041	gh	288.343	±	4.73914	abcd
12	Mahk Yom	11.3575	±	1.60453	abcdef	5.735	±	1.24112	fghi	0.285	±	0.05058	0.0975	±	0.0125	292.257	±	6.83693	abcde	271.625	±	13.2655	cdef	5.04	±	0.173542	2.2675	±	0.296827	12.1175	±	1.08944	abcd	7.592	±	1.08151	bcdefghij	0.34725	±	0.0276537	abcde	0.1235	±	0.01594	bcdefgh	300.21	±	10.7099	abcd
13	Hahng Mah Nai	9.2325	±	1.49618	cdefg	7.9525	±	1.00743	bcdefgh	0.2475	±	0.0265754	0.15	±	0.0195789	298.295	±	9.99784	abc	272.137	±	13.508	bcdef	4.825	±	0.586423	3.305	±	0.473665	11.09	±	0.83868	bcdefg	6.2353	±	1.71199	efghijkl	0.457	±	0.108918	a	0.14075	±	0.0342549	abcdefg	316.23	±	9.46286	a
14	Khitom Khao	9.3625	±	0.73891	cdefg	9.7125	±	0.95854	bcdefg	0.2625	±	0.0265754	0.2	±	0.0334166	299.935	±	5.61296	abc	274.98	±	11.1751	bcd	4.4525	±	0.499005	3.755	±	0.598366	5.8375	±	1.5484	hi	3.8915	±	1.24531	ijkl	0.15875	±	0.0458555	gh	0.0735	±	0.0117792	gh	301.657	±	8.71994	abc
15	Mahk Bid	11.095	±	1.38913	bcdef	6.1375	±	0.93809	efghi	0.25	±	0.0391578	0.115	±	0.0104083	281.19	±	4.35783	abcdef	273.143	±	8.40223	bcde	4.5625	±	0.313777	2.7475	±	0.375552	12.6725	±	0.48808	abcd	6.7133	±	0.83729	cdefghijk	0.361	±	0.0286967	abcd	0.1035	±	0.0191333	defgh	297.888	±	5.96586	abcd
16	Leuang Dong	14.045	±	1.43078	ab	8.92	±	1.55747	bcdefgh	0.2775	±	0.0425	0.1425	±	0.0283945	269.72	±	5.85208	cdef	252.27	±	9.92463	defghi	4.8975	±	0.915536	2.95	±	0.707354	10.9575	±	0.85683	bcdefg	6.6128	±	1.60923	defghijk	0.202	±	0.0176399	efgh	0.0925	±	0.0200104	efgh	272.765	±	4.73229	cde
17	Ruang Diaw	11.1625	±	1.45594	bcdef	8.3975	±	0.95243	bcdefgh	0.2475	±	0.0495606	0.1325	±	0.0271953	279.392	±	6.97437	abcdef	250.678	±	14.515	defghi	4.645	±	0.467003	3.0075	±	0.453401	11.66	±	2.20376	abcde	10.1293	±	0.61859	abcde	0.35575	±	0.0639966	abcd	0.166	±	0.0157692	abcde	301.23	±	3.36719	abc
18	Mae Mahy	10.31	±	0.64693	bcdef	9.3975	±	0.86762	bcdefgh	0.2775	±	0.0423035	0.175	±	0.0165831	291.062	±	14.2408	abcdef	274.08	±	7.88683	bcd	4.66	±	0.243447	3.5575	±	0.478563	7.94	±	1.65067	efghi	3.406	±	1.28632	jkl	0.19475	±	0.0677242	fgh	0.09025	±	0.0222762	fgh	284.56	±	13.2376	bcde
19	Plah Kaeng	12.2225	±	1.58919	abcde	10.1075	±	0.82274	bcdef	0.2175	±	0.0490535	0.13	±	0.0135401	260.795	±	9.13858	f	232.705	±	2.90005	hi	4.135	±	0.440407	3.045	±	0.500891	11.475	±	0.69239	bcdef	7.6473	±	1.57143	bcdefghi	0.31775	±	0.036181	abcdef	0.13825	±	0.0329403	bcdefgh	296.778	±	4.8693	abcd
20	Jao Khao	5.78	±	0.85548	g	3.2775	±	1.58071	i	0.15	±	0.00912871	0.0875	±	0.0344903	301.39	±	7.17059	ab	310.67	±	12.4596	a	3.0675	±	0.404235	1.74	±	0.488859	5.8375	±	0.9342	hi	2.531	±	0.29397	kl	0.18825	±	0.0410028	fgh	0.064	±	0.0152261	h	308.63	±	9.91388	ab
21	Muay Hin	13.5025	±	2.0315	abc	10.35	±	0.24283	bcde	0.2725	±	0.0798305	0.13	±	0.00707107	271.072	±	10.639	bcdef	231.442	±	7.42	hi	4.9675	±	0.849631	3.0675	±	0.240117	14.5625	±	0.93697	ab	9.8898	±	0.5654	abcde	0.3715	±	0.0240295	abc	0.1825	±	0.0166758	abc	295.012	±	4.70882	abcd
22	Dawk Mai	11.6825	±	1.06657	abcdef	8.2925	±	1.92243	bcdefgh	0.1975	±	0.0154785	0.1175	±	0.0170171	263.295	±	5.5941	def	247.143	±	9.87563	defghi	4.0925	±	0.169331	2.6825	±	0.27762	11.66	±	1.40504	abcde	9.9203	±	1.33595	abcde	0.263	±	0.036799	bcdefg	0.164	±	0.0266114	abcdef	285.155	±	2.07736	bcde
23	Ta-pow Lom	10.595	±	1.18582	bcdef	7.2675	±	1.29443	bcdefghi	0.23	±	0.0552268	0.1425	±	0.0413068	276.903	±	10.7315	abcdef	274.21	±	8.17035	bcd	4.54	±	0.997296	2.84	±	0.684154	5.2025	±	0.36461	i	2.2733	±	0.77066	l	0.10275	±	0.0219976	h	0.06275	±	0.00576447	h	274.125	±	11.2856	cde
24	De Si	7.7375	±	0.97251	fg	5.005	±	1.42898	hi	0.23	±	0.0402078	0.105	±	0.0275379	303.035	±	8.55933	a	286.255	±	12.3193	abc	4.02	±	0.334116	2.02	±	0.41136	5.79	±	0.84499	hi	4.126	±	1.08033	hijkl	0.17325	±	0.029806	fgh	0.08425	±	0.0134559	gh	300.402	±	21.5794	abc
25	Med Ma-muang	9.8125	±	0.67065	cdefg	6.29	±	1.94752	defghi	0.2475	±	0.0239357	0.11	±	0.0310913	294.17	±	5.2712	abcd	274.222	±	9.44822	bcd	4.2825	±	0.359012	2.2025	±	0.405388	7.52	±	0.33003	ghi	5.2983	±	1.79503	fghijkl	0.183	±	0.0161452	fgh	0.09075	±	0.0220959	fgh	294.498	±	2.88951	abcd
26	Niaw Mali	15.59	±	1.60869	a	11.5825	±	0.72998	ab	0.275	±	0.0396863	0.1475	±	0.0188746	262.37	±	3.58349	ef	229.022	±	9.81954	hi	5.2075	±	0.451837	3.2225	±	0.215073	15.565	±	1.19886	a	9.2325	±	1.83942	abcdef	0.3715	±	0.043674	abc	0.16325	±	0.0295589	abcdef	288.22	±	2.02721	abcd
27	Daw Dawk Mai	13.6575	±	1.62631	abc	10.7125	±	2.4309	abcd	0.2875	±	0.0295452	0.1625	±	0.0340037	277.68	±	7.96805	abcdef	254.71	±	6.77917	cdefghi	5.115	±	0.287793	3.23	±	0.518347	11.305	±	1.49915	bcdefg	9.9353	±	1.43633	abcde	0.2945	±	0.0466699	bcdefg	0.16775	±	0.0304669	abcd	293.712	±	4.5971	abcd
28	Nahng Nuan	7.8675	±	1.32907	efg	6.0425	±	1.47879	efghi	0.2025	±	0.0845946	0.105	±	0.0206155	281.493	±	14.5249	abcdef	268.647	±	7.30516	cdefg	3.5575	±	0.938681	2.28	±	0.537169	6.845	±	1.3755	hi	4.089	±	1.32937	hijkl	0.15	±	0.0419027	gh	0.0785	±	0.0197927	gh	287.397	±	9.71981	abcd
29	Sew Mae Jan	13.215	±	1.02136	abc	8.9775	±	0.79569	bcdefgh	0.265	±	0.0507445	0.1225	±	0.0165202	267.18	±	16.3877	def	239.49	±	6.14124	fghi	4.92	±	0.566495	2.6675	±	0.0840015	12.4175	±	0.49785	abcd	11.2995	±	0.78257	ab	0.35325	±	0.0557649	abcd	0.21225	±	0.0141679	a	298.05	±	9.82639	abcd
30	Leuang Pratew 123	10.2125	±	1.02077	bcdef	7.4375	±	0.4506	bcdefghi	0.1225	±	0.0154785	0.09	±	0.00816497	220.51	±	8.53262	g	224.062	±	4.21499	i	3.7	±	0.462006	2.7975	±	0.191328	9.53	±	0.3654	cdefgh	4.5463	±	1.37522	ghijkl	0.1505	±	0.0123861	gh	0.068	±	0.0138263	gh	257.63	±	6.52802	e
[truncated: 52 more columns]
