# Supplementary material for: Comparative Genomic Analysis of Rice with Contrasting Photosynthesis and Grain Production under Salt Stress
Source: Genes (Basel). 2019 Jul 25;10(8):562. doi: 10.3390/genes10080562 (PMC6722916; doi:10.3390/genes10080562)
Supplement: Supplementary file 1 [file genes-10-00562-s001.zip › All Supplementary Files/Table_S3.xlsx]

## Sheet: Sheet1
Table S3 Number of SNPs and InDels identified in HYR and LYR varieties. SNPs and InDels were annotated based on their location.
Region	SNPs				InDels
	MY	KK	JK	NN	MY	KK	JK	NN
3'-UTR	23378	23024	16722	20326	3746	3736	2633	3316
5'-UTR	13876	13763	10322	12160	1843	1905	1389	1676
Downstream	843002	806988	575691	683423	120166	115212	80441	96877
Exonic	67914	64549	48481	56664	6408	6051	4562	5487
Genic	-	-	-	-	21	14	8	9
Intergenic	560799	537724	393972	461056	68428	65543	46913	55664
Intron	87337	83457	58865	70453	15046	14216	9877	12272
Splice site acceptor	94	92	81	92	39	42	29	38
Splice site donor	90	86	69	71	27	31	22	35
Splice site region	2687	2553	1838	2162	464	496	330	428
Transcript	1	-	-	-	38	36	20	33
Upstream	855429	818329	582053	695813	120338	115123	80701	98337
