# Supplementary material for: Comparative Genomic Analysis of Rice with Contrasting Photosynthesis and Grain Production under Salt Stress
Source: Genes (Basel). 2019 Jul 25;10(8):562. doi: 10.3390/genes10080562 (PMC6722916; doi:10.3390/genes10080562)
Supplement: Supplementary file 1 [file genes-10-00562-s001.zip › All Supplementary Files/Table_S4.xlsx]

## Sheet: Sheet1
Table S4 Annotation of SNPs and InDels defined in specific, shared and common variants
Effect	Sequence Ontology	MY- KK/JK/NN	KK- MY/JK/NN	JK- MY/KK/NN	NN -MY/KK/JK	MY/KK-JK/NN	MY/JK-KK/NN	MY/NN-KK/JK
High	bidirectional gene fusion	10	7	2	2	0	5	1
	exon loss variant	1	0	3	1	0	1	0
	Frameshift variant	1278	1112	959	1076	528	375	298
	gene fusion	5	4	2	2	0	2	1
	splice acceptor variant	68	64	53	54	22	24	13
	splice donor variant	70	61	43	56	24	19	12
	start lost	30	29	19	27	8	7	12
	stop gained	256	244	198	263	109	65	47
	stop lost	84	75	56	61	31	17	20
	non-canonical start codon	0	0	0	0	0	0	0
Moderate	5' UTR premature truncation	526	6318	3	1	0	1	0
	disruptive inframe deletion	273	234	139	213	76	43	54
	disruptive inframe insertion	232	180	145	179	52	33	39
	missense variant	13191	11708	8795	10106	4992	3541	3344
Low	5' UTR start codon gain	973	953	668	842	337	285	239
	initiator codon variant	1	4	1	0	0	1	0
	splice region variant	1810	1585	1103	1349	713	507	384
	stop retained variant	15	18	9	13	12	3	3
Modifier	synonymous variant	10779	9914	7051	8067	4072	2867	2717
	3'-UTR variant	13383	12316	9273	10778	5070	3952	3742
	5'-UTR variant	6452	704	4875	5840	2325	1912	1710
	conservative inframe deletion	156	154	85	86	43	32	27
	conservative inframe insertion	247	193	106	184	46	36	38
	downstream gene variant	553068	498619	343272	419089	174575	131362	127709
	intergenic region	354359	316570	228334	270372	115059	85951	83589
	intragenic	3501	2	0	3	1	0	6143
	intron variant	53338	51441	34515	42860	19185	14777	7921
	non-coding transcript exon variant	12981	10682	7160	8959	3408	2780	2947
	non-coding transcript variant	15	17	16	15	4	6	4
	upstream gene variant	563523	508449	350196	428963	176968	134560	127765
