# Supplementary material for: Comparative Genomic Analysis of Rice with Contrasting Photosynthesis and Grain Production under Salt Stress
Source: Genes (Basel). 2019 Jul 25;10(8):562. doi: 10.3390/genes10080562 (PMC6722916; doi:10.3390/genes10080562)
Supplement: Supplementary file 1 [file genes-10-00562-s001.zip › All Supplementary Files/Table_S5.xlsx]

## Sheet: Sheet1
Table S5 Frequency of SNPs and InDels identified in LYR and HYR that were detected on individual rice chromosomes
Chromosome	Length (bp)	No. of SNPs	SNPs/100kb	No. of InDels	InDels/100Kb
Chr1	43270923	12882	29.5635	1633	3.71727
Chr2	35937250	12149	33.6625	1384	3.78552
Chr3	36413819	11175	30.4977	1291	3.47172
Chr4	35502694	11603	32.374	1322	3.6582
Chr5	29958434	9517	31.5467	1105	3.61745
Chr6	31248787	11523	36.5751	1210	3.80944
Chr7	29697621	10941	36.6061	1308	4.30437
Chr8	28443022	10076	35.0596	1189	4.0989
Chr9	23012720	9918	42.8174	1242	5.33652
Chr10	23207287	9184	39.3319	1119	4.74941
Chr11	29021106	11995	40.8179	1469	4.93029
Chr12	27531856	9354	33.71	1124	3.98335
	373,245,519	130317	35.2135	15396	4.12187
