# Supplementary material for: Comparative Genomic Analysis of Rice with Contrasting Photosynthesis and Grain Production under Salt Stress
Source: Genes (Basel). 2019 Jul 25;10(8):562. doi: 10.3390/genes10080562 (PMC6722916; doi:10.3390/genes10080562)
Supplement: Supplementary file 1 [file genes-10-00562-s001.zip › All Supplementary Files/Table_S6.xlsx]

## Sheet: Sheet1
Table S6 List of 2,089 genes identified in MY-KK/JK-NN containing high- and moderate-impact variants
Query	RAPdb.id	MSU.id	MSU.description
OS01G0105800	Os01g0105800	LOC_Os01g01610	IscA-like iron-sulfur assembly protein, mitochondrial precursor, putative, expressed
OS01G0106600	Os01g0106600	LOC_Os01g01680	expressed protein
OS01G0108400	Os01g0108400,Os01g0108500	LOC_Os01g01840	helix-loop-helix DNA-binding domain containing protein, expressed
OS01G0109300	Os01g0109300	LOC_Os01g01920	HD domain containing protein 2, putative, expressed
OS01G0110100	Os01g0110100	LOC_Os01g02000	phosphate transporter 1, putative, expressed
OS01G0110500	Os01g0110500	LOC_Os01g02040	retrotransposon protein, putative, unclassified, expressed
OS01G0110600	OS01G0110600	NULL	NULL
OS01G0110800	Os01g0110800	LOC_Os01g02060	TOO MANY MOUTHS precursor, putative, expressed
OS01G0112100	Os01g0112100,Os01g0112050	LOC_Os01g02170	expressed protein
OS01G0112800	Os01g0112800	LOC_Os01g02250	RGA-1, putative, expressed
OS01G0113600	Os01g0113600	LOC_Os01g02334	expressed protein
OS01G0113700	Os01g0113700	LOC_Os01g02350	receptor-like kinase ARK1AS, putative, expressed
OS01G0113800	Os01g0113800	LOC_Os01g02360	resistance-related receptor-like kinase, putative, expressed
OS01G0114100	Os01g0114100	LOC_Os01g02390	protein kinase domain containing protein, expressed
OS01G0114700	Os01g0114700	LOC_Os01g02440	Ser/Thr receptor-like kinase, putative, expressed
OS01G0115600	Os01g0115600	LOC_Os01g02560	Ser/Thr receptor-like kinase, putative, expressed
OS01G0116300	Os01g0116300	LOC_Os01g02690	resistance-related receptor-like kinase, putative, expressed
OS01G0116900	Os01g0116900	LOC_Os01g02710	LRk-type protein, putative, expressed
OS01G0117000	Os01g0117000	LOC_Os01g02760	receptor-like kinase, putative, expressed
OS01G0117500	Os01g0117500	LOC_Os01g02810	resistance-related receptor-like kinase, putative, expressed
OS01G0124200	Os01g0124200	LOC_Os01g03340	BBTI4 - Bowman-Birk type bran trypsin inhibitor precursor, expressed
OS01G0124900	Os01g0124900	LOC_Os01g03400	E3 ubiquitin-protein ligase SINA-like 2, putative
OS01G0126900	Os01g0126900	LOC_Os01g03620	multicopper oxidase domain containing protein, expressed
OS01G0131250	Os01g0131250	LOC_Os01g04005	expressed protein
OS01G0133400	Os01g0133400	LOC_Os01g04190	transporter family protein, putative, expressed
OS01G0136800	Os01g0136800	LOC_Os01g04450	OsWAK2 - OsWAK receptor-like cytoplasmic kinase OsWAK-RLCK, expressed
OS01G0136900	Os01g0136900	LOC_Os01g04460	Ser/Thr protein kinase, putative, expressed
OS01G0137250	Os01g0137200,Os01g0137250	LOC_Os01g04480	expressed protein
OS01G0137282	Os01g0137282	LOC_Os01g04490	Ser/Thr protein kinase, putative, expressed
OS01G0137300	Os01g0137300	LOC_Os01g04500	expressed protein
OS01G0137400	Os01g0137400	LOC_Os01g04470	expressed protein
OS01G0137500	Os01g0137500	LOC_Os01g04520	Ser/Thr protein kinase, putative, expressed
OS01G0142200	Os01g0142200	LOC_Os01g04910	TP53RK-binding protein, putative, expressed
OS01G0143800	Os01g0143800	LOC_Os01g05060	mitochondrial glycoprotein, putative, expressed
OS01G0147400	Os01g0147400	LOC_Os01g05440	XH domain containing protein, expressed
OS01G0147800	Os01g0147800	LOC_Os01g05480	expressed protein
OS01G0149350	Os01g0149350	LOC_Os01g05600	NBS-LRR disease resistance protein, putative, expressed
OS01G0150400	Os01g0150400	LOC_Os01g05710	expressed protein
OS01G0150950	Os01g0150950	LOC_Os01g05770	expressed protein
OS01G0152500	OS01G0152500	NULL	NULL
OS01G0152600	Os01g0152600,Os01g0152687	LOC_Os01g05940	receptor kinase, putative, expressed
OS01G0153275	OS01G0153275	NULL	NULL
OS01G0153900	Os01g0153900	LOC_Os01g06070	expressed protein
OS01G0153950	Os01g0153950,Os01g0154000	LOC_Os01g06080	expressed protein
OS01G0154100	Os01g0154100	LOC_Os01g06090	expressed protein
OS01G0154500	Os01g0154500	LOC_Os01g06140	expressed protein
OS01G0158100	OS01G0158100	NULL	NULL
OS01G0158900	Os01g0158900	LOC_Os01g06550	NF-X1-type zinc finger protein, putative, expressed
OS01G0160700	Os01g0160700	LOC_Os01g06730	verticillium wilt disease resistance protein, putative, expressed
OS01G0161300	Os01g0161300	LOC_Os01g06790	disease resistance protein, putative, expressed
OS01G0162200	Os01g0162200	LOC_Os01g06870	resistance protein SlVe1 precursor, putative, expressed
OS01G0163450	OS01G0163450	NULL	NULL
OS01G0169500	Os01g0169500	LOC_Os01g07490	RST1, putative, expressed
OS01G0173900	Os01g0173900	LOC_Os01g07870	ABC transporter family protein, putative, expressed
OS01G0174500	Os01g0174500	LOC_Os01g07920	prolyl 4-hydroxylase, putative, expressed
OS01G0174900	Os01g0174900	LOC_Os01g07950	OsGrx_S15.2 - glutaredoxin subgroup II, expressed
OS01G0175600	Os01g0175600,Os01g0175700	LOC_Os01g08020	boron transporter protein, putative, expressed
OS01G0177200	Os01g0177200	LOC_Os01g08200	ubiquitin carboxyl-terminal hydrolase 14, putative, expressed
OS01G0178100	Os01g0178100	LOC_Os01g08280	expressed protein
OS01G0179500	Os01g0179500	LOC_Os01g08430	expressed protein
OS01G0182400	Os01g0182400	LOC_Os01g08680	myb/SANT domain protein, putative, expressed
OS01G0182500	Os01g0182500	LOC_Os01g08690	holocarboxylase synthetase, putative, expressed
OS01G0184700	Os01g0184700	LOC_Os01g08950	expressed protein
OS01G0187400	Os01g0187400	LOC_Os01g09246	glycine-rich protein, putative, expressed
OS01G0195000	Os01g0195066,Os01g0195000	LOC_Os01g09850	ZOS1-04 - C2H2 zinc finger protein, expressed
OS01G0197700	Os01g0197700	LOC_Os01g10110	cytokinin dehydrogenase precursor, putative, expressed
OS01G0199700	Os01g0199700	LOC_Os01g10260	expressed protein
OS01G0201850	OS01G0201850	NULL	NULL
OS01G0205100	Os01g0205100	LOC_Os01g10790	WD domain, G-beta repeat domain containing protein, expressed
OS01G0207700	Os01g0207700	LOC_Os01g10970	auxin-induced protein 5NG4, putative, expressed
OS01G0209150	OS01G0209150	NULL	NULL
OS01G0217100	Os01g0217100	LOC_Os01g11820	expressed protein
OS01G0218700	Os01g0218700	LOC_Os01g11946	ABC transporter, ATP-binding protein, putative, expressed
OS01G0218800	Os01g0218800	LOC_Os01g11952	histone-lysine N-methyltransferase ATX5, putative, expressed
OS01G0220801	OS01G0220801	NULL	NULL
OS01G0224400	Os01g0224400	LOC_Os01g12470	mitochondrial carrier protein, putative, expressed
OS01G0227200	Os01g0227200	LOC_Os01g12720	protein kinase domain containing protein, expressed
OS01G0227700	Os01g0227700	LOC_Os01g12760	cytochrome P450, putative, expressed
OS01G0229000	Os01g0229000	LOC_Os01g12860	MYB family transcription factor, putative, expressed
OS01G0229100	Os01g0229100	LOC_Os01g12870	eukaryotic translation initiation factor 3 subunit E-interacting protein, putative, expressed
OS01G0231800	Os01g0231800	LOC_Os01g13090	nucleic acid binding protein, putative, expressed
OS01G0234200	Os01g0234200	LOC_Os01g13310	DNA topoisomerase 2, putative, expressed
OS01G0237366	Os01g0237366	LOC_Os01g13600	nmrA-like family domain containing protein, expressed
OS01G0244000	Os01g0244000	LOC_Os01g14180	expressed protein
OS01G0278050	OS01G0278050	NULL	NULL
OS01G0286600	Os01g0286600	LOC_Os01g18320	protoporphyrinogen oxidase, chloroplast precursor, putative, expressed
OS01G0290000	Os01g0290000	LOC_Os01g18630	aspartic proteinase oryzasin-1 precursor, putative, expressed
OS01G0292700	Os01g0292700	LOC_Os01g18840	IF, putative, expressed
OS01G0293900	Os01g0293900	LOC_Os01g18930	peroxidase precursor, putative, expressed
OS01G0296166	OS01G0296166	NULL	NULL
OS01G0296200	Os01g0296200	LOC_Os01g19170	polygalacturonase, putative, expressed
OS01G0298301	OS01G0298301	NULL	NULL
OS01G0301500	Os01g0301500	LOC_Os01g19529	pentatricopeptide, putative, expressed
OS01G0306900	Os01g0306900	LOC_Os01g20120	expressed protein
OS01G0307624	Os01g0307624	LOC_Os01g20204	expressed protein
OS01G0311500	Os01g0311500	LOC_Os01g20940	PHS1, putative, expressed
OS01G0317800	Os01g0317800	LOC_Os01g21560	esterase/lipase/thioesterase family protein, putative, expressed
OS01G0318202	OS01G0318202	NULL	NULL
OS01G0321900	Os01g0321900	LOC_Os01g21880	expressed protein
OS01G0327600	Os01g0327600	LOC_Os01g22390	WD domain containing protein, putative, expressed
OS01G0332100	Os01g0332100	LOC_Os01g22900	neutral/alkaline invertase, putative, expressed
OS01G0337100	Os01g0337100	LOC_Os01g23530	terpene synthase, putative, expressed
OS01G0343100	Os01g0343100	LOC_Os01g24050	expressed protein
OS01G0343200	Os01g0343200	LOC_Os01g24060	importin subunit alpha, putative, expressed
OS01G0346250	Os01g0346250	LOC_Os01g24420	expressed protein
OS01G0355600	Os01g0355600	LOC_Os01g25330	SAC9, putative, expressed
OS01G0356800	Os01g0356800	LOC_Os01g25450	AIG1 family protein, expressed
OS01G0362533	OS01G0362533	NULL	NULL
OS01G0364400	Os01g0364400	LOC_Os01g26210	OsWAK6 - OsWAK receptor-like protein kinase, expressed
OS01G0368700	Os01g0368700	LOC_Os01g27120	expressed protein
OS01G0373400	Os01g0373400	LOC_Os01g27590	transposon protein, putative, Pong sub-class, expressed
OS01G0374600	Os01g0374600	LOC_Os01g27700	laccase precursor protein, putative, expressed
OS01G0375100	Os01g0375100	LOC_Os01g27740	dnaJ domain containing protein, expressed
OS01G0391100	OS01G0391100	NULL	NULL
OS01G0512200	Os01g0512200	LOC_Os01g32880	AP-3 complex subunit delta, putative, expressed
OS01G0520180	Os01g0520180	LOC_Os01g33615	expressed protein
OS01G0520600	Os01g0520600	LOC_Os01g33684	disease resistance RPP13-like protein 1, putative, expressed
OS01G0530341	OS01G0530341	NULL	NULL
OS01G0534800	Os01g0534800	LOC_Os01g35040	ZOS1-09 - C2H2 zinc finger protein, expressed
OS01G0536501	Os01g0536501	LOC_Os01g35254	transposon protein, putative, CACTA, En/Spm sub-class, expressed
OS01G0541900	Os01g0541900	LOC_Os01g36080	protein phosphatase 2C containing protein, expressed
OS01G0553600	Os01g0553600	LOC_Os01g37280	expressed protein
OS01G0562400	Os01g0562400	LOC_Os01g38180	peptidyl-prolyl isomerase, putative, expressed
OS01G0576100	Os01g0576100	LOC_Os01g39480	anthocyanin regulatory Lc protein, putative, expressed
OS01G0579900	Os01g0579900	LOC_Os01g39790	esterase/lipase/thioesterase, putative, expressed
OS01G0580000	Os01g0580000	LOC_Os01g39800	esterase, putative, expressed
OS01G0582600	Os01g0582600	LOC_Os01g40070	expressed protein
OS01G0587150	OS01G0587150	NULL	NULL
OS01G0587300	Os01g0587300	LOC_Os01g40480	anthranilate phosphoribosyltransferase, putative, expressed
OS01G0590200	Os01g0590200	LOC_Os01g40750	expressed protein
OS01G0599550	OS01G0599550	NULL	NULL
OS01G0600300	Os01g0600300	LOC_Os01g41640	expressed protein
OS01G0601000	Os01g0601000	LOC_Os01g41720	expressed protein
OS01G0601625	Os01g0601625	LOC_Os01g41750	expressed protein
OS01G0601675	Os01g0601675	LOC_Os01g41770	leucine rich repeat protein, putative, expressed
OS01G0601700	Os01g0601700	LOC_Os01g41780	expressed protein
OS01G0602400	Os01g0602400	LOC_Os01g41810	cytochrome P450 72A1, putative, expressed
OS01G0603800	Os01g0603800	LOC_Os01g41930	leucine rich repeat protein, putative, expressed
OS01G0604000	OS01G0604000	NULL	NULL
OS01G0604100	Os01g0604100	LOC_Os01g41950	expressed protein
OS01G0604150	Os01g0604150	LOC_Os01g41960	retrotransposon protein, putative, unclassified, expressed
OS01G0605400	Os01g0605400	LOC_Os01g42060	expressed protein
OS01G0607400	Os01g0607400	LOC_Os01g42260	transcriptional corepressor LEUNIG, putative, expressed
OS01G0616400	Os01g0616400	LOC_Os01g42970	zinc finger C-x8-C-x5-C-x3-H type family protein, expressed
OS01G0617650	Os01g0617600,Os01g0617650	LOC_Os01g43040	amino acid transporter, putative, expressed
OS01G0618300	Os01g0618300	LOC_Os01g43110	expressed protein
OS01G0618800	Os01g0618800	LOC_Os01g43150	OsFtsH9 FtsH protease, homologue of AtFtsH11, expressed
OS01G0640100	Os01g0640000,Os01g0640100	LOC_Os01g45290	retrotransposon protein, putative, unclassified, expressed
OS01G0653350	Os01g0653350	LOC_Os01g46450	expressed protein
OS01G0653800	Os01g0653800	LOC_Os01g46510	peptidase S8 and S53, subtilisin, kexin, sedolisin, putative, expressed
OS01G0663800	Os01g0663800	LOC_Os01g47430	protein of unknown function DUF1296 domain containing protein, expressed
OS01G0667750	Os01g0667750	LOC_Os01g47745	expressed protein
OS01G0670100	Os01g0670100	LOC_Os01g48000	S-locus-like receptor protein kinase, putative, expressed
OS01G0670800	Os01g0670800	LOC_Os01g48060	auxin response factor, putative, expressed
OS01G0672700	Os01g0672700	LOC_Os01g48210	PAP/25A associated domain containing protein, putative, expressed
OS01G0673900	Os01g0673900	LOC_Os01g48310	expressed protein
OS01G0678400	Os01g0678400	LOC_Os01g48660	expressed protein
OS01G0689900	Os01g0689900	LOC_Os01g49529	OsWAK10d - OsWAK receptor-like cytoplasmic kinase OsWAK-RLCK, expressed
OS01G0690800	Os01g0690800,Os01g0690900	LOC_Os01g49614	Protein kinase domain containing protein, expressed
OS01G0693900	Os01g0693900	LOC_Os01g49900	peptidyl-tRNA hydrolase, mitochondrial precursor protein, putative, expressed
OS01G0701500	Os01g0701500	LOC_Os01g50590	cytochrome P450, putative, expressed
OS01G0701600	OS01G0701600	NULL	NULL
OS01G0708700	Os01g0708700	LOC_Os01g51230	IQ calmodulin-binding motif domain containing protein, expressed
OS01G0709000	Os01g0709000	LOC_Os01g51260	MYB family transcription factor, putative, expressed
OS01G0711200	Os01g0711200	LOC_Os01g51400	Leucine Rich Repeat family protein, expressed
OS01G0712501	OS01G0712501	NULL	NULL
OS01G0736400	Os01g0736400	LOC_Os01g53450	aminotransferase, classes I and II, domain containing protein, expressed
OS01G0737500	Os01g0737500	LOC_Os01g53570	aluminum-activated malate transporter, putative, expressed
OS01G0737900	Os01g0737900	LOC_Os01g53610	selenium-binding protein, related, putative, expressed
OS01G0741300	OS01G0741300	NULL	NULL
OS01G0742200	Os01g0742200	LOC_Os01g53900	elongation factor, putative, expressed
OS01G0742400	Os01g0742400	LOC_Os01g53920	receptor-like protein kinase 5 precursor, putative, expressed
OS01G0744300	Os01g0744300	LOC_Os01g54100	CK1_CaseinKinase_1a.2 - CK1 includes the casein kinase 1 kinases, expressed
OS01G0744350	OS01G0744350	NULL	NULL
OS01G0745300	Os01g0745300	LOC_Os01g54190	expressed protein
OS01G0745400	OS01G0745400	NULL	NULL
OS01G0748950	Os01g0748950	LOC_Os01g54515	peptide transporter PTR2, putative, expressed
OS01G0752500	Os01g0752500	LOC_Os01g54890	ethylene-responsive transcription factor 2, putative, expressed
OS01G0754200	Os01g0754200	LOC_Os01g55040	1,3-beta-glucan synthase component, putative, expressed
OS01G0755100	Os01g0755100	LOC_Os01g55094	expressed protein
OS01G0759200	Os01g0759200	LOC_Os01g55440	CAMK_KIN1/SNF1/Nim1_like.1 - CAMK includes calcium/calmodulin depedent protein kinases, expressed
OS01G0761000	Os01g0761000	LOC_Os01g55570	expressed protein
OS01G0761100	Os01g0761100	LOC_Os01g55580	tesmin/TSO1-like CXC domain containing protein, expressed
OS01G0765600	Os01g0765600	LOC_Os01g56030	EF hand family protein, putative, expressed
OS01G0768100	Os01g0768100	LOC_Os01g56220	expressed protein
OS01G0773000	Os01g0773000	LOC_Os01g56620	pseudouridylate synthase, putative, expressed
OS01G0780400	Os01g0780400	LOC_Os01g57210	katanin p80 WD40 repeat-containing subunit B1 homolog 1, putative, expressed
OS01G0780600	Os01g0780600	LOC_Os01g57230	BTBN1 - Bric-a-Brac, Tramtrack, Broad Complex BTB domain with non-phototropic hypocotyl 3 NPH3 and coiled-coil domains, expressed
OS01G0781200	Os01g0781200	LOC_Os01g57280	rp1, putative, expressed
OS01G0782200	Os01g0782200	LOC_Os01g57350	diacylglycerol kinase, putative, expressed
OS01G0788900	Os01g0788900	LOC_Os01g57900	PPR repeat domain containing protein, putative, expressed
OS01G0797900	Os01g0797900	LOC_Os01g58444	expressed protein
OS01G0798800	Os01g0798800	LOC_Os01g58500	expressed protein
OS01G0801901	Os01g0801901	LOC_Os01g58760	bZIP transcription factor domain containing protein, expressed
OS01G0802000	Os01g0802000	LOC_Os01g58780	zinc finger, C3HC4 type domain containing protein, expressed
OS01G0807266	Os01g0807266	LOC_Os01g59265	expressed protein
OS01G0810500	Os01g0810500	LOC_Os01g59550	senescence-induced receptor-like serine/threonine-protein kinase precursor, putative, expressed
OS01G0810600	Os01g0810600	LOC_Os01g59560	protein kinase domain containing protein, expressed
OS01G0810700	OS01G0810700	NULL	NULL
OS01G0810800	Os01g0810800	LOC_Os01g59570	senescence-induced receptor-like serine/threonine-protein kinase precursor, putative, expressed
OS01G0811001	Os01g0811001	LOC_Os01g59580	retrotransposon protein, putative, unclassified, expressed
OS01G0811400	Os01g0811400	LOC_Os01g59630	exostosin family domain containing protein, expressed
OS01G0813500	Os01g0813500	LOC_Os01g59800	EAP30/Vps36 family domain containing protein, expressed
OS01G0814000	Os01g0814000	LOC_Os01g59860	expressed protein
OS01G0814800	Os01g0814800	LOC_Os01g59920	cysteine synthase, chloroplast precursor, putative, expressed
OS01G0816000	Os01g0816000	LOC_Os01g60010	PPR repeat domain containing protein, putative, expressed
OS01G0816500	Os01g0816500	LOC_Os01g60050	HEAT, putative, expressed
OS01G0819000	Os01g0819000	LOC_Os01g60309	retrotransposon protein, putative, Ty1-copia subclass, expressed
OS01G0819700	Os01g0819700	LOC_Os01g60420	expressed protein
OS01G0823500	Os01g0823500	LOC_Os01g60810	DUF623 domain containing protein, expressed
OS01G0832100	Os01g0832100	LOC_Os01g61570	GDSL-like lipase/acylhydrolase, putative, expressed
OS01G0836700	Os01g0836700	LOC_Os01g61960	GPR107 precursor, putative, expressed
OS01G0840700	Os01g0840700	LOC_Os01g62350	60S ribosomal protein L36-2, putative, expressed
OS01G0841450	OS01G0841450	NULL	NULL
OS01G0844800	Os01g0844800	LOC_Os01g62650	pumilio-family RNA binding protein, putative, expressed
OS01G0846000	Os01g0846000	LOC_Os01g62750	expressed protein
OS01G0852200	Os01g0852200	LOC_Os01g63290	transporter, major facilitator family, putative, expressed
OS01G0857400	Os01g0857400	LOC_Os01g63854	transmembrane amino acid transporter protein, putative, expressed
OS01G0858000	Os01g0858000	LOC_Os01g63910	AT hook motif family protein, expressed
OS01G0860450	OS01G0860450	NULL	NULL
OS01G0860500	Os01g0860500	LOC_Os01g64110	glycosyl hydrolase, putative, expressed
OS01G0864500	Os01g0864500	LOC_Os01g64470	harpin-induced protein 1 domain containing protein, expressed
OS01G0868300	Os01g0868300	LOC_Os01g64820	POLA1 - Putative DNA polymerase alpha catalytic subunit, expressed
OS01G0870300	Os01g0870201,Os01g0870300	LOC_Os01g64990	GPI transamidase subunit PIG-U domain containing protein, expressed
OS01G0872900	Os01g0872900	LOC_Os01g65240	transposon protein, putative, Pong sub-class, expressed
OS01G0877300	Os01g0877300	LOC_Os01g65580	mitotic checkpoint family protein, putative, expressed
OS01G0880400	Os01g0880400	LOC_Os01g65800	powdery mildew resistant protein 5, putative, expressed
OS01G0881000	Os01g0881000	LOC_Os01g65850	CHD3-type chromatin-remodeling factor PICKLE, putative, expressed
OS01G0885500	Os01g0885500	LOC_Os01g66230	csAtPR5, putative, expressed
OS01G0886350	OS01G0886350	NULL	NULL
OS01G0892500	Os01g0892500	LOC_Os01g66840	pectinacetylesterase domain containing protein, expressed
OS01G0896500	Os01g0896500	LOC_Os01g67120	rhodanese-like domain containing protein, putative, expressed
OS01G0898300	Os01g0898300	LOC_Os01g67290	cyclin-related protein, putative, expressed
OS01G0898400	Os01g0898400	LOC_Os01g67300	expressed protein
OS01G0901000	Os01g0901000	LOC_Os01g67500	armadillo/beta-catenin repeat family protein, putative, expressed
OS01G0905400	Os01g0905400	LOC_Os01g67830	B3 DNA binding domain containing protein, expressed
OS01G0906200	Os01g0906200	LOC_Os01g67880	vacuolar protein sorting-associated protein 53, putative, expressed
OS01G0908200	Os01g0908200	LOC_Os01g68020	BTBZ2 - Bric-a-Brac, Tramtrack, and Broad Complex BTB domain with TAZ zinc finger and Calmodulin-binding domains, expressed
OS01G0908800	Os01g0908800	LOC_Os01g68070	PPR repeat containing protein, expressed
OS01G0911300	Os01g0911300	LOC_Os01g68330	antigen peptide transporter-like 1, chloroplast precursor, putative, expressed
OS01G0914600	Os01g0914600	LOC_Os01g68610	pentatricopeptide repeat protein PPR1106-17, putative, expressed
OS01G0915400	Os01g0915300,Os01g0915400	LOC_Os01g68680	tetratricopeptide repeat domain containing protein, expressed
OS01G0915900	Os01g0915900	LOC_Os01g68720	keratin, type I cytoskeletal 9, putative, expressed
OS01G0919150	OS01G0919150	NULL	NULL
OS01G0925300	Os01g0925300	LOC_Os01g70100	zinc finger DHHC domain-containing protein, putative, expressed
OS01G0927400	Os01g0927400	LOC_Os01g70250	heat shock protein DnaJ, putative, expressed
OS01G0934300	Os01g0934300	LOC_Os01g70810	homeobox domain containing protein, expressed
OS01G0934400	Os01g0934350,Os01g0934400	LOC_Os01g70820	lumenal PsbP, putative, expressed
OS01G0936700	Os01g0936700	LOC_Os01g71040	expressed protein
OS01G0937300	Os01g0937300	LOC_Os01g71100	expressed protein
OS01G0939300	Os01g0939300	LOC_Os01g71256	expressed protein
OS01G0941200	Os01g0941200	LOC_Os01g71380	glycosyl hydrolases family 17, putative, expressed
OS01G0948500	Os01g0948500	LOC_Os01g72000	armadillo repeat-containing protein, putative, expressed
OS01G0952300	Os01g0952300	LOC_Os01g72320	FYVE zinc finger domain containing protein, expressed
OS01G0957900	Os01g0957900	LOC_Os01g72780	expressed protein
OS01G0967000	Os01g0967000	LOC_Os01g73604	LSM domain containing protein, expressed
OS01G0967800	Os01g0967800	LOC_Os01g73670	expressed protein
OS01G0968000	Os01g0968000	LOC_Os01g73690	pentatricopeptide, putative, expressed
OS01G0974100	OS01G0974100	NULL	NULL
OS01G0976800	Os01g0976800	LOC_Os01g74540	GATA zinc finger domain containing protein, expressed
OS01G0977600	Os01g0977600	LOC_Os01g74610	zinc finger, C3HC4 type domain containing protein, expressed
OS02G0104700	Os02g0104700	LOC_Os02g01440	nitric oxide synthase 1, putative, expressed
OS02G0105100	Os02g0105100	LOC_Os02g01490	expressed protein
OS02G0105800	Os02g0105800	LOC_Os02g01550	OsFBL6 - F-box domain and LRR containing protein, expressed
OS02G0109100	Os02g0109100	LOC_Os02g01920	GHMP kinases ATP-binding protein, putative, expressed
OS02G0113300	Os02g0113300	LOC_Os02g02240	expressed protein
OS02G0113800	Os02g0113800	LOC_Os02g02270	expressed protein
OS02G0127700	Os02g0127700	LOC_Os02g03540	phosphoribosyl transferase, putative, expressed
OS02G0132500	Os02g0132500	LOC_Os02g03960	CPuORF1 - conserved peptide uORF-containing transcript, expressed
OS02G0136400	Os02g0136400	LOC_Os02g04380	expressed protein
OS02G0141100	Os02g0141100	LOC_Os02g04810	auxin response factor 5, putative, expressed
OS02G0141500	Os02g0141500	LOC_Os02g04860	expressed protein
OS02G0142875	OS02G0142875	NULL	NULL
OS02G0145600	OS02G0145600	NULL	NULL
OS02G0146400	Os02g0146400	LOC_Os02g05310	splicing factor 3B subunit 1, putative, expressed
OS02G0146700	Os02g0146700	LOC_Os02g05340	proteasome/cyclosome repeat containing protein, expressed
OS02G0147100	Os02g0147100	LOC_Os02g05365	expressed protein
OS02G0147850	OS02G0147850	NULL	NULL
OS02G0148700	OS02G0148700	NULL	NULL
OS02G0153100	Os02g0153100	LOC_Os02g05910	phytosulfokine receptor precursor, putative, expressed
OS02G0153200	Os02g0153200	LOC_Os02g05920	phytosulfokine receptor precursor, putative, expressed
OS02G0153450	OS02G0153450	NULL	NULL
OS02G0153500	Os02g0153500	LOC_Os02g05940	phytosulfokine receptor precursor, putative, expressed
OS02G0153700	Os02g0153700	LOC_Os02g05950	phytosulfokine receptor precursor, putative, expressed
OS02G0155400	Os02g0155400	LOC_Os02g06090	phytosulfokine receptor precursor, putative, expressed
OS02G0155600	Os02g0155600,Os02g0155650,Os02g0155750	LOC_Os02g06120	Leucine Rich Repeat family protein, expressed
OS02G0156200	Os02g0156200	LOC_Os02g06180	phytosulfokine receptor precursor, putative, expressed
OS02G0156633	Os02g0156633	LOC_Os02g06205	phytosulfokine receptor precursor, putative, expressed
OS02G0157200	Os02g0157200	LOC_Os02g06260	phytosulfokine receptor precursor, putative, expressed
OS02G0162600	OS02G0162600	NULL	NULL
OS02G0164000	Os02g0164000	LOC_Os02g06830	expressed protein
OS02G0167100	Os02g0167100	LOC_Os02g07044	rhodanese-like domain containing protein, putative, expressed
OS02G0172850	Os02g0172850	LOC_Os02g07654	expressed protein
OS02G0177300	Os02g0177300	LOC_Os02g08070	OsSPL5 - SBP-box gene family member, expressed
OS02G0179600	Os02g0179600	LOC_Os02g08330	gp176, putative, expressed
OS02G0179800	Os02g0179800	LOC_Os02g08350	expressed protein
OS02G0181400	Os02g0181400	LOC_Os02g08450	transposon protein, putative, CACTA, En/Spm sub-class, expressed
OS02G0185200	Os02g0185200	LOC_Os02g09240	cytochrome P450 71D8, putative, expressed
OS02G0185400	Os02g0185400	LOC_Os02g09260	cytochrome P450 71A1, putative, expressed
OS02G0187200	Os02g0187200	LOC_Os02g09430	exostosin family domain containing protein, expressed
OS02G0189800	OS02G0189800	NULL	NULL
OS02G0190300	Os02g0190300	LOC_Os02g09720	multidrug resistance protein, putative, expressed
OS02G0192200	Os02g0192200	LOC_Os02g09900	transposon protein, putative, unclassified, expressed
OS02G0193933	OS02G0193933	NULL	NULL
OS02G0194800	Os02g0194800	LOC_Os02g10130	tubulin binding cofactor C, putative, expressed
OS02G0202250	Os02g0202250	LOC_Os02g10790	expressed protein
OS02G0202800	Os02g0202800	LOC_Os02g10840	transposon protein, putative, unclassified, expressed
OS02G0202900	Os02g0202900	LOC_Os02g10850	OsFBK3 - F-box domain and kelch repeat containing protein, expressed
OS02G0202950	Os02g0202950,Os02g0203000	LOC_Os02g10860	bZIP transcription factor domain containing protein, expressed
OS02G0207400	Os02g0207400	LOC_Os02g11700	cytokinin-O-glucosyltransferase 3, putative, expressed
OS02G0208900	Os02g0208900	LOC_Os02g11820	GTPase-activating protein, putative, expressed
OS02G0214500	Os02g0214500	LOC_Os02g12310	no apical meristem protein, putative, expressed
OS02G0214900	Os02g0214900	LOC_Os02g12350	histone deacetylase, putative, expressed
OS02G0218700	Os02g0218700	LOC_Os02g12680	cytochrome P450, putative, expressed
OS02G0221300	Os02g0221300	LOC_Os02g12840	DEAD-box ATP-dependent RNA helicase, putative, expressed
OS02G0222500	Os02g0222500	LOC_Os02g12939	expressed protein
OS02G0224800	Os02g0224800	LOC_Os02g13150	pollen-specific protein SF21, putative, expressed
OS02G0227600	Os02g0227600	LOC_Os02g13420	leucine-rich repeat receptor protein kinase EXS precursor, putative, expressed
OS02G0227700	Os02g0227700	LOC_Os02g13430	receptor-like protein kinase 5 precursor, putative, expressed
OS02G0228300	Os02g0228300	LOC_Os02g13510	receptor-like protein kinase 5 precursor, putative, expressed
OS02G0232100	Os02g0232100	LOC_Os02g13810	DNA binding protein, putative, expressed
OS02G0232500	Os02g0232500	LOC_Os02g13850	leucine-rich repeat-containing protein kinase family protein, putative, expressed
OS02G0246101	Os02g0246101	LOC_Os02g14855	expressed protein
OS02G0247800	Os02g0247800	LOC_Os02g14980	calcium-binding EF hand family protein, putative, expressed
OS02G0254550	Os02g0254550	LOC_Os02g15520	transposon protein, putative, unclassified, expressed
OS02G0260700	Os02g0260700	LOC_Os02g16000	E1-BTB1 - Bric-a-Brac, Tramtrack, and Broad Complex domain with E1 subfamily conserved sequence, expressed
OS02G0265300	Os02g0265300	LOC_Os02g16544	expressed protein
OS02G0274100	Os02g0274100	LOC_Os02g17390	3-hydroxyacyl-CoA dehydrogenase, putative, expressed
OS02G0277700	Os02g0277700	LOC_Os02g17710	receptor-like protein kinase 5 precursor, putative, expressed
OS02G0278450	OS02G0278450	NULL	NULL
OS02G0282000	Os02g0282000	LOC_Os02g18080	NB-ARC domain containing protein, expressed
OS02G0286933	Os02g0286933	LOC_Os02g18540	uncharacterized Cys-rich domain containing protein, putative, expressed
OS02G0288400	Os02g0288400	LOC_Os02g18670	ABC transporter family protein, putative, expressed
OS02G0288925	Os02g0288925	LOC_Os02g18720	expressed protein
OS02G0302500	Os02g0302500	LOC_Os02g19950	expressed protein
OS02G0320000	Os02g0319900,Os02g0320000	LOC_Os02g21500	PE-PGRS family protein, putative, expressed
OS02G0320100	Os02g0320100	LOC_Os02g21510	NOL1/NOP2/sun family protein, putative, expressed
OS02G0321000	Os02g0321000	LOC_Os02g21570	expressed protein
OS02G0326500	Os02g0326500	LOC_Os02g22084	expressed protein
OS02G0331200	Os02g0331200	LOC_Os02g22650	glycosyltransferase, putative, expressed
OS02G0446100	Os02g0446100	LOC_Os02g24800	retrotransposon protein, putative, unclassified, expressed
OS02G0451501	OS02G0451501	NULL	NULL
OS02G0457300	Os02g0457300	LOC_Os02g25940	Core histone H2A/H2B/H3/H4 domain containing protein, putative, expressed
OS02G0457500	Os02g0457500	LOC_Os02g25960	ankyrin repeat family protein, putative, expressed
OS02G0462401	Os02g0462300,Os02g0462401	LOC_Os02g26400	nuclease, EndA/NucM family protein, expressed
OS02G0464700	OS02G0464700	NULL	NULL
OS02G0465500	Os02g0465500	LOC_Os02g26660	exonuclease, putative, expressed
OS02G0468100	Os02g0468100	LOC_Os02g26840	O-acyltransferase, putative, expressed
OS02G0489550	Os02g0489550	LOC_Os02g28830	tetratricopeptide repeat domain containing protein, expressed
OS02G0490000	Os02g0490000	LOC_Os02g28870	U-box domain-containing protein, putative, expressed
OS02G0494700	Os02g0494700	LOC_Os02g29230	expressed protein
OS02G0497700	Os02g0497700	LOC_Os02g29480	RNA-binding protein-like, putative, expressed
OS02G0510200	Os02g0510200	LOC_Os02g30630	thiamine pyrophosphate enzyme, C-terminal TPP binding domain containing protein, expressed
OS02G0515000	Os02g0515000	LOC_Os02g31070	expressed protein
OS02G0516800	Os02g0516800	LOC_Os02g31160	transcription factor, putative, expressed
OS02G0516901	OS02G0516901	NULL	NULL
OS02G0517333	Os02g0517333	LOC_Os02g31230	expressed protein
OS02G0517900	Os02g0517900	LOC_Os02g31860	expressed protein
OS02G0518500	Os02g0518500	LOC_Os02g31890	ZOS2-08 - C2H2 zinc finger protein, expressed
OS02G0522100	Os02g0522100	LOC_Os02g32230	retrotransposon protein, putative, unclassified, expressed
OS02G0523500	Os02g0523500	LOC_Os02g32350	TUDOR protein with multiple SNc domains, putative, expressed
OS02G0529800	Os02g0529800	LOC_Os02g32770	cytochrome P450, putative, expressed
OS02G0529900	Os02g0529900	LOC_Os02g32780	pentatricopeptide, putative, expressed
OS02G0534700	Os02g0534700	LOC_Os02g33130	pectinesterase inhibitor domain containing protein, putative, expressed
OS02G0536400	Os02g0536400	LOC_Os02g33320	RNA recognition motif containing protein, putative, expressed
OS02G0542600	OS02G0542600	NULL	NULL
OS02G0543800	Os02g0543800	LOC_Os02g33930	expressed protein
OS02G0550700	Os02g0550700	LOC_Os02g34570	exosome complex exonuclease, putative, expressed
OS02G0553000	Os02g0553000	LOC_Os02g34790	receptor-like protein kinase 5 precursor, putative, expressed
OS02G0558100	Os02g0558100	LOC_Os02g35190	chloride channel protein, putative, expressed
OS02G0569400	Os02g0569400	LOC_Os02g36070	cytochrome P450, putative, expressed
OS02G0571900	Os02g0571900	LOC_Os02g36280	cytochrome P450, putative, expressed
OS02G0574500	Os02g0574500	LOC_Os02g36490	expressed protein
OS02G0574600	Os02g0574600	LOC_Os02g36500	expressed protein
OS02G0574701	OS02G0574701	NULL	NULL
OS02G0576600	Os02g0576600	LOC_Os02g36700	sucrose transporter BoSUT1, putative, expressed
OS02G0577300	Os02g0577300	LOC_Os02g36770	galactosyltransferase family protein, putative, expressed
OS02G0577400	OS02G0577400	NULL	NULL
OS02G0588300	Os02g0588300	LOC_Os02g37580	fimbrin-like protein 2, putative, expressed
OS02G0589700	Os02g0589700	LOC_Os02g37700	lecithin:cholesterol acyltransferase, putative, expressed
OS02G0591500	Os02g0591500	LOC_Os02g37850	expressed protein
OS02G0599200	Os02g0599200	LOC_Os02g38710	protein phosphatase 2C containing protein, expressed
OS02G0602000	Os02g0602000	LOC_Os02g39000	remorin C-terminal domain containing protein, putative, expressed
OS02G0602100	Os02g0602100	LOC_Os02g39010	cyclin-dependent kinase G-1, putative, expressed
OS02G0611500	Os02g0611500	LOC_Os02g39840	eukaryotic initiation factor iso-4F subunit p82-34, putative, expressed
OS02G0616100	Os02g0616100	LOC_Os02g40260	uncharacterized protein At4g06744 precursor, putative, expressed
OS02G0616300	Os02g0616300	LOC_Os02g40280	piwi domain containing protein, putative, expressed
OS02G0617000	Os02g0617000,Os02g0617075	LOC_Os02g40400	expressed protein
OS02G0620100	Os02g0620100	LOC_Os02g40680	mis12 protein, expressed
OS02G0627900	Os02g0627900	LOC_Os02g41760	NB-ARC domain containing protein, expressed
OS02G0632700	OS02G0632700	NULL	NULL
OS02G0632800	Os02g0632800	LOC_Os02g42150	OsWAK14 - OsWAK receptor-like protein kinase, expressed
OS02G0632850	OS02G0632850	NULL	NULL
OS02G0636300	Os02g0636300	LOC_Os02g42406	DEAD-box ATP-dependent RNA helicase, putative, expressed
OS02G0640200	Os02g0640200	LOC_Os02g42730	expressed protein
OS02G0644900	Os02g0644900	LOC_Os02g43110	sodium/calcium exchanger 1 precursor, putative, expressed
OS02G0651000	Os02g0651000	LOC_Os02g43480	expressed protein
OS02G0654400	Os02g0654400	LOC_Os02g43750	transcription initiation factor, putative, expressed
OS02G0662200	Os02g0662200	LOC_Os02g44330	rho guanine nucleotide exchange factor, putative, expressed
OS02G0663300	Os02g0663300	LOC_Os02g44380	WD domain containing protein, putative, expressed
OS02G0664100	OS02G0664100	NULL	NULL
OS02G0664400	Os02g0664400	LOC_Os02g44530	expressed protein
OS02G0669000	Os02g0669000	LOC_Os02g44860	GDSL-like lipase/acylhydrolase, putative, expressed
OS02G0673500	Os02g0673500	LOC_Os02g45170	helix-loop-helix DNA-binding protein, putative, expressed
OS02G0681000	Os02g0681000	LOC_Os02g45690	uncharacterized mscS family protein, putative, expressed
OS02G0684100	Os02g0684100	LOC_Os02g45890	sulfotransferase domain containing protein, expressed
OS02G0687500	Os02g0687500	LOC_Os02g46220	expressed protein
OS02G0704933	OS02G0704933	NULL	NULL
OS02G0709400	Os02g0709400	LOC_Os02g47970	calpain, putative, expressed
OS02G0712600	Os02g0712600	LOC_Os02g48200	lectin-like protein kinase, putative, expressed
OS02G0713900	Os02g0713900	LOC_Os02g48330	3-hydroxy-3-methylglutaryl-coenzyme A reductase, putative, expressed
OS02G0714000	Os02g0714000	LOC_Os02g48340	RNA recognition motif containing protein, putative, expressed
OS02G0722001	Os02g0722001	LOC_Os02g49030	tyrosyl-tRNA synthetase, putative, expressed
OS02G0724600	Os02g0724600	LOC_Os02g49270	NOL1/NOP2/sun family protein, putative, expressed
OS02G0733001	Os02g0733001	LOC_Os02g50020	expressed protein
OS02G0735800	Os02g0735800	LOC_Os02g50280	pentatricopeptide, putative, expressed
OS02G0736200	Os02g0736200	LOC_Os02g50330	RNA-dependent RNA polymerase, putative, expressed
OS02G0738350	OS02G0738350	NULL	NULL
OS02G0742000	Os02g0742000	LOC_Os02g50840	BAH domain containing protein, putative, expressed
OS02G0759500	Os02g0759500	LOC_Os02g52220	PPR repeat domain containing protein, putative, expressed
OS02G0760600	Os02g0760600	LOC_Os02g52316	BTB/POZ domain containing protein, putative, expressed
OS02G0762100	Os02g0762100	LOC_Os02g52450	regulator of ribonuclease, putative, expressed
OS02G0768750	Os02g0768750,Os02g0768800,Os02g0768950	LOC_Os02g52960	PHD-finger domain containing protein, putative, expressed
OS02G0770100	Os02g0770100	LOC_Os02g53070	HYS1, putative, expressed
OS02G0772150	Os02g0772150	LOC_Os02g53240	expressed protein
OS02G0773800	Os02g0773800	LOC_Os02g53384	expressed protein
OS02G0776600	Os02g0776600	LOC_Os02g53660	expressed protein
OS02G0776700	Os02g0776700	LOC_Os02g53670	MYB family transcription factor, putative, expressed
OS02G0777100	Os02g0777100	LOC_Os02g53700	DENN domain containing protein, expressed
OS02G0778300	Os02g0778300	LOC_Os02g53780	expressed protein
OS02G0779500	OS02G0779500	NULL	NULL
OS02G0780200	Os02g0780200	LOC_Os02g53970	OsSub24 - Putative Subtilisin homologue, expressed
OS02G0780500	Os02g0780500	LOC_Os02g53990	cyclin-related protein, putative, expressed
OS02G0783000	Os02g0783000	LOC_Os02g54190	pectinesterase, putative, expressed
OS02G0783050	OS02G0783050	NULL	NULL
OS02G0787600	Os02g0787600	LOC_Os02g54640	glutamate receptor, putative, expressed
OS02G0790500	Os02g0790500	LOC_Os02g54820	trehalose-6-phosphate synthase, putative, expressed
OS02G0791800	Os02g0791800	LOC_Os02g54910	atATG18b, putative, expressed
OS02G0793100	Os02g0793100	LOC_Os02g55010	expressed protein
OS02G0796100	Os02g0796100	LOC_Os02g55280	NLI interacting factor-like phosphatase, putative, expressed
OS02G0798900	Os02g0798900	LOC_Os02g55550	F-box/LRR-repeat protein 14, putative, expressed
OS02G0799100	Os02g0799100	LOC_Os02g55570	shugoshin-1, putative, expressed
OS02G0799700	Os02g0799700	LOC_Os02g55610	serine-rich protein, putative, expressed
OS02G0805800	Os02g0805800	LOC_Os02g56200	ELMO/CED-12 family protein, putative, expressed
OS02G0809500	Os02g0809500	LOC_Os02g56500	expressed protein
OS02G0812000	Os02g0812000	LOC_Os02g56720	cinnamoyl CoA reductase, putative, expressed
OS02G0813083	Os02g0813000,Os02g0813083	LOC_Os02g56810	OsFBX68 - F-box domain containing protein, expressed
OS02G0815200	Os02g0815200	LOC_Os02g57010	RNA recognition motif containing protein, putative, expressed
OS02G0816400	Os02g0816400	LOC_Os02g57140	expressed protein
OS02G0816900	Os02g0816900	LOC_Os02g57190	Myosin head domain containing protein, expressed
OS02G0818450	Os02g0818450	LOC_Os02g57305	disease resistance protein, putative, expressed
OS02G0818500	Os02g0818500	LOC_Os02g57310	pib, putative, expressed
OS02G0818800	Os02g0818800	LOC_Os02g57340	tetratricopeptide-like helical, putative, expressed
OS02G0819500	Os02g0819500	LOC_Os02g57410	OTU-like cysteine protease family protein, putative, expressed
OS02G0820200	Os02g0820200	LOC_Os02g57460	RING-H2 finger protein ATL5G, putative, expressed
OS02G0822900	Os02g0822900	LOC_Os02g57700	protein kinase, putative, expressed
OS02G0824000	Os02g0824000	LOC_Os02g57800	PPR repeat containing protein, expressed
OS02G0826000	Os02g0826000	LOC_Os02g57960	Leucine Rich Repeat family protein, expressed
OS02G0827300	Os02g0827300	LOC_Os02g58090	PSP domain containing protein, expressed
OS02G0828100	Os02g0828100	LOC_Os02g58160	expressed protein
OS02G0829600	Os02g0829600	LOC_Os02g58270	metallo-beta-lactamase family protein, putative, expressed
OS02G0829850	Os02g0829850	LOC_Os02g58310	expressed protein
OS03G0106850	OS03G0106850	NULL	NULL
OS03G0110500	Os03g0110500	LOC_Os03g01980	KIP1, putative, expressed
OS03G0111600	Os03g0111600	LOC_Os03g02090	expressed protein
OS03G0111800	Os03g0111800	LOC_Os03g02110	WD domain, G-beta repeat domain containing protein, expressed
OS03G0112700	Os03g0112700	LOC_Os03g02160	zinc finger C-x8-C-x5-C-x3-H type family protein, expressed
OS03G0115300	Os03g0115300	LOC_Os03g02430	PPR repeat domain containing protein, putative, expressed
OS03G0117800	Os03g0117800	LOC_Os03g02640	methylthioribose kinase, putative, expressed
OS03G0119500	OS03G0119500	NULL	NULL
OS03G0120100	Os03g0120100	LOC_Os03g02830	cell cycle control protein, putative, expressed
OS03G0124300	Os03g0124300	LOC_Os03g03290	receptor-like protein kinase At3g46290 precursor, putative, expressed
OS03G0127600	Os03g0127600	LOC_Os03g03560	FHA domain containing protein, putative, expressed
OS03G0128932	Os03g0128932	LOC_Os03g03680	transporter family protein, putative, expressed
OS03G0129100	Os03g0129100	LOC_Os03g03700	MLO domain containing protein, putative, expressed
OS03G0145500	Os03g0145500	LOC_Os03g05200	DENN domain containing protein, expressed
OS03G0152400	Os03g0152400	LOC_Os03g05780	4-coumarate--CoA ligase-like 7, putative, expressed
OS03G0152900	Os03g0152900	LOC_Os03g05820	kinesin motor domain containing protein, expressed
OS03G0156000	Os03g0156000	LOC_Os03g06050	expansin precursor, putative, expressed
OS03G0159700	Os03g0159700	LOC_Os03g06370	PPR repeat domain containing protein, putative, expressed
OS03G0161100	Os03g0161100	LOC_Os03g06510	KIP1, putative, expressed
OS03G0162800	Os03g0162800	LOC_Os03g06705	3-ketoacyl-CoA synthase, putative, expressed
OS03G0163100	Os03g0163100	LOC_Os03g06720	expressed protein
OS03G0163150	OS03G0163150	NULL	NULL
OS03G0165050	OS03G0165050	NULL	NULL
OS03G0165266	Os03g0165200,Os03g0165266	LOC_Os03g06920	DRD1, putative, expressed
OS03G0169300	Os03g0169300	LOC_Os03g07330	pentatricopeptide, putative, expressed
OS03G0170200	Os03g0170200	LOC_Os03g07410	expressed protein
OS03G0172000	Os03g0172000	LOC_Os03g07580	OsNucAP1 - Putative Nucleoporin Autopeptidase homologue, expressed
OS03G0173700	Os03g0173700	LOC_Os03g07750	expressed protein
OS03G0177100	Os03g0177100	LOC_Os03g07994	expressed protein
OS03G0181400	Os03g0181400	LOC_Os03g08350	ubiquitin carboxyl-terminal hydrolase, family 1, putative, expressed
OS03G0187100	Os03g0187100	LOC_Os03g08820	expressed protein
OS03G0197900	Os03g0197900	LOC_Os03g10150	DUF623 domain containing protein, expressed
OS03G0213300	Os03g0213300	LOC_Os03g11460	expressed protein
OS03G0213900	Os03g0213900	LOC_Os03g11520	expressed protein
OS03G0214000	Os03g0214000	LOC_Os03g11530	nucleotide pyrophosphatase/phosphodiesterase, putative, expressed
OS03G0218200	Os03g0218200	LOC_Os03g11874	expressed protein
OS03G0225300	Os03g0225300	LOC_Os03g12430	PPR repeat containing protein, putative, expressed
OS03G0225500	Os03g0225500	LOC_Os03g12450	nucleoporin, putative, expressed
OS03G0227000	Os03g0227000	LOC_Os03g12590	coatomer subunit gamma-1, putative, expressed
OS03G0233700	Os03g0233700	LOC_Os03g13120	expressed protein
OS03G0235200	Os03g0235200	LOC_Os03g13230	pentatricopeptide, putative, expressed
OS03G0237401	OS03G0237401	NULL	NULL
OS03G0244200	Os03g0244200	LOC_Os03g14050	thaumatin-like protein 1 precursor, putative, expressed
OS03G0244333	OS03G0244333	NULL	NULL
OS03G0245800	Os03g0245800	LOC_Os03g14180	hsp20/alpha crystallin family protein, putative, expressed
OS03G0247300	Os03g0247300	LOC_Os03g14310	expressed protein
OS03G0251350	Os03g0251350	LOC_Os03g14669	core histone H2A/H2B/H3/H4, putative, expressed
OS03G0251700	Os03g0251700	LOC_Os03g14710	protein kinase, putative, expressed
OS03G0258500	Os03g0258500	LOC_Os03g15290	beclin-1, putative, expressed
OS03G0262300	Os03g0262300	LOC_Os03g15580	AT hook motif family protein, expressed
OS03G0264000	Os03g0264000	LOC_Os03g15750	ASC1, putative, expressed
OS03G0269100	Os03g0269100	LOC_Os03g16230	oxidoreductase, short chain dehydrogenase/reductase family protein, putative, expressed
OS03G0276600	Os03g0276600	LOC_Os03g16870	expressed protein
OS03G0278700	Os03g0278700	LOC_Os03g17050	expressed protein
OS03G0278900	Os03g0278900	LOC_Os03g17070	ATP synthase B chain, chloroplast precursor, putative, expressed
OS03G0280700	Os03g0280700	LOC_Os03g17210	expressed protein
OS03G0287600	Os03g0287600,Os03g0287700	LOC_Os03g17840	expressed protein
OS03G0295700	Os03g0295700	LOC_Os03g18440	expressed protein
OS03G0298700	Os03g0298700	LOC_Os03g18710	expressed protein
OS03G0301400	Os03g0301400	LOC_Os03g18940	exonuclease, putative, expressed
OS03G0302200	Os03g0302200	LOC_Os03g19020	PHD-finger family protein, expressed
OS03G0304400	Os03g0304400	LOC_Os03g19190	TOPBP1C - Similar to DNA replication protein TOPBP1 from, expressed
OS03G0307500	OS03G0307500	NULL	NULL
OS03G0307600	OS03G0307600	NULL	NULL
OS03G0307700	Os03g0307700	LOC_Os03g19470	proteins of unknown function domain containing protein, expressed
OS03G0308200	Os03g0308200	LOC_Os03g19520	cyclin-related protein, putative, expressed
OS03G0312350	OS03G0312350	NULL	NULL
OS03G0317000	Os03g0317000	LOC_Os03g20180	ECT protein, putative, expressed
OS03G0317100	Os03g0317100	LOC_Os03g20190	pentatricopeptide, putative, expressed
OS03G0320400	Os03g0320400	LOC_Os03g20430	histone-lysine N-methyltransferase, H3 lysine-9 specific SUVH8, putative, expressed
OS03G0323500	Os03g0323500	LOC_Os03g20720	GTPase-activating protein, putative, expressed
OS03G0323900	Os03g0323900	LOC_Os03g20760	LTPL66 - Protease inhibitor/seed storage/LTP family protein precursor, expressed
OS03G0325000	Os03g0325000	LOC_Os03g20880	pyruvate kinase, putative, expressed
OS03G0328501	Os03g0328501	LOC_Os03g21130	expressed protein
OS03G0330300	Os03g0330300	LOC_Os03g21270	expressed protein
OS03G0334200	Os03g0334200	LOC_Os03g21640	expressed protein
OS03G0343300	Os03g0343300	LOC_Os03g22320	utp14 protein, putative, expressed
OS03G0346700	Os03g0346700	LOC_Os03g22540	jmjC domain containing protein, expressed
OS03G0347200	Os03g0347200	LOC_Os03g22570	MIF4G domain containing protein, putative, expressed
OS03G0348500	Os03g0348500	LOC_Os03g22655	tubby-like F-box protein 3, putative, expressed
OS03G0352700	Os03g0352700	LOC_Os03g22940	expressed protein
OS03G0361500	Os03g0361500	LOC_Os03g24650	terpene synthase family, metal binding domain containing protein, expressed
OS03G0361700	Os03g0361700,Os03g0361866	LOC_Os03g24690	terpene synthase, putative, expressed
OS03G0363100	Os03g0363100	LOC_Os03g24820	expressed protein
OS03G0364700	Os03g0364700	LOC_Os03g24950	expressed protein
OS03G0365900	Os03g0365900,Os03g0365850	LOC_Os03g25040	GDSL-like lipase/acylhydrolase, putative, expressed
OS03G0375717	Os03g0375717	LOC_Os03g25890	retrotransposon protein, putative, unclassified, expressed
OS03G0381100	Os03g0381100	LOC_Os03g26440	tRNA pseudouridine synthase family protein, putative, expressed
OS03G0383600	Os03g0383600	LOC_Os03g26620	3-ketoacyl-CoA synthase, putative, expressed
OS03G0385400	Os03g0385400	LOC_Os03g26820	LTPL52 - Protease inhibitor/seed storage/LTP family protein precursor, expressed
OS03G0387000	Os03g0387000	LOC_Os03g26960	intron-binding protein aquarius, putative, expressed
OS03G0388300	Os03g0388300	LOC_Os03g27054	expressed protein
OS03G0395700	Os03g0395700	LOC_Os03g27830	expressed protein
OS03G0395801	OS03G0395801	NULL	NULL
OS03G0401100	Os03g0401100	LOC_Os03g28300	protein kinase domain containing protein, expressed
OS03G0401951	Os03g0401951	LOC_Os03g28389	expressed protein
OS03G0414100	Os03g0414100	LOC_Os03g30060	expressed protein
OS03G0418700	Os03g0418700	LOC_Os03g30530	expressed protein
OS03G0421000	Os03g0421000	LOC_Os03g30740	expressed protein
OS03G0422800	Os03g0422800	LOC_Os03g30890	S-locus-like receptor protein kinase, putative, expressed
OS03G0422900	Os03g0422900	LOC_Os03g30910	disease resistance protein RPM1, putative, expressed
OS03G0430400	Os03g0430100,Os03g0430400	LOC_Os03g31594	jmjC domain containing protein, expressed
OS03G0431800	Os03g0431600,Os03g0431800	LOC_Os03g31730	expressed protein
OS03G0432900	Os03g0432900	LOC_Os03g31839	transposon protein, putative, unclassified, expressed
OS03G0436500	Os03g0436500	LOC_Os03g32190	transposon protein, putative, unclassified, expressed
OS03G0439900	OS03G0439900	NULL	NULL
OS03G0448200	Os03g0448200	LOC_Os03g33520	exo70 exocyst complex subunit, putative, expressed
OS03G0561400	Os03g0561400	LOC_Os03g36279	retrotransposon protein, putative, Ty3-gypsy subclass, expressed
OS03G0563600	Os03g0563600	LOC_Os03g36560	peroxidase precursor, putative, expressed
OS03G0565300	Os03g0565300	LOC_Os03g36760	expressed protein
OS03G0566700	Os03g0566700	LOC_Os03g36920	disease resistance protein, putative, expressed
OS03G0568400	Os03g0568400	LOC_Os03g37070	cytochrome P450 71E1, putative, expressed
OS03G0569000	Os03g0569000	LOC_Os03g37140	expressed protein
OS03G0571900	Os03g0571900	LOC_Os03g37490	MATE efflux family protein, putative, expressed
OS03G0577100	Os03g0577100	LOC_Os03g38010	nuf2 family protein, expressed
OS03G0579200	Os03g0579200	LOC_Os03g38240	expressed protein
OS03G0583000	Os03g0583000	LOC_Os03g38650	expressed protein
OS03G0583900	Os03g0583900	LOC_Os03g38740	Dicer, putative, expressed
OS03G0584400	Os03g0584400	LOC_Os03g38800	AAA family ATPase, putative, expressed
OS03G0588200	Os03g0588200	LOC_Os03g39129	frigida, putative, expressed
OS03G0591300	Os03g0591300	LOC_Os03g39432	CPuORF31 - conserved peptide uORF-containing transcript, expressed
OS03G0594100	Os03g0594100	LOC_Os03g39690	cytochrome P450, putative, expressed
OS03G0594700	Os03g0594700	LOC_Os03g39740	expressed protein
OS03G0594900	Os03g0594900	LOC_Os03g39760	cytochrome P450, putative, expressed
OS03G0595050	OS03G0595050	NULL	NULL
OS03G0598150	OS03G0598150	NULL	NULL
OS03G0599000	Os03g0599000	LOC_Os03g40194	disease resistance RPP13-like protein 1, putative, expressed
OS03G0605300	Os03g0605300	LOC_Os03g40830	OsSub30 - Putative Subtilisin homologue, expressed
OS03G0612201	OS03G0612201	NULL	NULL
OS03G0612400	Os03g0612400	LOC_Os03g41600	DUF260 domain containing protein, putative, expressed
OS03G0621700	Os03g0621700	LOC_Os03g42380	expressed protein
OS03G0622700	OS03G0622700	NULL	NULL
OS03G0637600	Os03g0637600	LOC_Os03g43650	uncharacterized protein At4g06744 precursor, putative, expressed
OS03G0638200	Os03g0638200	LOC_Os03g43720	transporter family protein, putative, expressed
OS03G0644600	Os03g0644600	LOC_Os03g44250	expressed protein
OS03G0647800	Os03g0647800	LOC_Os03g44560	expp1 protein precursor, putative, expressed
OS03G0648450	Os03g0648450,Os03g0648500	LOC_Os03g44630	plastocyanin-like domain containing protein, putative, expressed
OS03G0653900	Os03g0653900	LOC_Os03g45120	ribosome inactivating protein, putative, expressed
OS03G0654800	Os03g0654800	LOC_Os03g45220	expressed protein
OS03G0655500	Os03g0655500	LOC_Os03g45290	ankyrin repeat domain-containing protein 50, putative, expressed
OS03G0656075	Os03g0656000,Os03g0656075	LOC_Os03g45330	hsp20/alpha crystallin family protein, putative, expressed
OS03G0672400	Os03g0672400	LOC_Os03g46920	expressed protein
OS03G0675000	Os03g0675000	LOC_Os03g47169	Peptidase family C50, putative, expressed
OS03G0679800	Os03g0679800	LOC_Os03g47614	hypothetical protein
OS03G0680100	Os03g0680100	LOC_Os03g47640	expressed protein
OS03G0680200	Os03g0680200	LOC_Os03g47650	ankyrin, putative, expressed
OS03G0680600	Os03g0680600	LOC_Os03g47720	ankyrin, putative, expressed
OS03G0685100	Os03g0685100	LOC_Os03g48050	RNA methyltransferase, TrmH family protein, putative, expressed
OS03G0686300	Os03g0686300	LOC_Os03g48140	myosin, putative, expressed
OS03G0687700	Os03g0687700	LOC_Os03g48220	expressed protein
OS03G0706900	Os03g0706900	LOC_Os03g49900	zinc finger, C3HC4 type domain containing protein, expressed
OS03G0713500	Os03g0713500	LOC_Os03g50550	STE_MEK_ste7_MAP2K.7 - STE kinases include homologs to sterile 7, sterile 11 and sterile 20 from yeast, expressed
OS03G0713550	OS03G0713550	NULL	NULL
OS03G0722100	Os03g0722100	LOC_Os03g51220	SWI/SNF-related matrix-associated actin-dependent regulator of chromatin subfamily C member, putative, expressed
OS03G0725100	Os03g0725050,Os03g0725100	LOC_Os03g51520	fip1 motif family protein, expressed
OS03G0726150	OS03G0726150	NULL	NULL
OS03G0726300	Os03g0726300	LOC_Os03g51620	DUF221 domain containing protein, expressed
OS03G0727200	Os03g0727150,Os03g0727200	LOC_Os03g51710	homeobox protein knotted-1, putative, expressed
OS03G0729300	Os03g0729300	LOC_Os03g51960	expressed protein
OS03G0732200	Os03g0732200	LOC_Os03g52230	dynamin-2B, putative, expressed
OS03G0753500	Os03g0753500	LOC_Os03g54200	expressed protein
OS03G0753600	Os03g0753600	LOC_Os03g54220	expressed protein
OS03G0757750	OS03G0757750	NULL	NULL
OS03G0762800	OS03G0762800	NULL	NULL
OS03G0766500	Os03g0766500	LOC_Os03g55760	MYB family transcription factor, putative, expressed
OS03G0772100	Os03g0772100	LOC_Os03g56140	homeobox protein rough sheath 1, putative, expressed
OS03G0775900	Os03g0775900	LOC_Os03g56450	OsFBX111 - F-box domain containing protein, expressed
OS03G0776150	OS03G0776150	NULL	NULL
OS03G0788700	Os03g0788700	LOC_Os03g57490	fasciclin domain containing protein, expressed
OS03G0789466	Os03g0789466	LOC_Os03g57540	expressed protein
OS03G0789500	Os03g0789500	LOC_Os03g57560	piwi domain containing protein, expressed
OS03G0793450	OS03G0793450	NULL	NULL
OS03G0797902	OS03G0797902	NULL	NULL
OS03G0800200	Os03g0800200	LOC_Os03g58600	PAZ domain containing protein, putative, expressed
OS03G0804600	Os03g0804600	LOC_Os03g58990	cupin domain containing protein, expressed
OS03G0806500	Os03g0806500	LOC_Os03g59170	OsAPRL5 adenosine 5'-phosphosulfate reductase-like OsAPRL5, expressed
OS03G0815800	Os03g0815800	LOC_Os03g60120	AP2 domain containing protein, expressed
OS03G0817100	Os03g0817100	LOC_Os03g60250	membrane associated DUF588 domain containing protein, putative, expressed
OS03G0817800	Os03g0817800	LOC_Os03g60340	leaf senescence related protein, putative, expressed
OS03G0818000	Os03g0818000	LOC_Os03g60360	protein kinase PKN/PRK1, effector, putative, expressed
OS03G0821250	Os03g0821250	LOC_Os03g60639	expressed protein
OS03G0823700	Os03g0823700	LOC_Os03g60870	ras-related protein, putative, expressed
OS03G0826600	Os03g0826600	LOC_Os03g61130	phosphoesterase family protein, putative, expressed
OS03G0828500	Os03g0828500	LOC_Os03g61280	OsMan05 - Endo-Beta-Mannanase, expressed
OS03G0828600	Os03g0828600	LOC_Os03g61290	ATCHX, putative, expressed
OS03G0828800	Os03g0828800	LOC_Os03g61310	receptor-like protein kinase, putative, expressed
OS03G0829100	Os03g0829100	LOC_Os03g61340	hydrolase, alpha/beta fold family domain containing protein, expressed
OS03G0830400	Os03g0830400	LOC_Os03g61490	expressed protein
OS03G0839300	Os03g0839300	LOC_Os03g62280	expressed protein
OS03G0839900	Os03g0839900	LOC_Os03g62340	protein kinase family protein, putative, expressed
OS03G0840200	Os03g0840200	LOC_Os03g62370	WD40-like Beta Propeller Repeat family protein, expressed
OS03G0840500	Os03g0840500	LOC_Os03g62388	expressed protein
OS03G0841100	Os03g0841100	LOC_Os03g62430	OsWAK28 - OsWAK receptor-like protein kinase, expressed
OS03G0848700	Os03g0848700	LOC_Os03g63150	powdery mildew resistance protein PM3b, putative, expressed
OS03G0857200	Os03g0857200	LOC_Os03g64014	expressed protein
OS03G0861000	Os03g0861000	LOC_Os03g64310	expressed protein
OS03G0861800	Os03g0861800	LOC_Os03g64360	OsFBX113 - F-box domain containing protein, expressed
OS03G0862000	Os03g0862000	LOC_Os03g64380	expressed protein
OS04G0103300	Os04g0103300	LOC_Os04g01300	OsRhmbd10 - Putative Rhomboid homologue, expressed
OS04G0103900	Os04g0103900	LOC_Os04g01354	chalcone synthase, putative, expressed
OS04G0104350	OS04G0104350	NULL	NULL
OS04G0105900	Os04g0105900	LOC_Os04g01560	expressed protein
OS04G0107900	Os04g0107900	LOC_Os04g01740	heat shock protein, putative, expressed
OS04G0111100	Os04g0111100	LOC_Os04g02030	rp1, putative, expressed
OS04G0115500	Os04g0115500	LOC_Os04g02510	ZOS4-01 - C2H2 zinc finger protein, expressed
OS04G0115650	Os04g0115650	LOC_Os04g02520	Leucine Rich Repeat family protein, expressed
OS04G0115700	Os04g0115700	LOC_Os04g02530	expressed protein
OS04G0115800	Os04g0115800	LOC_Os04g02550	expressed protein
OS04G0117300	Os04g0117300	LOC_Os04g02690	pattern formation protein EMB30, putative, expressed
OS04G0117500	Os04g0117500	LOC_Os04g02720	potassium channel KAT2, putative, expressed
OS04G0118700	Os04g0118700	LOC_Os04g02850	pentatricopeptide, putative, expressed
OS04G0119400	Os04g0119400	LOC_Os04g02900	dehydrogenase E1 component domain containing protein, expressed
OS04G0120300	Os04g0120300	LOC_Os04g02980	OsSub33 - Putative Subtilisin homologue, expressed
OS04G0121100	Os04g0121100	LOC_Os04g03050	OsSub34 - Putative Subtilisin homologue, expressed
OS04G0121300	Os04g0121300	LOC_Os04g03100	OsSub35 - Putative Subtilisin homologue, expressed
OS04G0122000	Os04g0122000	LOC_Os04g03180	disease resistance protein, putative, expressed
OS04G0127200	Os04g0127200,Os04g0127100	LOC_Os04g03796	OsSub37 - Putative Subtilisin homologue, expressed
OS04G0127300	Os04g0127300	LOC_Os04g03810	OsSub38 - Putative Subtilisin homologue, expressed
OS04G0130433	Os04g0130433	LOC_Os04g04070	expressed protein
OS04G0132900	Os04g0132900,Os04g0132950	LOC_Os04g04390	retrotransposon protein, putative, unclassified, expressed
OS04G0137550	OS04G0137550	NULL	NULL
OS04G0139201	OS04G0139201	NULL	NULL
OS04G0142850	OS04G0142850	NULL	NULL
OS04G0154800	Os04g0154800	LOC_Os04g07110	expressed protein
OS04G0155500	Os04g0155500	LOC_Os04g07200	S-domain receptor-like protein kinase, putative, expressed
OS04G0162600	Os04g0162600	LOC_Os04g08070	expressed protein
OS04G0174900	Os04g0174900	LOC_Os04g09540	acyl-protein thioesterase, putative, expressed
OS04G0176400	Os04g0176400	LOC_Os04g09720	OsSCP22 - Putative Serine Carboxypeptidase homologue, expressed
OS04G0178400	Os04g0178400	LOC_Os04g09920	cytochrome P450, putative, expressed
OS04G0182300	Os04g0182300	LOC_Os04g10360	OsSub40 - Putative Subtilisin homologue, expressed
OS04G0182800	Os04g0182800	LOC_Os04g10400	electron transfer flavoprotein subunit beta, putative, expressed
OS04G0186450	OS04G0186450	NULL	NULL
OS04G0187001	OS04G0187001	NULL	NULL
OS04G0189800	Os04g0189800	LOC_Os04g11165	gamma-thionin family domain containing protein, expressed
OS04G0193200	Os04g0193200	LOC_Os04g11640	methyl-CpG binding domain containing protein, expressed
OS04G0204100	Os04g0204100	LOC_Os04g12720	indole-3-acetate beta-glucosyltransferase, putative, expressed
OS04G0204150	OS04G0204150	NULL	NULL
OS04G0204200	Os04g0204200	LOC_Os04g12730	expressed protein
OS04G0206700	Os04g0206700	LOC_Os04g12980	UDP-glucoronosyl/UDP-glucosyl transferase, putative, expressed
OS04G0206850	OS04G0206850	NULL	NULL
OS04G0212700	Os04g0212700	LOC_Os04g13530	Core histone H2A/H2B/H3/H4 domain containing protein, putative, expressed
OS04G0221000	Os04g0221000	LOC_Os04g14410	expressed protein
OS04G0221300	Os04g0221300	LOC_Os04g14450	pentatricopeptide, putative, expressed
OS04G0221450	OS04G0221450	NULL	NULL
OS04G0221600	Os04g0221600	LOC_Os04g14510	expressed protein
OS04G0221800	Os04g0221800	LOC_Os04g14540	expressed protein
OS04G0223901	Os04g0223901	LOC_Os04g14710	flavin-containing monooxygenase family protein, putative, expressed
OS04G0225067	OS04G0225067	NULL	NULL
OS04G0225100	Os04g0225100	LOC_Os04g14810	3-5 exonuclease domain-containing protein, putative, expressed
OS04G0226800	Os04g0226800	LOC_Os04g15630	xa21, putative, expressed
OS04G0227100	Os04g0227100	LOC_Os04g15680	expressed protein
OS04G0227200	Os04g0227200	LOC_Os04g15660	receptor kinase, putative, expressed
OS04G0250050	OS04G0250050	NULL	NULL
OS04G0258900	Os04g0258900	LOC_Os04g18790	OsFBX126 - F-box domain containing protein, expressed
OS04G0271200	Os04g0271200	LOC_Os04g20280	expressed protein
OS04G0275100	Os04g0275100	LOC_Os04g20680	wall-associated receptor kinase 3 precursor, putative, expressed
OS04G0278000	Os04g0278000	LOC_Os04g20920	H-BTB2 - Bric-a-Brac, Tramtrack, Broad Complex BTB domain with H family conserved sequence, expressed
OS04G0278900	Os04g0278900	LOC_Os04g20990	tRNA-dihydrouridine synthase, putative, expressed
OS04G0280700	OS04G0280700	NULL	NULL
OS04G0284900	Os04g0284900	LOC_Os04g21710	expressed protein
OS04G0289800	Os04g0289800	LOC_Os04g22240	zinc finger, C3HC4 type domain containing protein, expressed
OS04G0291100	Os04g0291100	LOC_Os04g22390	short chain dehydrogenase/reductase protein, putative, expressed
OS04G0293700	Os04g0293700	LOC_Os04g22720	expressed protein
OS04G0295100	Os04g0295100,Os04g0295300	LOC_Os04g22870	rpp14 family protein, expressed
OS04G0296700	Os04g0296700	LOC_Os04g23040	expressed protein
OS04G0303100	Os04g0303100	LOC_Os04g23700	lectin protein kinase family protein, putative, expressed
OS04G0307300	Os04g0307300	LOC_Os04g24190	growth-regulating factor 11, putative, expressed
OS04G0307500	Os04g0307500	LOC_Os04g24220	OsWAK32 - OsWAK receptor-like protein kinase, expressed
OS04G0307900	Os04g0307900	LOC_Os04g24290	wall-associated receptor kinase 3 precursor, putative, expressed
OS04G0309400	Os04g0309400	LOC_Os04g24414	expressed protein
OS04G0325300	Os04g0325300	LOC_Os04g25900	go35 NBS-LRR, putative, expressed
OS04G0337201	Os04g0337201	LOC_Os04g26841	importin-8, putative, expressed
OS04G0356600	Os04g0356600	LOC_Os04g28780	serine/threonine-protein kinase receptor precursor, putative, expressed
OS04G0367201	Os04g0367201	LOC_Os04g29880	OsWAK41 - OsWAK receptor-like protein OsWAK-RLP, expressed
OS04G0368000	Os04g0368000	LOC_Os04g29960	OsWAK43 - OsWAK receptor-like protein kinase, expressed
OS04G0368300	Os04g0368300	LOC_Os04g29990	OsWAK44 - OsWAK receptor-like protein kinase, expressed
OS04G0368800	Os04g0368800	LOC_Os04g30010	OsWAK45 - OsWAK receptor-like protein kinase, expressed
OS04G0370500	Os04g0370500	LOC_Os04g30200	OsFBL14 - F-box domain and LRR containing protein, expressed
OS04G0370600	Os04g0370600	LOC_Os04g30210	OsFBL15 - F-box domain and LRR containing protein, expressed
OS04G0371100	Os04g0371100	LOC_Os04g30260	OsWAK47 - OsWAK receptor-like protein kinase, expressed
OS04G0378575	Os04g0378575	LOC_Os04g30930	NB-ARC domain containing protein, expressed
OS04G0387300	Os04g0387300	LOC_Os04g31790	expressed protein
OS04G0389100	Os04g0389100	LOC_Os04g31960	thiamine pyrophosphate enzyme, C-terminal TPP binding domain containing protein, expressed
OS04G0394250	OS04G0394250	NULL	NULL
OS04G0397901	Os04g0397901	LOC_Os04g32610	expressed protein
OS04G0401400	Os04g0401400	LOC_Os04g32890	retrotransposon protein, putative, unclassified, expressed
OS04G0401900	Os04g0401900	LOC_Os04g32940	Leucine Rich Repeat family protein, expressed
OS04G0413000	Os04g0413000	LOC_Os04g33700	ABC transmembrane transporter domain containing protein, expressed
OS04G0420900	Os04g0420900	LOC_Os04g34370	serine/threonine-protein kinase receptor precursor, putative, expressed
OS04G0431700	Os04g0431700	LOC_Os04g35210	Leucine Rich Repeat family protein, expressed
OS04G0433900	Os04g0433900	LOC_Os04g35430	PHD-finger domain containing protein, expressed
OS04G0439200	Os04g0439200	LOC_Os04g35860	T-complex protein 11, putative, expressed
OS04G0442200	Os04g0442200	LOC_Os04g36062	expressed protein
OS04G0443000	Os04g0443000	LOC_Os04g36590	transposon protein, putative, unclassified, expressed
OS04G0443400	OS04G0443400	NULL	NULL
OS04G0444200	Os04g0444200	LOC_Os04g36660	calmodulin binding protein, putative, expressed
OS04G0457800	Os04g0457800	LOC_Os04g38480	BRASSINOSTEROID INSENSITIVE 1-associated receptor kinase 1 precursor, putative, expressed
OS04G0458000	OS04G0458000	NULL	NULL
OS04G0458400	OS04G0458400	NULL	NULL
OS04G0463900	Os04g0463900	LOC_Os04g38990	expressed protein
OS04G0471400	Os04g0471400	LOC_Os04g39560	expressed protein
OS04G0471700	Os04g0471700	LOC_Os04g39570	WRKY35, expressed
OS04G0472333	OS04G0472333	NULL	NULL
OS04G0475000	OS04G0475000	NULL	NULL
OS04G0475100	Os04g0475100	LOC_Os04g39910	receptor-like protein kinase, putative, expressed
OS04G0476700	Os04g0476700	LOC_Os04g40080	leucine rich repeat containing protein, expressed
OS04G0476800	Os04g0476800	LOC_Os04g40090	zinc finger, ZZ type family protein, expressed
OS04G0477900	Os04g0477900	LOC_Os04g40180	expressed protein
OS04G0479500	Os04g0479500	LOC_Os04g40330	OsFBX141 - F-box domain containing protein, expressed
OS04G0481400	Os04g0481400	LOC_Os04g40540	protein-L-isoaspartate O-methyltransferase, putative, expressed
OS04G0483200	Os04g0483200	LOC_Os04g40700	steroid nuclear receptor, ligand-binding, putative, expressed
OS04G0488100	Os04g0488100	LOC_Os04g41110	Rad21 / Rec8 like protein, putative, expressed
OS04G0498650	OS04G0498650	NULL	NULL
OS04G0499300	Os04g0499300	LOC_Os04g42140	eukaryotic initiation factor iso-4F subunit p82-34, putative, expressed
OS04G0509800	OS04G0509800	NULL	NULL
OS04G0510600	Os04g0510600	LOC_Os04g43160	expressed protein
OS04G0511700	Os04g0511700	LOC_Os04g43230	expressed protein
OS04G0518800	Os04g0518800	LOC_Os04g43840	possible lysine decarboxylase domain containing protein, expressed
OS04G0524900	Os04g0524900	LOC_Os04g44330	transposon protein, putative, unclassified, expressed
OS04G0543700	Os04g0543700	LOC_Os04g45960	OsSub42 - Putative Subtilisin homologue, expressed
OS04G0544400	Os04g0544400	LOC_Os04g46010	PPR repeat domain containing protein, putative, expressed
OS04G0547800	Os04g0547800	LOC_Os04g46270	expressed protein
OS04G0554000	Os04g0554000	LOC_Os04g46760	trehalose phosphatase, putative, expressed
OS04G0559200	Os04g0559200	LOC_Os04g47180	expressed protein
OS04G0564700	Os04g0564700	LOC_Os04g47700	expressed protein
OS04G0568400	Os04g0568400,Os04g0568300	LOC_Os04g48010	WD-40 repeat family protein, putative, expressed
OS04G0572100	OS04G0572100	NULL	NULL
OS04G0576700	Os04g0576700	LOC_Os04g48730	expressed protein
OS04G0582000	Os04g0582000	LOC_Os04g49270	tRNA-splicing endonuclease positive effector-related, putative, expressed
OS04G0583900	Os04g0583900	LOC_Os04g49450	MYB family transcription factor, putative, expressed
OS04G0593700	Os04g0593700	LOC_Os04g50730	RWD domain containing protein, expressed
OS04G0597501	Os04g0597400,Os04g0597501	LOC_Os04g50930	peptide transporter PTR2, putative, expressed
OS04G0597534	OS04G0597534	NULL	NULL
OS04G0598600	OS04G0598600	NULL	NULL
OS04G0598800	Os04g0598800	LOC_Os04g51030	wall-associated kinase 1, putative, expressed
OS04G0598900	Os04g0598900	LOC_Os04g51040	OsWAK50 - OsWAK receptor-like protein kinase, expressed
OS04G0602000	Os04g0601900,Os04g0602000	LOC_Os04g51290	expressed protein
OS04G0610200	Os04g0610200	LOC_Os04g52074	expressed protein
OS04G0611700	Os04g0611700	LOC_Os04g52210	terpene synthase, putative, expressed
OS04G0615550	OS04G0615550	NULL	NULL
OS04G0616300	Os04g0616300	LOC_Os04g52600	SHR5-receptor-like kinase, putative, expressed
OS04G0616500	Os04g0616500	LOC_Os04g52614	SHR5-receptor-like kinase, putative, expressed
OS04G0616900	Os04g0616900	LOC_Os04g52660	expressed protein
OS04G0617500	OS04G0617500	NULL	NULL
OS04G0618050	Os04g0618050	LOC_Os04g52725	PPR repeat domain containing protein, putative, expressed
OS04G0619200	Os04g0619200	LOC_Os04g52820	expressed protein
OS04G0620400	Os04g0620400,Os04g0620500	LOC_Os04g52940	SIT4 phosphatase-associated protein domain containing protein, expressed
OS04G0620950	Os04g0620800,Os04g0620950	LOC_Os04g52970	NBS-LRR disease resistance protein, putative, expressed
OS04G0621650	OS04G0621650	NULL	NULL
OS04G0623066	Os04g0623066	LOC_Os04g53160	NBS-LRR disease resistance protein, putative, expressed
OS04G0623100	Os04g0623100	LOC_Os04g53170	bromodomain containing protein, expressed
OS04G0624600	Os04g0624600	LOC_Os04g53310	soluble starch synthase 3, chloroplast precursor, putative, expressed
OS04G0625850	OS04G0625850	NULL	NULL
OS04G0626000	Os04g0626000	LOC_Os04g53460	AT hook motif family protein, expressed
OS04G0626450	Os04g0626450,Os04g0626500	LOC_Os04g53496	NBS-LRR disease resistance protein, putative, expressed
OS04G0626500	Os04g0626450,Os04g0626500	LOC_Os04g53496	NBS-LRR disease resistance protein, putative, expressed
OS04G0626700	Os04g0626700	LOC_Os04g53520	expressed protein
OS04G0630400	Os04g0630400	LOC_Os04g53810	leucoanthocyanidin reductase, putative, expressed
OS04G0636000	Os04g0636000	LOC_Os04g54350	SPRY-domain containing protein, putative, expressed
OS04G0636700	Os04g0636700	LOC_Os04g54420	protein of unknown function, DUF618 domain containing protein, expressed
OS04G0643100	Os04g0643100	LOC_Os04g55040	vacuolar ATP synthase subunit D 1, putative, expressed
OS04G0644000	Os04g0644000	LOC_Os04g55110	expressed protein
OS04G0644700	Os04g0644700	LOC_Os04g55200	coatomer subunit epsilon, putative, expressed
OS04G0645100	Os04g0645100	LOC_Os04g55230	tetratricopeptide repeat domain containing protein, putative, expressed
OS04G0650500	Os04g0650500	LOC_Os04g55690	CCB4, putative, expressed
OS04G0651350	OS04G0651350	NULL	NULL
OS04G0664600	Os04g0664600	LOC_Os04g56910	transferase family protein, putative, expressed
OS04G0669450	OS04G0669450	NULL	NULL
OS04G0669475	Os04g0669475	LOC_Os04g57360	expressed protein
OS04G0672100	Os04g0672100	LOC_Os04g57630	phytosulfokine receptor precursor, putative, expressed
OS04G0674200	Os04g0674200	LOC_Os04g57790	ubiquinone biosynthesis protein COQ4, putative, expressed
OS04G0675000	Os04g0675000	LOC_Os04g57870	expressed protein
OS04G0675101	OS04G0675101	NULL	NULL
OS04G0675800	Os04g0675800,Os04g0676000	LOC_Os04g57920	OsFBX154 - F-box domain containing protein, expressed
OS04G0677300	Os04g0677300	LOC_Os04g58090	harpin-induced protein 1 domain containing protein, expressed
OS04G0682500	Os04g0682500	LOC_Os04g58600	L-asparaginase precursor protein, putative, expressed
OS04G0683500	Os04g0683500	LOC_Os04g58690	tRNA-specific adenosine deaminase 1, putative, expressed
OS04G0685400	Os04g0685400	LOC_Os04g58860	harpin-induced protein 1 domain containing protein, expressed
OS04G0689800	Os04g0689800	LOC_Os04g59360	csAtPR5, putative, expressed
OS04G0692300	Os04g0692300	LOC_Os04g59580	zinc finger, C3HC4 type domain containing protein, expressed
OS04G0693400	OS04G0693400	NULL	NULL
OS05G0100008	Os05g0100008	LOC_Os05g00992	expressed protein
OS05G0102200	Os05g0102200	LOC_Os05g01180	zinc knuckle family protein, expressed
OS05G0102300	Os05g0102300	LOC_Os05g01190	transposon protein, putative, unclassified, expressed
OS05G0103600	Os05g0103600	LOC_Os05g01310	ankyrin repeat family protein, putative, expressed
OS05G0104900	Os05g0104900	LOC_Os05g01460	STIP1 homology and U box-containing protein 1, putative, expressed
OS05G0114950	Os05g0114950	LOC_Os05g02435	expressed protein
OS05G0116000	Os05g0116000	LOC_Os05g02520	cupin domain containing protein, expressed
OS05G0117798	Os05g0117798	LOC_Os05g02670	kinesin motor domain containing protein, putative, expressed
OS05G0120900	Os05g0120900	LOC_Os05g02980	expressed protein
OS05G0123200	Os05g0123200	LOC_Os05g03190	IQ calmodulin-binding motif domain containing protein, expressed
OS05G0129800	Os05g0129800	LOC_Os05g03900	WRKY109, expressed
OS05G0130400	Os05g0130400	LOC_Os05g03972	plant protein of unknown function domain containing protein, expressed
OS05G0134700	Os05g0134700	LOC_Os05g04410	peroxidase precursor, putative, expressed
OS05G0134800	Os05g0134800	LOC_Os05g04440	peroxidase precursor, putative, expressed
OS05G0138300	Os05g0138300	LOC_Os05g04700	OsRCI2-6 - Hydrophobic protein LTI6B, expressed
OS05G0140800	Os05g0140800	LOC_Os05g04870	oxidoreductase, short chain dehydrogenase/reductase family protein, putative, expressed
OS05G0143000	Os05g0143000	LOC_Os05g05110	expressed protein
OS05G0146100	Os05g0146100	LOC_Os05g05354	expressed protein
OS05G0153200	Os05g0153200	LOC_Os05g06130	transcription factor X1, putative, expressed
OS05G0153500	Os05g0153500	LOC_Os05g06160	trehalose phosphatase, putative, expressed
OS05G0156800	Os05g0156800	LOC_Os05g06470	suppressor of Mek, putative, expressed
OS05G0157000	OS05G0157000	NULL	NULL
OS05G0159501	OS05G0159501	NULL	NULL
OS05G0160600	Os05g0160600	LOC_Os05g06814	expressed protein
OS05G0168500	Os05g0168500	LOC_Os05g07650	transmembrane 9 superfamily member, putative, expressed
OS05G0172100	Os05g0172100	LOC_Os05g07960	F-box protein interaction domain containing protein, expressed
OS05G0172500	Os05g0172500	LOC_Os05g08010	OsFBX161 - F-box domain containing protein, expressed
OS05G0173500	Os05g0173500	LOC_Os05g08090	expressed protein
OS05G0173700	Os05g0173700	LOC_Os05g08100	DNA replication licensing factor MCM3 homolog 3, putative, expressed
OS05G0188600	Os05g0188600	LOC_Os05g09630	homeobox domain containing protein, expressed
OS05G0189425	OS05G0189425	NULL	NULL
OS05G0189900	Os05g0189900	LOC_Os05g09724	HAD superfamily phosphatase, putative, expressed
OS05G0190000	Os05g0190000	LOC_Os05g09728	expressed protein
OS05G0193700	Os05g0193700	LOC_Os05g10560	expressed protein
OS05G0197900	Os05g0197900	LOC_Os05g10900	plant protein of unknown function domain containing protein, expressed
OS05G0198100	Os05g0198100	LOC_Os05g10920	plant protein of unknown function domain containing protein, expressed
OS05G0203500	Os05g0203500	LOC_Os05g11370	expressed protein
OS05G0206800	OS05G0206800	NULL	NULL
OS05G0207900	Os05g0207900	LOC_Os05g11770	ulp1 protease family protein, putative, expressed
OS05G0212100	Os05g0212100	LOC_Os05g12130	EMB2261, putative, expressed
OS05G0212200	Os05g0212200	LOC_Os05g12140	Leucine Rich Repeat family protein, expressed
OS05G0212300	Os05g0212300	LOC_Os05g12150	endoglucanase precursor, putative, expressed
OS05G0227100	Os05g0227100	LOC_Os05g13904	expressed protein
OS05G0232500	Os05g0232500	LOC_Os05g14300	ubiquitin-conjugating enzyme E2 O, putative, expressed
OS05G0236600	OS05G0236600	NULL	NULL
OS05G0250700	Os05g0250700	LOC_Os05g16200	blight resistance protein T118, putative, expressed
OS05G0250866	OS05G0250866	NULL	NULL
OS05G0253700	Os05g0253700	LOC_Os05g16460	expressed protein
OS05G0269000	Os05g0269000	LOC_Os05g18650	expressed protein
OS05G0279750	OS05G0279750	NULL	NULL
OS05G0281400	Os05g0281400	LOC_Os05g20304	expressed protein
OS05G0296200	Os05g0296200	LOC_Os05g23050	expressed protein
OS05G0305100	Os05g0305100	LOC_Os05g23940	transcription initiation factor IIB, putative, expressed
OS05G0307400	Os05g0307400	LOC_Os05g24160	double-stranded RNA binding motif containing protein, expressed
OS05G0317200	Os05g0317200	LOC_Os05g25310	acyl-CoA synthetase protein, putative, expressed
OS05G0317700	Os05g0317700	LOC_Os05g25350	TKL_IRAK_CrRLK1L-1.12 - The CrRLK1L-1 subfamily has homology to the CrRLK1L homolog, expressed
OS05G0317900	Os05g0317900	LOC_Os05g25370	TKL_IRAK_CrRLK1L-1.2 - The CrRLK1L-1 subfamily has homology to the CrRLK1L homolog, expressed
OS05G0324200	Os05g0324200	LOC_Os05g25880	N-dimethylguanosine tRNA methyltransferase, putative, expressed
OS05G0331532	Os05g0331532	LOC_Os05g26720	PROLM16 - Prolamin precursor, expressed
OS05G0334750	Os05g0334750	LOC_Os05g26940	CAMK_KIN1/SNF1/Nim1_like.23 - CAMK includes calcium/calmodulin depedent protein kinases, expressed
OS05G0341600	Os05g0341600	LOC_Os05g27530	ras-related protein, putative, expressed
OS05G0350150	Os05g0350150	LOC_Os05g28270	transposon protein, putative, unclassified, expressed
OS05G0356201	Os05g0356201	LOC_Os05g28800	LIPLESS1, putative, expressed
OS05G0359833	Os05g0359833	LOC_Os05g29676	RING-H2 finger protein, putative, expressed
OS05G0359966	OS05G0359966	NULL	NULL
OS05G0365300	Os05g0365300	LOC_Os05g30220	disease resistance RPP13-like protein 1, putative, expressed
OS05G0365600	Os05g0365600	LOC_Os05g30250	Os5bglu19 - beta-glucosidase homologue, similar to G. max isohydroxyurate hydrolase, expressed
OS05G0368350	OS05G0368350	NULL	NULL
OS05G0369300	Os05g0369300	LOC_Os05g30640	leucine zipper protein-like, putative, expressed
OS05G0369900	Os05g0369900	LOC_Os05g30700	expressed protein
OS05G0370000	Os05g0370000	LOC_Os05g30710	pentatricopeptide, putative, expressed
OS05G0370300	Os05g0370300	LOC_Os05g30740	C2 domain containing protein, putative, expressed
OS05G0373900	Os05g0373900	LOC_Os05g31020	eukaryotic peptide chain release factor subunit 1-1, putative, expressed
OS05G0380400	OS05G0380400	NULL	NULL
OS05G0380850	OS05G0380850	NULL	NULL
OS05G0386800	Os05g0386800	LOC_Os05g32110	COBRA, putative, expressed
OS05G0387700	Os05g0387700	LOC_Os05g32170	TKL_IRAK_CR4L.5 - The CR4L subfamily has homology with Crinkly4, expressed
OS05G0388025	OS05G0388025	NULL	NULL
OS05G0391500	Os05g0391500	LOC_Os05g32530	mannosylglycoprotein endo-beta-mannosidase, putative, expressed
OS05G0397650	Os05g0397650	LOC_Os05g33000	E3 ubiquitin-protein ligase MGRN1, putative, expressed
OS05G0399100	Os05g0399100	LOC_Os05g33100	endo-1,3;1,4-beta-D-glucanase precursor, putative, expressed
OS05G0399800	Os05g0399800	LOC_Os05g33160	inactive receptor kinase At1g27190 precursor, putative, expressed
OS05G0403300	Os05g0403300	LOC_Os05g33430	xyloglucanase inhibitor, putative, expressed
OS05G0403600	Os05g0403600	LOC_Os05g33460	mTERF domain containing protein, expressed
OS05G0406550	Os05g0406550	LOC_Os05g33670	expressed protein
OS05G0408200	Os05g0408200	LOC_Os05g33810	OsSPL9 - SBP-box gene family member, expressed
OS05G0409400	Os05g0409400	LOC_Os05g33890	microtubule associated protein, putative, expressed
OS05G0414300	Os05g0414300	LOC_Os05g34230	disease resistance protein RGA3, putative, expressed
OS05G0417700	Os05g0417700	LOC_Os05g34510	expressed protein
OS05G0428100	Os05g0428100	LOC_Os05g35360	beta-galactosidase 7 precursor, putative, expressed
OS05G0441750	Os05g0441750	LOC_Os05g37000	expressed protein
OS05G0442700	Os05g0442700	LOC_Os05g37080	No apical meristem protein, putative, expressed
OS05G0445100	Os05g0445100	LOC_Os05g37250	cytochrome P450, putative, expressed
OS05G0446000	Os05g0445900,Os05g0446000	LOC_Os05g37350	hhH-GPD superfamily base excision DNA repair protein, expressed
OS05G0447700	Os05g0447700	LOC_Os05g37520	expressed protein
OS05G0460600	Os05g0460600	LOC_Os05g38570	riboflavin biosynthesis protein ribAB, chloroplast precursor, putative, expressed
OS05G0463400	Os05g0463400	LOC_Os05g38800	PWWP domain containing protein, expressed
OS05G0463600	Os05g0463500,Os05g0463600	LOC_Os05g38810	PWWP domain containing protein, expressed
OS05G0466900	Os05g0466900	LOC_Os05g39080	protein kinase family protein, putative, expressed
OS05G0467700	Os05g0467700	LOC_Os05g39150	expressed protein
OS05G0467900	Os05g0467900	LOC_Os05g39170	expressed protein
OS05G0468100	Os05g0468100	LOC_Os05g39180	expressed protein
OS05G0475300	Os05g0475300,Os05g0475475	LOC_Os05g39760	VHS and GAT domain containing protein, expressed
OS05G0476350	Os05g0476316,Os05g0476350	LOC_Os05g39870	CAMK_KIN1/SNF1/Nim1_like.24 - CAMK includes calcium/calmodulin depedent protein kinases, expressed
OS05G0476700	Os05g0476700	LOC_Os05g39930	spotted leaf 11, putative, expressed
OS05G0478400	Os05g0478400	LOC_Os05g40060	WRKY48, expressed
OS05G0479800	Os05g0479800	LOC_Os05g40160	NB-ARC domain containing protein, expressed
OS05G0482400	Os05g0482400	LOC_Os05g40384	cytochrome P450, putative, expressed
OS05G0485800	Os05g0485800	LOC_Os05g40740	monocopper oxidase, putative, expressed
OS05G0486100	Os05g0486100	LOC_Os05g40770	leucine-rich repeat family protein, putative, expressed
OS05G0489500	Os05g0489500	LOC_Os05g41050	expressed protein
OS05G0489700	Os05g0489700	LOC_Os05g41070	bZIP transcription factor, putative, expressed
OS05G0492000	Os05g0492000	LOC_Os05g41280	transcription factor HBP-1b, putative, expressed
OS05G0492600	Os05g0492600	LOC_Os05g41310	disease resistance protein RGA2, putative, expressed
OS05G0499600	Os05g0499600	LOC_Os05g42020	UDP-glucoronosyl and UDP-glucosyl transferase domain containing protein, expressed
OS05G0499800	Os05g0499800	LOC_Os05g42040	UDP-glucoronosyl and UDP-glucosyl transferase domain containing protein, expressed
OS05G0500000	Os05g0500000	LOC_Os05g42060	UDP-glucoronosyl/UDP-glucosyl transferase, putative, expressed
OS05G0501350	Os05g0501350	LOC_Os05g42200	cyclin-B1-1, putative, expressed
OS05G0504800	Os05g0504800	LOC_Os05g42400	hypothetical protein
OS05G0506500	Os05g0506500	LOC_Os05g43090	GDSL-like lipase/acylhydrolase, putative, expressed
OS05G0506800	Os05g0506800	LOC_Os05g43120	GDSL-like lipase/acylhydrolase, putative, expressed
OS05G0512600	Os05g0512600	LOC_Os05g43690	glucan endo-1,3-beta-glucosidase-like protein 3 precursor, putative, expressed
OS05G0514600	Os05g0514600	LOC_Os05g43880	gibberellin 2-beta-dioxygenase, putative, expressed
OS05G0515600	Os05g0515600	LOC_Os05g43940	O-methyltransferase, putative, expressed
OS05G0517800	Os05g0517800	LOC_Os05g44160	expressed protein
OS05G0519500	Os05g0519500	LOC_Os05g44320	WD domain, G-beta repeat domain containing protein, expressed
OS05G0520100	Os05g0520100	LOC_Os05g44380	MPPN domain containing protein, expressed
OS05G0520200	Os05g0520200	LOC_Os05g44390	peptidyl-tRNA hydrolase, putative, expressed
OS05G0526300	Os05g0526300	LOC_Os05g45040	OsFBX170 - F-box domain containing protein, expressed
OS05G0527100	Os05g0527100	LOC_Os05g45110	anthocyanidin 5,3-O-glucosyltransferase, putative, expressed
OS05G0528050	OS05G0528050	NULL	NULL
OS05G0528900	Os05g0528900	LOC_Os05g45270	ribosomal L9, putative, expressed
OS05G0532500	Os05g0532500	LOC_Os05g45580	expressed protein
OS05G0532800	Os05g0532800	LOC_Os05g45610	expressed protein
OS05G0538250	Os05g0538250	LOC_Os05g46090	Leucine Rich Repeat domain containing protein, expressed
OS05G0547850	Os05g0547850	LOC_Os05g47446	expressed protein
OS05G0548300	Os05g0548300	LOC_Os05g47490	MDR-like ABC transporter, putative, expressed
OS05G0548600	Os05g0548600	LOC_Os05g47510	pentatricopeptide, putative, expressed
OS05G0554800	Os05g0554800	LOC_Os05g48120	expressed protein
OS05G0555100	Os05g0555100	LOC_Os05g48150	transposon protein, putative, unclassified, expressed
OS05G0560300	Os05g0560300	LOC_Os05g48660	MRH1, putative, expressed
OS05G0561600	Os05g0561600	LOC_Os05g48760	protein of unknown function DUF1421 domain containing protein, expressed
OS05G0561800	Os05g0561800	LOC_Os05g48770	expressed protein
OS05G0564601	OS05G0564601	NULL	NULL
OS05G0568900	Os05g0568900	LOC_Os05g49380	OsDegp9 - Putative Deg protease homologue, expressed
OS05G0569000	Os05g0569000	LOC_Os05g49390	expressed protein
OS05G0569450	OS05G0569450	NULL	NULL
OS05G0570400	Os05g0570400	LOC_Os05g49520	CTP synthase, putative, expressed
OS05G0571200	Os05g0571200	LOC_Os05g49620	WRKY19, expressed
OS05G0574600	Os05g0574600	LOC_Os05g49900	3-ketoacyl-CoA synthase, putative, expressed
OS05G0580600	OS05G0580600	NULL	NULL
OS05G0582100	Os05g0582100	LOC_Os05g50510	CAS1 domain-containing protein 1 precursor, putative, expressed
OS05G0583100	Os05g0583100	LOC_Os05g50624	transposon protein, putative, unclassified, expressed
OS05G0584900	Os05g0584900	LOC_Os05g50770	C4-dicarboxylate transporter/malic acid transport protein, expressed
OS05G0593300	Os05g0593300	LOC_Os05g51550	DNA binding protein, putative, expressed
OS05G0593550	OS05G0593550	NULL	NULL
OS05G0596300	Os05g0596300	LOC_Os05g51760	transposon protein, putative, CACTA, En/Spm sub-class, expressed
OS05G0596600	Os05g0596600	LOC_Os05g51790	RecF/RecN/SMC N terminal domain containing protein, expressed
OS06G0101800	Os06g0101800	LOC_Os06g01230	no apical meristem protein, putative, expressed
OS06G0102700	Os06g0102700,Os06g0102750	LOC_Os06g01304	spotted leaf 11, putative, expressed
OS06G0105400	Os06g0105400	LOC_Os06g01630	2-oxo acid dehydrogenases acyltransferase domain containing protein, expressed
OS06G0106500	Os06g0106500	LOC_Os06g01720	expressed protein
OS06G0108751	OS06G0108751	NULL	NULL
OS06G0109400	Os06g0109400	LOC_Os06g01980	AAA family ATPase, putative, expressed
OS06G0109801	OS06G0109801	NULL	NULL
OS06G0111800	Os06g0111800	LOC_Os06g02180	CSLD2 - cellulose synthase-like family D, expressed
OS06G0112000	Os06g0112000	LOC_Os06g02200	pentatricopeptide, putative, expressed
OS06G0116100	Os06g0116100	LOC_Os06g02550	CPuORF21 - conserved peptide uORF-containing transcript, expressed
OS06G0116933	Os06g0116933	LOC_Os06g02640	ripening-related protein precursor, putative, expressed
OS06G0117500	Os06g0117500	LOC_Os06g02680	expressed protein
OS06G0117800	Os06g0117800	LOC_Os06g02710	expressed protein
OS06G0118150	OS06G0118150	NULL	NULL
OS06G0119200	Os06g0119200	LOC_Os06g02840	expressed protein
OS06G0119300	Os06g0119300	LOC_Os06g02850	expressed protein
OS06G0121200	Os06g0121200	LOC_Os06g03050	expressed protein
OS06G0122001	OS06G0122001	NULL	NULL
OS06G0127100	Os06g0127100	LOC_Os06g03670	dehydration-responsive element-binding protein, putative, expressed
OS06G0128000	Os06g0128000	LOC_Os06g03740	folic acid binding protein, putative, expressed
OS06G0134800	Os06g0134800	LOC_Os06g04380	aminomethyltransferase, putative, expressed
OS06G0140300	Os06g0140300	LOC_Os06g04840	leucine rich repeat protein, putative, expressed
OS06G0142000	Os06g0142000,Os06g0142050	LOC_Os06g04970	expressed protein
OS06G0144850	OS06G0144850	NULL	NULL
OS06G0145600	Os06g0145600	LOC_Os06g05320	transferase family protein, putative, expressed
OS06G0146100	Os06g0146100	LOC_Os06g05359	NBS-LRR disease resistance protein, putative, expressed
OS06G0146250	Os06g0146250	LOC_Os06g05380	WRKY73, expressed
OS06G0151700	Os06g0151700	LOC_Os06g05830	protein kinase domain containing protein, expressed
OS06G0152700	Os06g0152700	LOC_Os06g05940	DTA2, putative, expressed
OS06G0152800	Os06g0152800	LOC_Os06g05950	expressed protein
OS06G0155900	Os06g0155900	LOC_Os06g06210	expressed protein
OS06G0156900	Os06g0156900	LOC_Os06g06280	galactosyltransferase family protein, putative, expressed
OS06G0159400	Os06g0159400	LOC_Os06g06450	heat shock protein STI, putative, expressed
OS06G0161300	Os06g0161300	LOC_Os06g06600	OsFBX187 - F-box domain containing protein, expressed
OS06G0161350	OS06G0161350	NULL	NULL
OS06G0161400	Os06g0161400	LOC_Os06g06610	expressed protein
OS06G0161800	Os06g0161800	LOC_Os06g06660	expressed protein
OS06G0161900	Os06g0161900	LOC_Os06g06670	expressed protein
OS06G0167500	Os06g0167500	LOC_Os06g07130	SHR5-receptor-like kinase, putative, expressed
OS06G0170100	Os06g0170100	LOC_Os06g07330	OsWAK63 - OsWAK receptor-like protein kinase, expressed
OS06G0183600	Os06g0183600	LOC_Os06g08460	exo70 exocyst complex subunit, putative, expressed
OS06G0185500	Os06g0185500	LOC_Os06g08640	transferase family protein, putative, expressed
OS06G0189600	Os06g0189600	LOC_Os06g08990	expressed protein
OS06G0191800	Os06g0191800	LOC_Os06g09220	cytochrome P450 72A1, putative, expressed
OS06G0194000	Os06g0194000	LOC_Os06g09390	AP2 domain containing protein, expressed
OS06G0218600	Os06g0218600	LOC_Os06g11490	plastocyanin-like domain containing protein, putative, expressed
OS06G0220100	OS06G0220100	NULL	NULL
OS06G0221100	Os06g0221100	LOC_Os06g11790	TLD family protein, putative, expressed
OS06G0224775	OS06G0224775	NULL	NULL
OS06G0226000	Os06g0226000	LOC_Os06g12170	expressed protein
OS06G0240050	Os06g0240050	LOC_Os06g13240	BURP domain containing protein, expressed
OS06G0243801	Os06g0243801	LOC_Os06g13530	benzoate carboxyl methyltransferase, putative, expressed
OS06G0244100	Os06g0244100	LOC_Os06g13570	expressed protein
OS06G0246200	Os06g0246200	LOC_Os06g13700	hypothetical protein
OS06G0247200	Os06g0247200	LOC_Os06g13780	expressed protein
OS06G0256000	Os06g0256000	LOC_Os06g14460	chromosome condensation protein like, putative, expressed
OS06G0259000	Os06g0259000	LOC_Os06g14750	phosphatidylinositol-4-phosphate 5-Kinase family protein, putative, expressed
OS06G0266266	Os06g0266266	LOC_Os06g15590	uncharacterized Cys-rich domain containing protein, putative
OS06G0268050	OS06G0268050	NULL	NULL
OS06G0268500	Os06g0268350,Os06g0268500	LOC_Os06g15750	NB-ARC domain containing protein, expressed
OS06G0269300	Os06g0269300	LOC_Os06g15820	NHL repeat-containing protein, putative, expressed
OS06G0273700	Os06g0273700	LOC_Os06g16250	expressed protein
OS06G0276300	Os06g0276300	LOC_Os06g16450	Leucine Rich Repeat family protein, expressed
OS06G0276750	OS06G0276750	NULL	NULL
OS06G0286700	Os06g0286700	LOC_Os06g17900	disease resistance protein RPM1, putative, expressed
OS06G0287000	Os06g0287000	LOC_Os06g17920	NBS-LRR disease resistance protein, putative, expressed
OS06G0288300	Os06g0288300	LOC_Os06g18010	UDP-glucoronosyl and UDP-glucosyl transferase domain containing protein, expressed
OS06G0303600	Os06g0303600	LOC_Os06g19970	expressed protein
OS06G0304700	Os06g0304700	LOC_Os06g20050	NBS type disease resistance protein, putative, expressed
OS06G0305200	Os06g0305200	LOC_Os06g20090	NUP155, putative, expressed
OS06G0305400	Os06g0305400	LOC_Os06g20110	expressed protein
OS06G0309550	OS06G0309550	NULL	NULL
OS06G0312950	OS06G0312950	NULL	NULL
OS06G0313000	OS06G0313000	NULL	NULL
OS06G0314300	Os06g0314300	LOC_Os06g20879	expressed protein
OS06G0315300	Os06g0315300	LOC_Os06g21020	methyltransferase, putative, expressed
OS06G0324400	Os06g0324400	LOC_Os06g21910	late embryogenesis abundant group 1, putative, expressed
OS06G0328400	Os06g0328400	LOC_Os06g22290	legume lectins beta domain containing protein, expressed
OS06G0329900	Os06g0329900	LOC_Os06g22440	SAM dependent carboxyl methyltransferase, putative, expressed
OS06G0331500	OS06G0331500	NULL	NULL
OS06G0333600	OS06G0333600	NULL	NULL
OS06G0335900	Os06g0335900,Os06g0335975,Os06g0335950	LOC_Os06g22919	DEFL9 - Defensin and Defensin-like DEFL family, expressed
OS06G0338700	Os06g0338700	LOC_Os06g23140	copper methylamine oxidase precursor, putative, expressed
OS06G0342000	Os06g0342000	LOC_Os06g23420	exostosin family domain containing protein, expressed
OS06G0346100	Os06g0346100	LOC_Os06g23770	expressed protein
OS06G0360300	Os06g0360300	LOC_Os06g25439	NAD dependent epimerase/dehydratase family protein, putative, expressed
OS06G0362100	Os06g0362100	LOC_Os06g25660	transposon protein, putative, unclassified, expressed
OS06G0367900	Os06g0367900	LOC_Os06g26340	CGMC_MAPKCMGC_2.10 - CGMC includes CDA, MAPK, GSK3, and CLKC kinases, expressed
OS06G0469800	OS06G0469800	NULL	NULL
OS06G0483500	Os06g0483500	LOC_Os06g28840	expressed protein
OS06G0484800	Os06g0484800	LOC_Os06g28980	retrotransposon protein, putative, unclassified, expressed
OS06G0484950	Os06g0484950	LOC_Os06g28990	transposon protein, putative, Mutator sub-class, expressed
OS06G0486900	Os06g0486900	LOC_Os06g29220	erythronate-4-phosphate dehydrogenase domain containing protein, expressed
OS06G0489900	Os06g0489900	LOC_Os06g29450	expressed protein
OS06G0496875	OS06G0496875	NULL	NULL
OS06G0497350	Os06g0497200,Os06g0497350	LOC_Os06g30179	cytochrome P450, putative, expressed
OS06G0506100	Os06g0506100	LOC_Os06g30940	pentatricopeptide, putative, expressed
OS06G0507200	Os06g0507200	LOC_Os06g31070	PROLM24 - Prolamin precursor, expressed
OS06G0508950	OS06G0508950	NULL	NULL
OS06G0515400	OS06G0515400	NULL	NULL
OS06G0516432	Os06g0516432	LOC_Os06g32480	expressed protein
OS06G0521000	Os06g0521000	LOC_Os06g32944	transposon protein, putative, Pong sub-class, expressed
OS06G0524900	Os06g0524900	LOC_Os06g33360	RGH1A, putative, expressed
OS06G0546500	Os06g0546500	LOC_Os06g35480	peroxidase precursor, putative, expressed
OS06G0551800	Os06g0551800	LOC_Os06g35850	lectin protein kinase family protein, putative, expressed
OS06G0552000	Os06g0552000	LOC_Os06g35870	lectin protein kinase family protein, putative, expressed
OS06G0556300	Os06g0556300	LOC_Os06g36220	OsFBX198 - F-box domain containing protein, expressed
OS06G0557400	Os06g0557400	LOC_Os06g36310	receptor-like protein kinase 5 precursor, putative, expressed
OS06G0573600	Os06g0573600	LOC_Os06g37560	beta-galactosidase precursor, putative, expressed
OS06G0576200	Os06g0576200	LOC_Os06g37800	conserved hypothetical protein
OS06G0576600	Os06g0576600	LOC_Os06g37830	transposon protein, putative, CACTA, En/Spm sub-class, expressed
OS06G0585950	Os06g0585950	LOC_Os06g38590	receptor-like protein kinase precursor, putative, expressed
OS06G0585982	Os06g0585982	LOC_Os06g38650	receptor-like protein kinase precursor, putative, expressed
OS06G0586150	Os06g0586150	LOC_Os06g38670	receptor-like protein kinase precursor, putative, expressed
OS06G0587000	Os06g0587000	LOC_Os06g38730	receptor-like protein kinase precursor, putative, expressed
OS06G0587200	Os06g0587200	LOC_Os06g38760	retrotransposon protein, putative, unclassified, expressed
OS06G0587900	Os06g0587900	LOC_Os06g38830	receptor-like protein kinase precursor, putative, expressed
OS06G0588800	Os06g0588800	LOC_Os06g38930	leucine-rich repeat receptor protein kinase EXS precursor, putative, expressed
OS06G0594100	Os06g0594100	LOC_Os06g39344	enoyl-CoA hydratase/isomerase family protein, putative, expressed
OS06G0602000	OS06G0602000	NULL	NULL
OS06G0606250	Os06g0606250	LOC_Os06g40420	expressed protein
OS06G0611600	Os06g0611600	LOC_Os06g40910	cytidine/deoxycytidylate deaminase, putative, expressed
OS06G0611700	Os06g0611700,Os06g0611750	LOC_Os06g40920	NAP domain containing protein, putative, expressed
OS06G0619000	Os06g0619000	LOC_Os06g41480	vrga1, putative, expressed
OS06G0620200	Os06g0620200	LOC_Os06g41560	receptor-like protein kinase, putative, expressed
OS06G0622700	Os06g0622700	LOC_Os06g41770	bZIP transcription factor domain containing protein, expressed
OS06G0622800	Os06g0622800,Os06g0623050	LOC_Os06g41780	guanine nucleotide exchange family protein, putative, expressed
OS06G0625800	Os06g0625800,Os06g0625900,Os06g0626050	LOC_Os06g42030	potassium transporter, putative, expressed
OS06G0627100	Os06g0627100	LOC_Os06g42164	expressed protein
OS06G0631800	Os06g0631800	LOC_Os06g42540	expressed protein
OS06G0635500	Os06g0635500	LOC_Os06g42890	DNA binding protein, putative, expressed
OS06G0636800	Os06g0636800	LOC_Os06g43060	expressed protein
OS06G0638000	Os06g0638000	LOC_Os06g43120	zinc finger C-x8-C-x5-C-x3-H type family protein, expressed
OS06G0641400	OS06G0641400	NULL	NULL
OS06G0641500	Os06g0641500	LOC_Os06g43410	cytochrome P450, putative, expressed
OS06G0644466	Os06g0644300,Os06g0644466	LOC_Os06g43670	Leucine Rich Repeat family protein, expressed
OS06G0647200	Os06g0647200	LOC_Os06g43910	two-component response regulator, putative, expressed
OS06G0650600	Os06g0650600	LOC_Os06g44140	transmembrane 9 superfamily member, putative, expressed
OS06G0654000	Os06g0654000	LOC_Os06g44380	ubiquitin carboxyl-terminal hydrolase family protein, expressed
OS06G0657500	Os06g0657500	LOC_Os06g44750	AP2 domain containing protein, expressed
OS06G0658900	Os06g0658900	LOC_Os06g44840	prenyltransferase, putative, expressed
OS06G0661000	Os06g0661000	LOC_Os06g45030	transposon protein, putative, unclassified, expressed
OS06G0663800	Os06g0663800	LOC_Os06g45340	peptidyl-prolyl cis-trans isomerase, FKBP-type, putative, expressed
OS06G0665400	Os06g0665400	LOC_Os06g45460	OsFBX202 - F-box domain containing protein, expressed
OS06G0665800	Os06g0665800	LOC_Os06g45500	copper-transporting ATPase, putative, expressed
OS06G0675700	Os06g0675700,Os06g0675900	LOC_Os06g46284	glycosyl hydrolase, family 31, putative, expressed
OS06G0677300	Os06g0677300	LOC_Os06g46366	zinc finger, C3HC4 type, domain containing protein, expressed
OS06G0682800	Os06g0682800	LOC_Os06g46890	zinc finger C-x8-C-x5-C-x3-H type family protein, expressed
OS06G0682850	OS06G0682850	NULL	NULL
OS06G0687000	Os06g0687000	LOC_Os06g47250	DUF292 domain containing protein, expressed
OS06G0688400	Os06g0688400	LOC_Os06g47400	OsFBX204 - F-box domain containing protein, expressed
OS06G0689600	Os06g0689600	LOC_Os06g47470	TKL_IRAK_DUF26-lh.2 - DUF26 kinases have homology to DUF26 containing loci, expressed
OS06G0690200	Os06g0690200	LOC_Os06g47530	TKL_IRAK_DUF26-lh.6 - DUF26 kinases have homology to DUF26 containing loci, expressed
OS06G0691400	Os06g0691400	LOC_Os06g47620	peptidase, putative, expressed
OS06G0692800	Os06g0692800	LOC_Os06g47770	expressed protein
OS06G0693000	Os06g0693000	LOC_Os06g47780	TKL_IRAK_DUF26-lh.3 - DUF26 kinases have homology to DUF26 containing loci, expressed
OS06G0693100	Os06g0693100	LOC_Os06g47800	disease resistance protein RGA3, putative, expressed
OS06G0696900	OS06G0696900	NULL	NULL
OS06G0698200	Os06g0698200	LOC_Os06g48290	homeobox associated leucine zipper, putative, expressed
OS06G0700500	Os06g0700500	LOC_Os06g48700	DNA binding protein, putative, expressed
OS06G0706500	Os06g0706400,Os06g0706500	LOC_Os06g49250	peptide transporter PTR2, putative, expressed
OS06G0713800	Os06g0713800	LOC_Os06g49970	alpha-amylase precursor, putative, expressed
OS06G0713900	Os06g0713900	LOC_Os06g49980	expressed protein
OS06G0724500	Os06g0724500	LOC_Os06g50880	WD domain, G-beta repeat domain containing protein, expressed
OS06G0725500	Os06g0725500	LOC_Os06g50980	expressed protein
OS06G0725550	OS06G0725550	NULL	NULL
OS06G0728600	Os06g0728600	LOC_Os06g51250	EF hand family protein, putative, expressed
OS06G0730300	Os06g0730300	LOC_Os06g51390	expressed protein
OS07G0100500	Os07g0100500	LOC_Os07g01060	expressed protein
OS07G0105700	Os07g0105700	LOC_Os07g01490	kinesin motor domain containing protein, putative, expressed
OS07G0105800	Os07g0105800	LOC_Os07g01520	expressed protein
OS07G0108800	Os07g0108800	LOC_Os07g01810	potassium channel protein, putative, expressed
OS07G0109100	Os07g0109100	LOC_Os07g01840	expressed protein
OS07G0109400	Os07g0109400	LOC_Os07g01860	expressed protein
OS07G0113101	Os07g0113100,Os07g0113101	LOC_Os07g02240	transcription factor X1, putative, expressed
OS07G0116800	Os07g0116800	LOC_Os07g02560	NB-ARC domain containing protein, expressed
OS07G0116900	Os07g0116900	LOC_Os07g02570	NB-ARC domain containing protein, expressed
OS07G0117000	Os07g0117000	LOC_Os07g02590	expressed protein
OS07G0117200	Os07g0117200	LOC_Os07g02610	expressed protein
OS07G0117300	Os07g0117300	LOC_Os07g02620	NB-ARC domain containing protein, expressed
OS07G0121000	Os07g0121000	LOC_Os07g02970	expressed protein
OS07G0121100	Os07g0121100	LOC_Os07g02990	expressed protein
OS07G0121200	Os07g0121200	LOC_Os07g03000	receptor-like protein kinase precursor, putative, expressed
OS07G0121401	OS07G0121401	NULL	NULL
OS07G0121500	OS07G0121500	NULL	NULL
OS07G0122200	Os07g0122200	LOC_Os07g03050	expressed protein
OS07G0132700	Os07g0132700	LOC_Os07g04060	expressed protein
OS07G0136300	Os07g0136300	LOC_Os07g04330	expressed protein
OS07G0140232	Os07g0139900,Os07g0140232	LOC_Os07g04730	expressed protein
OS07G0141600	Os07g0141600	LOC_Os07g04850	pre-mRNA-processing factor 31, putative, expressed
OS07G0145800	Os07g0145800	LOC_Os07g05210	dof zinc finger protein 2, putative, expressed
OS07G0147800	Os07g0147800	LOC_Os07g05390	expressed protein
OS07G0152301	Os07g0152301	LOC_Os07g05750	retrotransposon protein, putative, Ty3-gypsy subclass, expressed
OS07G0159500	Os07g0159500	LOC_Os07g06550	expressed protein
OS07G0170100	Os07g0170100	LOC_Os07g07470	transketolase, putative, expressed
OS07G0180800	Os07g0180800	LOC_Os07g08320	RNA recognition motif containing protein, expressed
OS07G0184900	Os07g0184900	LOC_Os07g08729	ATP-dependent DNA helicase 2 subunit 1, putative, expressed
OS07G0186200	Os07g0186200	LOC_Os07g08860	S-domain receptor-like protein kinase, putative, expressed
OS07G0190900	Os07g0190900	LOC_Os07g09320	FHA domain containing protein, putative, expressed
OS07G0191625	OS07G0191625	NULL	NULL
OS07G0191700	Os07g0191700	LOC_Os07g09400	RNA ligase isoform 1, putative, expressed
OS07G0197300	Os07g0197300	LOC_Os07g09900	disease resistance protein RPM1, putative, expressed
OS07G0201800	Os07g0201800	LOC_Os07g10220	anthocyanidin 3-O-glucosyltransferase, putative, expressed
OS07G0204800	Os07g0204800	LOC_Os07g10480	expressed protein
OS07G0216100	OS07G0216100	NULL	NULL
OS07G0222200	Os07g0222200	LOC_Os07g12100	expressed protein
OS07G0231500	Os07g0231500	LOC_Os07g12780	cyclin, putative, expressed
OS07G0232100	Os07g0232100	LOC_Os07g12820	B3 DNA binding domain containing protein
OS07G0237700	OS07G0237700	NULL	NULL
OS07G0238700	Os07g0238700,Os07g0238800	LOC_Os07g13460	expressed protein
OS07G0244400	Os07g0244400	LOC_Os07g14100	pentatricopeptide, putative, expressed
OS07G0248100	Os07g0248100	LOC_Os07g14420	expressed protein
OS07G0258100	Os07g0258100	LOC_Os07g15440	alanyl-tRNA synthetase family protein, expressed
OS07G0260000	Os07g0260000	LOC_Os07g15640	CRR4, putative, expressed
OS07G0261732	OS07G0261732	NULL	NULL
OS07G0268800	Os07g0268800	LOC_Os07g16600	expressed protein
OS07G0269400	Os07g0269400	LOC_Os07g16740	expressed protein
OS07G0270800	Os07g0270800	LOC_Os07g16930	expressed protein
OS07G0273700	Os07g0273700	LOC_Os07g17230	WRKY123, expressed
OS07G0275901	OS07G0275901	NULL	NULL
OS07G0277600	Os07g0277600	LOC_Os07g17689	expressed protein
OS07G0282300	Os07g0282300	LOC_Os07g18154	aldehyde oxidase 4, putative, expressed
OS07G0283050	Os07g0283050	LOC_Os07g18230	lectin-like receptor kinase, putative, expressed
OS07G0283600	Os07g0283600	LOC_Os07g18300	expressed protein
OS07G0285200	Os07g0285200	LOC_Os07g18510	OsFBLD5 - F-box, LRR and FBD domain containing protein, expressed
OS07G0287100	Os07g0287100	LOC_Os07g18720	tetratricopeptide repeat containing protein, putative, expressed
OS07G0290800	Os07g0290800	LOC_Os07g19030	tic22-like family domain containing protein, expressed
OS07G0291300	OS07G0291300	NULL	NULL
OS07G0293000	Os07g0293000	LOC_Os07g19210	cytochrome P450, putative, expressed
OS07G0294100	Os07g0294100	LOC_Os07g19320	stripe rust resistance protein Yr10, putative, expressed
OS07G0408100	Os07g0408100	LOC_Os07g22534	WD domain, G-beta repeat domain containing protein, expressed
OS07G0413700	Os07g0413700	LOC_Os07g23110	poly synthetase 1, putative, expressed
OS07G0414900	Os07g0414900	LOC_Os07g23210	transposon protein, putative, unclassified, expressed
OS07G0417600	Os07g0417600	LOC_Os07g23470	thaumatin, putative, expressed
OS07G0417683	OS07G0417683	NULL	NULL
OS07G0435400	Os07g0435400	LOC_Os07g25440	WD domain, G-beta repeat domain containing protein, expressed
OS07G0435900	Os07g0435900	LOC_Os07g25450	histone-lysine N-methyltransferase, putative, expressed
OS07G0438500	Os07g0438500,Os07g0438550	LOC_Os07g25680	protein kinase domain containing protein, expressed
OS07G0447000	Os07g0447000	LOC_Os07g26560	expressed protein
OS07G0451300	Os07g0451300	LOC_Os07g26870	cytochrome P450, putative, expressed
OS07G0454200	Os07g0454200	LOC_Os07g27120	expressed protein
OS07G0455100	Os07g0455100	LOC_Os07g27180	tetratricopeptide repeat domain containing protein, expressed
OS07G0456700	Os07g0456700	LOC_Os07g27320	glycosyl hydrolase family 10 protein, putative, expressed
OS07G0462000	Os07g0462000	LOC_Os07g27790	glutamate--cysteine ligase, chloroplast precursor, putative, expressed
OS07G0469200	Os07g0469200	LOC_Os07g28614	expressed protein
OS07G0472100	Os07g0472100	LOC_Os07g28900	PPR repeat domain containing protein, putative, expressed
OS07G0472300	Os07g0472300	LOC_Os07g28920	expressed protein
OS07G0476200	Os07g0476200	LOC_Os07g29360	tetratricopeptide repeat domain containing protein, expressed
OS07G0477250	Os07g0477250	LOC_Os07g29440	S-adenosylmethionine synthetase 2, putative, expressed
OS07G0482900	Os07g0482900	LOC_Os07g29960	cytochrome P450, putative, expressed
OS07G0485000	Os07g0485000	LOC_Os07g30160	trehalose phosphatase, putative, expressed
OS07G0485366	Os07g0485300,Os07g0485366	LOC_Os07g30190	retrotransposon protein, putative, unclassified, expressed
OS07G0486100	Os07g0486100	LOC_Os07g30250	RFT1, putative, expressed
OS07G0493100	Os07g0493033,Os07g0493100	LOC_Os07g31110	transposon protein, putative, CACTA, En/Spm sub-class, expressed
OS07G0493400	Os07g0493400	LOC_Os07g31140	3-oxo-5-alpha-steroid 4-dehydrogenase, putative, expressed
OS07G0493800	Os07g0493800	LOC_Os07g31190	OsWAK71 - OsWAK receptor-like cytoplasmic kinase OsWAK-RLCK, expressed
OS07G0503900	Os07g0503900	LOC_Os07g32060	UDP-glucoronosyl/UDP-glucosyl transferase, putative, expressed
OS07G0508101	OS07G0508101	NULL	NULL
OS07G0510300	Os07g0510300,Os07g0510350	LOC_Os07g32610	expressed protein
OS07G0517400	Os07g0517400	LOC_Os07g33370	IQ calmodulin-binding motif family protein, expressed
OS07G0517800	Os07g0517800	LOC_Os07g33410	ATPase, AAA family protein, expressed
OS07G0518500	Os07g0518500	LOC_Os07g33480	cytochrome P450 domain containing protein, expressed
OS07G0520200	OS07G0520200	NULL	NULL
OS07G0520900	Os07g0520900	LOC_Os07g33670	patatin-like phospholipase family protein, expressed
OS07G0521100	Os07g0521100	LOC_Os07g33690	NBS-LRR type disease resistance protein Hom-F, putative, expressed
OS07G0521300	Os07g0521300	LOC_Os07g33710	expressed protein
OS07G0522500	Os07g0522500	LOC_Os07g33780	pleiotropic drug resistance protein 5, putative, expressed
OS07G0522600	Os07g0522600	LOC_Os07g33790	glutamate receptor 3.4 precursor, putative, expressed
OS07G0531400	Os07g0531400	LOC_Os07g34710	peroxidase precursor, putative, expressed
OS07G0532500	Os07g0532500	LOC_Os07g34830	ankyrin repeat family protein, putative, expressed
OS07G0532800	Os07g0532800	LOC_Os07g34850	aspartic proteinase nepenthesin, putative, expressed
OS07G0532866	OS07G0532866	NULL	NULL
OS07G0533600	Os07g0533600	LOC_Os07g34920	aspartic proteinase nepenthesin precursor, putative, expressed
OS07G0534100	OS07G0534100	NULL	NULL
OS07G0534500	Os07g0534500	LOC_Os07g34980	TKL_IRAK_DUF26-lh.9 - DUF26 kinases have homology to DUF26 containing loci, expressed
OS07G0537200	Os07g0537200	LOC_Os07g35280	TKL_IRAK_DUF26-lc.1 - DUF26 kinases have homology to DUF26 containing loci, expressed
OS07G0537250	OS07G0537250	NULL	NULL
OS07G0537400	Os07g0537400	LOC_Os07g35300	TKL_IRAK_DUF26-lc.11 - DUF26 kinases have homology to DUF26 containing loci, expressed
OS07G0537500	Os07g0537500	LOC_Os07g35310	TKL_IRAK_DUF26-lc.12 - DUF26 kinases have homology to DUF26 containing loci, expressed
OS07G0537550	OS07G0537550	NULL	NULL
OS07G0538200	Os07g0538200	LOC_Os07g35370	TKL_IRAK_DUF26-lc.15 - DUF26 kinases have homology to DUF26 containing loci, expressed
OS07G0538350	OS07G0538350	NULL	NULL
OS07G0538400	Os07g0538400	LOC_Os07g35390	TKL_IRAK_DUF26-lc.17 - DUF26 kinases have homology to DUF26 containing loci, expressed
OS07G0538700	Os07g0538700	LOC_Os07g35410	TKL_IRAK_DUF26-lc.18 - DUF26 kinases have homology to DUF26 containing loci, expressed
OS07G0541400	Os07g0541400	LOC_Os07g35690	TKL_IRAK_DUF26-lc.3 - DUF26 kinases have homology to DUF26 containing loci, expressed
OS07G0541500	Os07g0541500	LOC_Os07g35700	TKL_IRAK_DUF26-lc.4 - DUF26 kinases have homology to DUF26 containing loci, expressed
OS07G0541800	Os07g0541800	LOC_Os07g35740	TKL_IRAK_DUF26-ld.2 - DUF26 kinases have homology to DUF26 containing loci, expressed
OS07G0541900	Os07g0541900	LOC_Os07g35750	TKL_IRAK_DUF26-ld.3 - DUF26 kinases have homology to DUF26 containing loci, expressed
OS07G0542067	OS07G0542067	NULL	NULL
OS07G0542400	Os07g0542400	LOC_Os07g35790	TKL_IRAK_DUF26-ld.5 - DUF26 kinases have homology to DUF26 containing loci, expressed
OS07G0542600	Os07g0542600	LOC_Os07g35810	TKL_IRAK_DUF26-ld.6 - DUF26 kinases have homology to DUF26 containing loci, expressed
OS07G0546750	Os07g0546750	LOC_Os07g36260	transposon protein, putative, Pong sub-class, expressed
OS07G0557400	Os07g0557400	LOC_Os07g37130	FUR1, putative, expressed
OS07G0569000	Os07g0569000	LOC_Os07g38160	expressed protein
OS07G0569800	Os07g0569800	LOC_Os07g38250	expressed protein
OS07G0570300	Os07g0570300	LOC_Os07g38270	insulin-degrading enzyme, putative, expressed
OS07G0570500	Os07g0570500	LOC_Os07g38280	insulin-degrading enzyme, putative, expressed
OS07G0576000	Os07g0576000	LOC_Os07g38850	prenyltransferase, putative, expressed
OS07G0577801	OS07G0577801	NULL	NULL
OS07G0581300	Os07g0581300	LOC_Os07g39300	expressed protein
OS07G0582500	Os07g0582500	LOC_Os07g39360	transporter family protein, putative, expressed
OS07G0583700	Os07g0583700	LOC_Os07g39480	WRKY87, expressed
OS07G0588500	Os07g0588500	LOC_Os07g39950	mitotic checkpoint protein, putative, expressed
OS07G0597400	Os07g0597400	LOC_Os07g40640	expressed protein
OS07G0603100	Os07g0603100	LOC_Os07g41180	RNA-binding protein-like, putative, expressed
OS07G0603750	OS07G0603750	NULL	NULL
OS07G0607800	Os07g0607800	LOC_Os07g41694	acidic leucine-rich nuclear phosphoprotein 32-related protein 1, putative, expressed
OS07G0609550	Os07g0609550	LOC_Os07g41840	expressed protein
OS07G0612500	Os07g0612500	LOC_Os07g42150	transcription initiation factor IID, putative, expressed
OS07G0614100	Os07g0614100	LOC_Os07g42260	peptidase, T1 family, putative, expressed
OS07G0615200	Os07g0615200	LOC_Os07g42370	zinc-finger protein, putative, expressed
OS07G0616100	OS07G0616100	NULL	NULL
OS07G0617100	Os07g0617100	LOC_Os07g42520	dirigent, putative, expressed
OS07G0619100	Os07g0619100	LOC_Os07g42700	paramyosin, putative, expressed
OS07G0621800	Os07g0621800	LOC_Os07g42924	dehydrogenase, putative, expressed
OS07G0624100	Os07g0624100	LOC_Os07g43120	transposon protein, putative, unclassified, expressed
OS07G0626500	Os07g0626500	LOC_Os07g43350	expressed protein
OS07G0629500	Os07g0629500	LOC_Os07g43604	expressed protein
OS07G0632600	Os07g0632600	LOC_Os07g43870	heat shock protein DnaJ, putative, expressed
OS07G0633300	Os07g0633300	LOC_Os07g43960	expressed protein
OS07G0638300	Os07g0638300	LOC_Os07g44430	peroxiredoxin, putative, expressed
OS07G0642900	Os07g0642900	LOC_Os07g44840	bacterial transferase hexapeptide domain containing protein, expressed
OS07G0643000	Os07g0643000	LOC_Os07g44850	gibberellin receptor GID1L2, putative, expressed
OS07G0643400	Os07g0643400	LOC_Os07g44890	gibberellin receptor GID1L2, putative, expressed
OS07G0643500	OS07G0643500	NULL	NULL
OS07G0644200	Os07g0644200	LOC_Os07g44960	nodulation protein-related, putative, expressed
OS07G0644300	Os07g0644300	LOC_Os07g44970	XPA-binding protein 2, putative, expressed
OS07G0644400	OS07G0644400	NULL	NULL
OS07G0644550	OS07G0644550	NULL	NULL
OS07G0644600	Os07g0644600	LOC_Os07g45000	cytochrome P450, putative, expressed
OS07G0644700	Os07g0644700	LOC_Os07g45010	expressed protein
OS07G0646000	Os07g0646000	LOC_Os07g45160	SAC3/GANP family protein, expressed
OS07G0646300	Os07g0646300	LOC_Os07g45195	expressed protein
OS07G0649100	Os07g0649100	LOC_Os07g45480	expressed protein
OS07G0649300	Os07g0649300	LOC_Os07g45490	expressed protein
OS07G0649500	Os07g0649500	LOC_Os07g45510	expressed protein
OS07G0650600	Os07g0650600	LOC_Os07g45570	expressed protein
OS07G0651600	Os07g0651600	LOC_Os07g45760	expressed protein
OS07G0653000	Os07g0653000,Os07g0653050	LOC_Os07g45950	expressed protein
OS07G0653050	Os07g0653000,Os07g0653050	LOC_Os07g45950	expressed protein
OS07G0654500	OS07G0654500	NULL	NULL
OS07G0654700	Os07g0654700	LOC_Os07g46080	expressed protein
OS07G0657600	Os07g0657600	LOC_Os07g46400	expressed protein
OS07G0659500	Os07g0659500	LOC_Os07g46540	condensin complex subunit 1, putative, expressed
OS07G0662500	Os07g0662500	LOC_Os07g46750	elongation factor protein, putative, expressed
OS07G0663300	Os07g0663300	LOC_Os07g46820	CUG-BP- and ETR-3-like factor 5, putative, expressed
OS07G0663600	Os07g0663600	LOC_Os07g46840	oxidoreductase, short chain dehydrogenase/reductase family domain containing protein, expressed
OS07G0665700	Os07g0665700	LOC_Os07g47030	expressed protein
OS07G0666400	Os07g0666400	LOC_Os07g47080	expressed protein
OS07G0667000	Os07g0667000	LOC_Os07g47110	OsFBT11 - F-box and tubby domain containing protein, expressed
OS07G0667800	OS07G0667800	NULL	NULL
OS07G0668100	Os07g0668100	LOC_Os07g47194	GEX1, putative, expressed
OS07G0673600	OS07G0673600	NULL	NULL
OS07G0674300	Os07g0674300	LOC_Os07g47720	PPR repeat domain containing protein, putative, expressed
OS07G0677900	Os07g0677900	LOC_Os07g48080	expressed protein
OS07G0679700	Os07g0679700	LOC_Os07g48200	B3 DNA binding domain containing protein, putative, expressed
OS07G0681100	Os07g0681100	LOC_Os07g48310	inactive receptor kinase At2g26730 precursor, putative, expressed
OS07G0681500	Os07g0681500	LOC_Os07g48350	structural constituent of ribosome, putative, expressed
OS07G0682700	Os07g0682700	LOC_Os07g48420	expressed protein
OS07G0685700	Os07g0685700	LOC_Os07g48630	ethylene-insensitive 3, putative, expressed
OS07G0688200	Os07g0688200	LOC_Os07g48870	MYB family transcription factor, putative, expressed
OS07G0689800	Os07g0689800	LOC_Os07g49000	DNAJ heat shock N-terminal domain-containing protein, putative, expressed
OS07G0690800	Os07g0690800	LOC_Os07g49070	expressed protein
OS07G0691600	Os07g0691600	LOC_Os07g49120	sex determination protein tasselseed-2, putative, expressed
OS07G0691700	Os07g0691700	LOC_Os07g49140	expressed protein
OS07G0692900	Os07g0692900	LOC_Os07g49230	ubiquitin-activating enzyme, putative, expressed
OS07G0693100	Os07g0693100	LOC_Os07g49250	thiamine pyrophosphate enzyme, C-terminal TPP binding domain containing protein, expressed
OS07G0695400	Os07g0695400	LOC_Os07g49480	KIP1, putative, expressed
OS08G0102100	Os08g0102100	LOC_Os08g01180	nicalin, putative, expressed
OS08G0102800	Os08g0102800	LOC_Os08g01240	expressed protein
OS08G0103600	Os08g0103600	LOC_Os08g01320	C3-BTB1 - Bric-a-Brac, Tramtrack, Broad Complex BTB domain with C3 subfamily conserved sequence, expressed
OS08G0106900	Os08g0106700,Os08g0106900	LOC_Os08g01570	retrotransposon protein, putative, unclassified, expressed
OS08G0107600	Os08g0107600	LOC_Os08g01630	DNA repair metallo-beta-lactamase, putative, expressed
OS08G0109100	Os08g0109100	LOC_Os08g01750	SAC domain containing protein, putative, expressed
OS08G0109150	OS08G0109150	NULL	NULL
OS08G0112000	Os08g0112000	LOC_Os08g02000	retrotransposon protein, putative, unclassified, expressed
OS08G0112500	Os08g0112500	LOC_Os08g02050	protein kinase family protein, putative, expressed
OS08G0124000	Os08g0124000	LOC_Os08g02996	receptor-like kinase, putative, expressed
OS08G0124100	Os08g0124100	LOC_Os08g03002	lectin-like receptor kinase 1, putative, expressed
OS08G0124600	Os08g0124600	LOC_Os08g03030	retrotransposon protein, putative, Ty1-copia subclass, expressed
OS08G0129800	Os08g0129800	LOC_Os08g03579	expressed protein
OS08G0131000	Os08g0131000	LOC_Os08g03676	pentatricopeptide, putative, expressed
OS08G0135800	Os08g0135800	LOC_Os08g04170	zinc finger C-x8-C-x5-C-x3-H type family protein, expressed
OS08G0138700	Os08g0138700	LOC_Os08g04420	tyrosine protein kinase domain containing protein, putative, expressed
OS08G0140700	Os08g0140700,Os08g0140850	LOC_Os08g04580	csAtPR5, putative, expressed
OS08G0141700	Os08g0141700	LOC_Os08g04650	pectinesterase inhibitor domain containing protein, expressed
OS08G0143700	Os08g0143700	LOC_Os08g04810	serine esterase family protein, putative, expressed
OS08G0147001	OS08G0147001	NULL	NULL
OS08G0149100	OS08G0149100	NULL	NULL
OS08G0149566	OS08G0149566	NULL	NULL
OS08G0149850	Os08g0149800,Os08g0149850	LOC_Os08g05410	expressed protein
OS08G0150200	OS08G0150200	NULL	NULL
OS08G0158300	Os08g0158300	LOC_Os08g06180	reticuline oxidase precursor, putative
OS08G0158400	Os08g0158400	LOC_Os08g06190	berberine and berberine like domain containing protein, expressed
OS08G0159900	Os08g0159900	LOC_Os08g06344	transposon protein, putative, CACTA, En/Spm sub-class, expressed
OS08G0164000	Os08g0164000	LOC_Os08g06700	expressed protein
OS08G0164100	Os08g0164100	LOC_Os08g06710	OsFBDUF42 - F-box and DUF domain containing protein, expressed
OS08G0170700	Os08g0170700	LOC_Os08g07380	retrotransposon protein, putative, unclassified, expressed
OS08G0170800	Os08g0170800	LOC_Os08g07390	mla1, putative, expressed
OS08G0172300	Os08g0172300	LOC_Os08g07550	hAT dimerisation domain-containing protein, putative, expressed
OS08G0174100	Os08g0174100	LOC_Os08g07720	transferase family protein, putative, expressed
OS08G0174800	Os08g0174800	LOC_Os08g07774	disease resistance protein RPM1, putative, expressed
OS08G0177500	Os08g0177500	LOC_Os08g08020	expressed protein
OS08G0178300	Os08g0178300	LOC_Os08g08080	BUD13, putative, expressed
OS08G0190300	Os08g0190300	LOC_Os08g09110	NB-ARC domain containing protein, expressed
OS08G0191433	Os08g0191433,Os08g0191500	LOC_Os08g09230	starch synthase III, putative, expressed
OS08G0191900	Os08g0191900	LOC_Os08g09270	pentatricopeptide, putative, expressed
OS08G0195800	Os08g0195800	LOC_Os08g09640	OsFBL43 - F-box domain and LRR containing protein, expressed
OS08G0202300	Os08g0202300	LOC_Os08g10244	retrotransposon protein, putative, unclassified, expressed
OS08G0202400	Os08g0202400	LOC_Os08g10260	NBS-LRR disease resistance protein, putative, expressed
OS08G0203150	OS08G0203150	NULL	NULL
OS08G0203300	Os08g0203300	LOC_Os08g10300	SHR5-receptor-like kinase, putative, expressed
OS08G0203600	Os08g0203600	LOC_Os08g10320	SHR5-receptor-like kinase, putative, expressed
OS08G0203900	Os08g0203900	LOC_Os08g10350	integral membrane family protein, putative, expressed
OS08G0205150	Os08g0205150	LOC_Os08g10440	NBS-LRR disease resistance protein, putative, expressed
OS08G0205900	Os08g0205900	LOC_Os08g10510	aminotransferase, putative, expressed
OS08G0234200	Os08g0234200	LOC_Os08g13699	expressed protein
OS08G0235651	Os08g0235600,Os08g0235651	LOC_Os08g13800	NB-ARC domain containing protein, expressed
OS08G0235800	Os08g0235800	LOC_Os08g13840	WRKY25, expressed
OS08G0236400	Os08g0236400	LOC_Os08g13870	S-locus lectin protein kinase family protein, putative, expressed
OS08G0236900	Os08g0236900	LOC_Os08g13880	expressed protein
OS08G0240566	Os08g0240566	LOC_Os08g14210	glycosyl hydrolases family 16, putative, expressed
OS08G0243866	Os08g0243833,Os08g0243866	LOC_Os08g14610	DRD1, putative, expressed
OS08G0246001	OS08G0246001	NULL	NULL
OS08G0246800	Os08g0246800,Os08g0246700	LOC_Os08g14880	transposon protein, putative, unclassified, expressed
OS08G0247700	Os08g0247700	LOC_Os08g14950	receptor-like protein kinase 2 precursor, putative, expressed
OS08G0248100	Os08g0248100	LOC_Os08g14990	receptor-like protein kinase 2 precursor, putative, expressed
OS08G0264700	Os08g0264700	LOC_Os08g16430	phytochrome P450, putative, expressed
OS08G0266700	Os08g0266700	LOC_Os08g16610	Rad21 / Rec8 like protein, putative, expressed
OS08G0272200	Os08g0272200	LOC_Os08g17080	PPR repeat domain containing protein, putative, expressed
OS08G0273783	OS08G0273783	NULL	NULL
OS08G0289400	Os08g0289400	LOC_Os08g19250	retrotransposon protein, putative, Ty1-copia subclass, expressed
OS08G0290100	Os08g0290100	LOC_Os08g19320	aberrant root formation protein 4, putative, expressed
OS08G0290700	Os08g0290700	LOC_Os08g19420	O-methyltransferase, putative, expressed
OS08G0295100	Os08g0295000,Os08g0295100	LOC_Os08g19830	ubiquitin family protein, putative, expressed
OS08G0299300	Os08g0299300	LOC_Os08g20410	expressed protein
OS08G0300100	Os08g0300100	LOC_Os08g20500	retrotransposon protein, putative, unclassified, expressed
OS08G0305100	OS08G0305100	NULL	NULL
OS08G0324200	Os08g0324200	LOC_Os08g23460	harpin-induced protein 1 domain containing protein, expressed
OS08G0324600	Os08g0324600	LOC_Os08g23520	retrotransposon protein, putative, Ty3-gypsy subclass, expressed
OS08G0326300	Os08g0326300	LOC_Os08g23700	transposon protein, putative, Mutator sub-class, expressed
OS08G0331900	Os08g0331900	LOC_Os08g24310	receptor-like protein kinase precursor, putative, expressed
OS08G0336700	Os08g0336700	LOC_Os08g24900	retrotransposon protein, putative, unclassified, expressed
OS08G0337800	Os08g0337800	LOC_Os08g25030	plant protein of unknown function domain containing protein, expressed
OS08G0343550	OS08G0343550	NULL	NULL
OS08G0352100	Os08g0352100	LOC_Os08g26350	expressed protein
OS08G0357000	Os08g0357000	LOC_Os08g26870	wound responsive protein, putative, expressed
OS08G0360200	Os08g0360200	LOC_Os08g27160	expressed protein
OS08G0367300	Os08g0367300	LOC_Os08g28010	expressed protein
OS08G0371608	Os08g0371608	LOC_Os08g28410	retinal pigment epithelial membrane protein, expressed
OS08G0372700	Os08g0372700	LOC_Os08g28540	resistance protein LR10, putative, expressed
OS08G0373000	Os08g0373000	LOC_Os08g28570	resistance protein, putative, expressed
OS08G0379000	Os08g0379000	LOC_Os08g29124	expressed protein
OS08G0386900	Os08g0386900	LOC_Os08g29730	intracellular protein transport protein USO1-related, putative, expressed
OS08G0392300	Os08g0392300	LOC_Os08g30230	conserved hypothetical protein
OS08G0392500	Os08g0392500	LOC_Os08g30260	retrotransposon protein, putative, unclassified, expressed
OS08G0395500	Os08g0395500	LOC_Os08g30490	expressed protein
OS08G0396500	Os08g0396500	LOC_Os08g30590	C1-like domain containing protein, expressed
OS08G0399300	Os08g0399300	LOC_Os08g30850	YDG/SRA domain containing protein, expressed
OS08G0401800	Os08g0401800	LOC_Os08g31060	phospholipase D alpha 1, putative, expressed
OS08G0402100	Os08g0402100	LOC_Os08g31080	DUF260 domain containing protein, putative, expressed
OS08G0404400	Os08g0404350,Os08g0404400	LOC_Os08g31240	FACT complex subunit SPT16, putative, expressed
OS08G0404900	Os08g0404900	LOC_Os08g31280	DC1, putative, expressed
OS08G0406600	Os08g0406600	LOC_Os08g31430	MBTB27 - Bric-a-Brac, Tramtrack, Broad Complex BTB domain with Meprin and TRAF Homology MATH domain, expressed
OS08G0412800	Os08g0412800	LOC_Os08g31860	expressed protein
OS08G0413100	Os08g0413100	LOC_Os08g31880	expressed protein
OS08G0419000	Os08g0419000	LOC_Os08g32350	expressed protein
OS08G0421300	Os08g0421300	LOC_Os08g32560	expressed protein
OS08G0421800	Os08g0421800	LOC_Os08g32600	STE_MEKK_ste11_MAP3K.21 - STE kinases include homologs to sterile 7, sterile 11 and sterile 20 from yeast, expressed
OS08G0422600	Os08g0422600	LOC_Os08g32690	expressed protein
OS08G0426100	Os08g0426100	LOC_Os08g33010	OsFBDUF45 - F-box and DUF domain containing protein, expressed
OS08G0428100	Os08g0428100	LOC_Os08g33140	F-box domain containing protein, expressed
OS08G0433300	Os08g0433300,Os08g0433350	LOC_Os08g33650	SET domain-containing protein, putative, expressed
OS08G0434201	OS08G0434201	NULL	NULL
OS08G0434700	Os08g0434700	LOC_Os08g33750	myb-like DNA-binding domain containing protein, expressed
OS08G0442000	Os08g0442000	LOC_Os08g34320	expressed protein
OS08G0442300	Os08g0442300,Os08g0442350	LOC_Os08g34340	DUF593 domain containing protein, expressed
OS08G0446200	Os08g0446200	LOC_Os08g34640	receptor-like protein kinase precursor, putative, expressed
OS08G0446250	OS08G0446250	NULL	NULL
OS08G0447500	Os08g0447500	LOC_Os08g34760	expressed protein
OS08G0451400	Os08g0451400	LOC_Os08g35000	ARID/BRIGHT DNA-binding domain containing protein, expressed
OS08G0460800	Os08g0460800	LOC_Os08g35870	OsFBL48 - F-box domain and LRR containing protein, expressed
OS08G0461100	Os08g0461100	LOC_Os08g35910	expressed protein
OS08G0466200	Os08g0466200	LOC_Os08g36340	potassium transporter, putative, expressed
OS08G0466600	OS08G0466600	NULL	NULL
OS08G0473600	Os08g0473600	LOC_Os08g36900	alpha-amylase precursor, putative, expressed
OS08G0475000	Os08g0475000	LOC_Os08g37030	gibberellin receptor GID1L2, putative, expressed
OS08G0477100	Os08g0477100	LOC_Os08g37210	patatin, putative, expressed
OS08G0485300	Os08g0485300	LOC_Os08g37860	expressed protein
OS08G0504800	Os08g0504800	LOC_Os08g39460	AGC_PVPK_like_CDK8.2 - ACG kinases include homologs to PKA, PKG and PKC, expressed
OS08G0507701	OS08G0507701	NULL	NULL
OS08G0513051	OS08G0513051	NULL	NULL
OS08G0517900	Os08g0517900	LOC_Os08g40610	30S ribosomal protein S16, putative, expressed
OS08G0518200	Os08g0518200	LOC_Os08g40630	mTERF domain containing protein, expressed
OS08G0522700	Os08g0522700	LOC_Os08g41120	MBTB29 - Bric-a-Brac, Tramtrack, Broad Complex BTB domain with Meprin and TRAF Homology MATH domain, expressed
OS08G0524800	Os08g0524800	LOC_Os08g41320	BHLH transcription factor, putative, expressed
OS08G0525700	Os08g0525700	LOC_Os08g41400	expressed protein
OS08G0528100	Os08g0528000,Os08g0528100	LOC_Os08g41630	ubiquitin carboxyl-terminal hydrolase family protein, expressed
OS08G0535900	OS08G0535900	NULL	NULL
OS08G0539400	Os08g0539400	LOC_Os08g42670	resistance protein, putative, expressed
OS08G0539700	Os08g0539700	LOC_Os08g42700	resistance protein, putative, expressed
OS08G0540500	Os08g0540500	LOC_Os08g42760	methyltransferase domain containing protein, expressed
OS08G0542500	OS08G0542500	NULL	NULL
OS08G0542600	Os08g0542600	LOC_Os08g42950	haloacid dehalogenase-like hydrolase family protein, putative, expressed
OS08G0543100	Os08g0543100	LOC_Os08g43010	disease resistance RPP13-like protein 1, putative, expressed
OS08G0549600	Os08g0549600	LOC_Os08g43600	bZIP transcription factor domain containing protein, expressed
OS08G0552666	OS08G0552666	NULL	NULL
OS08G0555200	OS08G0555200	NULL	NULL
OS08G0555300	Os08g0555300	LOC_Os08g44150	transmembrane 9 superfamily member, putative, expressed
OS08G0555400	Os08g0555400	LOC_Os08g44160	expressed protein
OS08G0555800	Os08g0555800	LOC_Os08g44180	expressed protein
OS08G0560500	Os08g0560500	LOC_Os08g44640	OsSCP41 - Putative Serine Carboxypeptidase homologue, expressed
OS08G0562700	Os08g0562700	LOC_Os08g44860	aminopeptidase, putative, expressed
OS08G0562800	Os08g0562800	LOC_Os08g44870	MATE efflux family protein, putative, expressed
OS08G0564100	Os08g0564100	LOC_Os08g45010	ABC transporter, ATP-binding protein, putative, expressed
OS08G0564800	Os08g0564800	LOC_Os08g45080	expressed protein
OS09G0103100	Os09g0103100	LOC_Os09g01590	triacylglycerol lipase 1 precursor, putative, expressed
OS09G0103150	OS09G0103150	NULL	NULL
OS09G0106200	OS09G0106200	NULL	NULL
OS09G0110100	Os09g0110100	LOC_Os09g02250	transposon protein, putative, unclassified, expressed
OS09G0110200	Os09g0110200	LOC_Os09g02260	PPR repeat containing protein, putative, expressed
OS09G0120100	Os09g0120100	LOC_Os09g03210	expressed protein
OS09G0121050	OS09G0121050	NULL	NULL
OS09G0121900	Os09g0121900	LOC_Os09g03490	carboxylic ester hydrolase, putative, expressed
OS09G0134900	Os09g0134900	LOC_Os09g04924	expressed protein
OS09G0135200	OS09G0135200	NULL	NULL
OS09G0240500	Os09g0240500	LOC_Os09g06499	sulfate transporter 4.1, chloroplast precursor, putative, expressed
OS09G0241200	Os09g0241200	LOC_Os09g06570	expressed protein
OS09G0248200	Os09g0248200	LOC_Os09g07360	frigida, putative, expressed
OS09G0252800	Os09g0252700,Os09g0252800	LOC_Os09g07900	ubiquitin-protein ligase 1, putative, expressed
OS09G0254050	OS09G0254050	NULL	NULL
OS09G0255400	Os09g0255400	LOC_Os09g08130	indole-3-glycerol phosphate synthase, chloroplast precursor, putative, expressed
OS09G0257000	Os09g0257000	LOC_Os09g08300	expressed protein
OS09G0257900	OS09G0257900	NULL	NULL
OS09G0259200	Os09g0259200	LOC_Os09g08490	seven-transmembrane-domain protein 1, putative, expressed
OS09G0268100	Os09g0268100	LOC_Os09g09510	legume lectins beta domain containing protein, expressed
OS09G0268600	Os09g0268600	LOC_Os09g09540	transposon protein, putative, unclassified, expressed
OS09G0270700	Os09g0270700	LOC_Os09g09750	disease resistance protein RPM1, putative, expressed
OS09G0272900	Os09g0272900	LOC_Os09g10054	disease resistance protein RPS2, putative, expressed
OS09G0278300	Os09g0278300	LOC_Os09g10650	phosphatidylinositol-4-phosphate 5-Kinase family protein, putative, expressed
OS09G0290900	Os09g0290900	LOC_Os09g11890	expressed protein
OS09G0304400	Os09g0304400	LOC_Os09g13400	expressed protein
OS09G0304500	Os09g0304500	LOC_Os09g13410	plant protein of unknown function domain containing protein, expressed
OS09G0305300	Os09g0305300	LOC_Os09g13470	plant protein of unknown function domain containing protein, expressed
OS09G0317700	Os09g0317700	LOC_Os09g14880	transposon protein, putative, Pong sub-class, expressed
OS09G0322200	Os09g0322200	LOC_Os09g15340	hydrolase, NUDIX family, domain containing protein, expressed
OS09G0330700	Os09g0330700	LOC_Os09g16160	ankyrin repeat family protein, putative, expressed
OS09G0332300	Os09g0332300	LOC_Os09g16290	ABC-2 type transporter, putative, expressed
OS09G0334800	Os09g0334800	LOC_Os09g16540	protein kinase, putative, expressed
OS09G0337300	Os09g0337300	LOC_Os09g16760	ankyrin repeat family protein, putative, expressed
OS09G0339000	Os09g0339000	LOC_Os09g16950	cysteine-rich receptor-like protein kinase 25 precursor, putative, expressed
OS09G0344400	Os09g0344400	LOC_Os09g17540	OsFBX322 - F-box domain containing protein, expressed
OS09G0344700	Os09g0344700	LOC_Os09g17580	expressed protein
OS09G0345500	Os09g0345500	LOC_Os09g17660	expressed protein
OS09G0346400	Os09g0346400	LOC_Os09g17730	proton pump interactor, putative, expressed
OS09G0348400	Os09g0348400	LOC_Os09g17880	senescence-induced receptor-like serine/threonine-protein kinase precursor, putative, expressed
OS09G0348600	Os09g0348600	LOC_Os09g17910	expressed protein
OS09G0350900	Os09g0350900	LOC_Os09g18159	light repressible receptor protein kinase, putative, expressed
OS09G0351700	Os09g0351700,Os09g0351800	LOC_Os09g18230	expressed protein
OS09G0356000	Os09g0356000	LOC_Os09g19140	senescence-induced receptor-like serine/threonine-protein kinase precursor, putative, expressed
OS09G0356800	Os09g0356800	LOC_Os09g19229	protein kinase domain containing protein, expressed
OS09G0358000	Os09g0358000	LOC_Os09g19350	expressed protein
OS09G0362900	Os09g0362900	LOC_Os09g19830	histone-lysine N-methyltransferase, putative, expressed
OS09G0365300	Os09g0365300	LOC_Os09g20030	disease resistance RPP13-like protein 1, putative, expressed
OS09G0366800	Os09g0366800	LOC_Os09g20170	expressed protein
OS09G0368900	Os09g0368900	LOC_Os09g20340	DUF630/DUF632 domains containing protein, putative, expressed
OS09G0375100	Os09g0375100	LOC_Os09g20830	heat shock factor-binding protein 1, putative, expressed
OS09G0375700	OS09G0375700	NULL	NULL
OS09G0383400	Os09g0383400	LOC_Os09g21520	DEAD-box ATP-dependent RNA helicase, putative, expressed
OS09G0387000	Os09g0387000	LOC_Os09g21810	retrotransposon protein, putative, unclassified, expressed
OS09G0401300	Os09g0401300,Os09g0401200	LOC_Os09g23650	FAM10 family protein, putative, expressed
OS09G0410300	Os09g0409950,Os09g0410125,Os09g0410300	LOC_Os09g24440	expressed protein
OS09G0415050	OS09G0415050	NULL	NULL
OS09G0415300	Os09g0415300	LOC_Os09g24870	expressed protein
OS09G0417400	Os09g0417400	LOC_Os09g25040	joka8, putative, expressed
OS09G0418000	Os09g0418000	LOC_Os09g25090	CAMK_KIN1/SNF1/Nim1_like.34 - CAMK includes calcium/calmodulin depedent protein kinases, expressed
OS09G0420900	Os09g0420900	LOC_Os09g25330	BTBN19 - Bric-a-Brac, Tramtrack, Broad Complex BTB domain with non-phototropic hypocotyl 3 NPH3 domain, expressed
OS09G0422600	Os09g0422600	LOC_Os09g25500	expressed protein
OS09G0425200	Os09g0425200	LOC_Os09g25690	retrotransposon protein, putative, unclassified, expressed
OS09G0428900	Os09g0428900	LOC_Os09g25950	regulator protein, putative, expressed
OS09G0429100	Os09g0429100	LOC_Os09g25970	expressed protein
OS09G0429400	Os09g0429400	LOC_Os09g25990	glutamate receptor, putative, expressed
OS09G0430600	Os09g0430600	LOC_Os09g26100	ZOS9-10 - C2H2 zinc finger protein, expressed
OS09G0431500	Os09g0431500	LOC_Os09g26180	transcription initiation factor TFIID subunit 10, putative, expressed
OS09G0435250	Os09g0435250	LOC_Os09g26470	zinc finger, C3HC4 type family protein, expressed
OS09G0435700	Os09g0435700	LOC_Os09g26500	CXE carboxylesterase, putative, expressed
OS09G0436300	Os09g0436300	LOC_Os09g26540	expressed protein
OS09G0436400	Os09g0436400	LOC_Os09g26550	protease Do-like 14, putative, expressed
OS09G0436700	Os09g0436700	LOC_Os09g26560	expressed protein
OS09G0439400	Os09g0439400	LOC_Os09g26800	polygalacturonase, putative, expressed
OS09G0441625	Os09g0441600,Os09g0441625	LOC_Os09g26970	retrotransposon protein, putative, unclassified, expressed
OS09G0442800	Os09g0442800	LOC_Os09g27070	E2F-related protein, putative, expressed
OS09G0443400	Os09g0443400	LOC_Os09g27135	expressed protein
OS09G0451000	Os09g0451000	LOC_Os09g27750	1-aminocyclopropane-1-carboxylate oxidase 1, putative, expressed
OS09G0452300	Os09g0452300	LOC_Os09g27900	plastidic glucose transporter 1, putative, expressed
OS09G0455900	Os09g0455900	LOC_Os09g28280	gibberellin receptor GID1L2, putative, expressed
OS09G0460200	Os09g0460200	LOC_Os09g28610	protein transport protein, putative, expressed
OS09G0462875	Os09g0462875,Os09g0462901	LOC_Os09g28830	OsSCP42 - Putative Serine Carboxypeptidase homologue, expressed
OS09G0463800	OS09G0463800	NULL	NULL
OS09G0463900	Os09g0463900	LOC_Os09g28900	basic helix-loop-helix, putative, expressed
OS09G0467400	Os09g0467400	LOC_Os09g29239	purine permease, putative, expressed
OS09G0471200	Os09g0471200	LOC_Os09g29510	OsWAK80 - OsWAK receptor-like protein kinase, expressed
OS09G0485950	OS09G0485950	NULL	NULL
OS09G0491100	Os09g0491100	LOC_Os09g31430	Os9bglu30 - beta-glucosidase, similar to Os4bglu12 exoglucanase, expressed
OS09G0491238	OS09G0491238	NULL	NULL
OS09G0491708	Os09g0491708	LOC_Os09g31470	AT hook motif domain containing protein, expressed
OS09G0491740	Os09g0491740	LOC_Os09g31478	auxin efflux carrier component, putative, expressed
OS09G0495300	Os09g0495300	LOC_Os09g32140	expressed protein
OS09G0497500	Os09g0497500	LOC_Os09g32230	vignain precursor, putative, expressed
OS09G0501100	OS09G0501100	NULL	NULL
OS09G0515100	Os09g0515100	LOC_Os09g33980	bromodomain protein 103, putative, expressed
OS09G0517200	Os09g0517200	LOC_Os09g34160	resistance protein, putative, expressed
OS09G0520700	Os09g0520700	LOC_Os09g34910	DEAD-box ATP-dependent RNA helicase 7, putative, expressed
OS09G0521800	Os09g0521800	LOC_Os09g34990	uncharacterized membrane protein, putative, expressed
OS09G0521900	Os09g0521900	LOC_Os09g35000	flap endonuclease, putative, expressed
OS09G0522800	Os09g0522800	LOC_Os09g35540	expressed protein
OS09G0523200	Os09g0523200	LOC_Os09g35560	expressed protein
OS09G0524500	OS09G0524500	NULL	NULL
OS09G0529100	Os09g0529100	LOC_Os09g35970	6-phosphogluconolactonase, putative, expressed
OS09G0532700	Os09g0532700	LOC_Os09g36240	deoxyribodipyrimidine photolyase family protein, expressed
OS09G0548066	Os09g0548034,Os09g0548066,Os09g0548100	LOC_Os09g37590	OsFBDUF47 - F-box and DUF domain containing protein, expressed
OS09G0549450	Os09g0549450	LOC_Os09g37710	NIN, putative, expressed
OS09G0550000	Os09g0550000	LOC_Os09g37760	bromodomain domain containing protein, expressed
OS09G0551400	Os09g0551400	LOC_Os09g37880	serine/threonine-protein kinase receptor precursor, putative, expressed
OS09G0551500	Os09g0551500	LOC_Os09g37890	serine/threonine-protein kinase receptor precursor, putative, expressed
OS09G0553200	Os09g0553200	LOC_Os09g38030	UTP--glucose-1-phosphate uridylyltransferase, putative, expressed
OS09G0556700	Os09g0556700	LOC_Os09g38440	ATXR, putative, expressed
OS09G0558600	Os09g0558600	LOC_Os09g38600	expressed protein
OS09G0558900	Os09g0558900	LOC_Os09g38620	NADPH reductase, putative, expressed
OS09G0559500	Os09g0559500	LOC_Os09g38660	expressed protein
OS09G0560000	Os09g0560000	LOC_Os09g38710	HEAT repeat family protein, putative, expressed
OS09G0561000	Os09g0561000	LOC_Os09g38800	OsWAK88 - OsWAK pseudogene, expressed
OS09G0561450	Os09g0561450	LOC_Os09g38834	OsWAK89b - OsWAK receptor-like protein kinase, expressed
OS09G0562400	Os09g0562400	LOC_Os09g38900	transposon protein, putative, unclassified, expressed
OS09G0562600	Os09g0562600	LOC_Os09g38910	OsWAK92 - OsWAK receptor-like protein kinase, expressed
OS09G0563200	Os09g0563200	LOC_Os09g38960	potassium transporter, putative, expressed
OS09G0564200	Os09g0564200	LOC_Os09g39070	thiol protease SEN102 precursor, putative, expressed
OS09G0567900	Os09g0567900	LOC_Os09g39440	inosine-uridine preferring nucleoside hydrolase family protein, putative, expressed
OS09G0568200	Os09g0568200	LOC_Os09g39490	histone-like transcription factor and archaeal histone, putative, expressed
OS09G0573150	OS09G0573150	NULL	NULL
OS10G0105400	Os10g0105400	LOC_Os10g01610	expressed protein
OS10G0111900	Os10g0111900	LOC_Os10g02276	OsWAK96 - OsWAK receptor-like protein kinase, expressed
OS10G0112600	Os10g0112600	LOC_Os10g02350	transmembrane 9 superfamily member, putative, expressed
OS10G0115550	Os10g0115550	LOC_Os10g02625	gibberellin regulated protein, putative, expressed
OS10G0116200	Os10g0116200	LOC_Os10g02670	expressed protein
OS10G0117400	Os10g0117400	LOC_Os10g02790	transposon protein, putative, Mariner sub-class, expressed
OS10G0124900	OS10G0124900	NULL	NULL
OS10G0125300	Os10g0125300,Os10g0125400	LOC_Os10g03660	OsFBX345 - F-box domain containing protein, expressed
OS10G0125700	OS10G0125700	NULL	NULL
OS10G0126100	Os10g0126100	LOC_Os10g03700	transposon protein, putative, CACTA, En/Spm sub-class, expressed
OS10G0126800	Os10g0126800	LOC_Os10g03760	OsFBX350 - F-box domain containing protein, expressed
OS10G0127900	Os10g0127900	LOC_Os10g03850	OsFBX352 - F-box domain containing protein, expressed
OS10G0130900	OS10G0130900	NULL	NULL
OS10G0133100	Os10g0133100	LOC_Os10g04370	OsFBX357 - F-box domain containing protein, expressed
OS10G0134700	Os10g0134700	LOC_Os10g04540	expressed protein
OS10G0136150	Os10g0136150	LOC_Os10g04690	expressed protein
OS10G0136500	Os10g0136500	LOC_Os10g04730	TKL_IRAK_DUF26-la.6 - DUF26 kinases have homology to DUF26 containing loci, expressed
OS10G0136625	OS10G0136625	NULL	NULL
OS10G0139600	Os10g0139600	LOC_Os10g05010	expressed protein
OS10G0141300	Os10g0141300	LOC_Os10g05170	OsWAK100 - OsWAK receptor-like cytoplasmic kinase OsWAK-RLCK, expressed
OS10G0141400	Os10g0141400	LOC_Os10g05180	26S proteasome regulatory subunit S5A, putative, expressed
OS10G0145000	Os10g0145000	LOC_Os10g05520	OsFBX371 - F-box domain containing protein, expressed
OS10G0147300	Os10g0147300	LOC_Os10g05680	expressed protein
OS10G0148100	Os10g0148100	LOC_Os10g05750	POEI3 - Pollen Ole e I allergen and extensin family protein precursor, expressed
OS10G0149700	Os10g0149700	LOC_Os10g05900	expressed protein
OS10G0151100	Os10g0151100	LOC_Os10g06030	OsWAK103 - OsWAK receptor-like protein kinase, expressed
OS10G0151500	Os10g0151500	LOC_Os10g06090	OsWAK104 - OsWAK receptor-like protein kinase, expressed
OS10G0154500	Os10g0154500	LOC_Os10g06580	cyclin-dependent kinase G-1, putative, expressed
OS10G0154600	Os10g0154600	LOC_Os10g06610	expressed protein
OS10G0155500	Os10g0155500	LOC_Os10g06720	aldose 1-epimerase, putative, expressed
OS10G0158400	Os10g0158400	LOC_Os10g07040	chalcone synthase, putative, expressed
OS10G0161100	OS10G0161100	NULL	NULL
OS10G0161400	Os10g0161400	LOC_Os10g07400	disease resistance RPP13-like protein 1, putative, expressed
OS10G0162840	Os10g0162836,Os10g0162840	LOC_Os10g07548	wall-associated receptor kinase-like 4 precursor, putative, expressed
OS10G0162842	OS10G0162842	NULL	NULL
OS10G0162856	Os10g0162856	LOC_Os10g07616	chalcone synthase, putative, expressed
OS10G0166600	Os10g0166600	LOC_Os10g08474	cytochrome P450, putative, expressed
OS10G0177400	Os10g0177400	LOC_Os10g09870	HVA22, putative, expressed
OS10G0178000	Os10g0178000	LOC_Os10g09920	LTPL132 - Protease inhibitor/seed storage/LTP family protein precursor, putative, expressed
OS10G0178101	OS10G0178101	NULL	NULL
OS10G0189001	OS10G0189001	NULL	NULL
OS10G0190500	Os10g0190500	LOC_Os10g11310	expressed protein
OS10G0191000	OS10G0191000	NULL	NULL
OS10G0196000	Os10g0196000	LOC_Os10g12050	expressed protein
OS10G0202200	Os10g0202200	LOC_Os10g13450	expressed protein
OS10G0202900	OS10G0202900	NULL	NULL
OS10G0324900	Os10g0324900	LOC_Os10g17770	chromo domain-containing protein LHP1, putative, expressed
OS10G0327201	OS10G0327201	NULL	NULL
OS10G0329300	Os10g0329300	LOC_Os10g18220	GHMP kinases ATP-binding protein, putative, expressed
OS10G0337400	Os10g0337400	LOC_Os10g19160	receptor kinase, putative, expressed
OS10G0337500	Os10g0337500	LOC_Os10g19180	zinc finger family protein, putative, expressed
OS10G0346600	Os10g0346600	LOC_Os10g20630	vacuolar-sorting receptor precursor, putative, expressed
OS10G0347800	Os10g0347800	LOC_Os10g20710	formin-like protein 6 precursor, putative, expressed
OS10G0348600	Os10g0348600	LOC_Os10g20770	expressed protein
OS10G0350450	Os10g0350200,Os10g0350400,Os10g0350450	LOC_Os10g20990	ribosomal protein S12 containing protein, expressed
OS10G0360900	Os10g0360900	LOC_Os10g21660	FAD binding protein, putative, expressed
OS10G0361300	Os10g0361300	LOC_Os10g21700	transposon protein, putative, CACTA, En/Spm sub-class, expressed
OS10G0370800	Os10g0370800	LOC_Os10g22570	cellulase, putative, expressed
OS10G0374600	Os10g0374600	LOC_Os10g22860	receptor kinase, putative, expressed
OS10G0375000	Os10g0375000	LOC_Os10g22890	receptor-like kinase, putative, expressed
OS10G0375200	OS10G0375200	NULL	NULL
OS10G0375600	Os10g0375600	LOC_Os10g22950	calmodulin-binding transcription activator, putative, expressed
OS10G0376200	Os10g0376200	LOC_Os10g22980	leucine rich repeat domain containing protein, putative, expressed
OS10G0388100	OS10G0388100	NULL	NULL
OS10G0390000	Os10g0390000	LOC_Os10g25100	expressed protein
OS10G0397200	Os10g0397200	LOC_Os10g25770	transcription initiation factor IIE subunit beta, putative, expressed
OS10G0399200	Os10g0399200	LOC_Os10g25950	cystathionine gamma-synthase, putative, expressed
OS10G0406600	Os10g0406600	LOC_Os10g26640	LYR motif containing protein, putative, expressed
OS10G0409400	Os10g0409400	LOC_Os10g26940	BURP domain containing protein, expressed
OS10G0409900	Os10g0409900	LOC_Os10g26990	OsFBK23 - F-box domain and kelch repeat containing protein, expressed
OS10G0413700	Os10g0413700	LOC_Os10g27360	no apical meristem protein, putative, expressed
OS10G0415200	Os10g0415200	LOC_Os10g27990	exocyst complex component 6, putative, expressed
OS10G0415400	Os10g0415400	LOC_Os10g28009	expressed protein
OS10G0418300	Os10g0418300	LOC_Os10g28254	expressed protein
OS10G0422075	Os10g0422000,Os10g0422075	LOC_Os10g28610	KIP1, putative, expressed
OS10G0425400	Os10g0425400	LOC_Os10g28970	BTB6 - Bric-a-Brac, Tramtrack, Broad Complex BTB domain, expressed
OS10G0427300	Os10g0427300	LOC_Os10g29180	MBTB47 - Bric-a-Brac, Tramtrack, Broad Complex BTB domain with Meprin and TRAF Homology MATH domain, expressed
OS10G0430200	Os10g0430200	LOC_Os10g29470	dehydrogenase, putative, expressed
OS10G0430600	Os10g0430600,Os10g0430700	LOC_Os10g29495	speckle-type POZ protein, putative, expressed
OS10G0430750	OS10G0430750	NULL	NULL
OS10G0437200	Os10g0437200	LOC_Os10g30100	3-5 exonuclease family protein, putative, expressed
OS10G0437600	Os10g0437600	LOC_Os10g30156	starch synthase, putative, expressed
OS10G0442100	Os10g0442100	LOC_Os10g30550	tRNA methyltransferase, putative, expressed
OS10G0445600	Os10g0445600	LOC_Os10g30870	expressed protein
OS10G0450400	Os10g0450400	LOC_Os10g31290	expressed protein
OS10G0462600	Os10g0462600	LOC_Os10g32520	expressed protein
OS10G0468500	Os10g0468500	LOC_Os10g33040	receptor-like protein kinase precursor, putative, expressed
OS10G0468800	Os10g0468800,Os10g0468875	LOC_Os10g33060	hcr2-5D, putative, expressed
OS10G0469000	Os10g0469000	LOC_Os10g33080	leucine-rich repeat receptor protein kinase EXS precursor, putative, expressed
OS10G0469100	Os10g0469100	LOC_Os10g33104	expressed protein
OS10G0473400	Os10g0473400	LOC_Os10g33420	non-lysosomal glucosylceramidase, putative, expressed
OS10G0479900	Os10g0479900	LOC_Os10g33940	auxin response factor 18, putative, expressed
OS10G0480900	Os10g0480900	LOC_Os10g33980	thiamine pyrophosphate enzyme, N-terminal TPP binding domain containing protein, expressed
OS10G0485600	Os10g0485600	LOC_Os10g34430	Dicer, putative, expressed
OS10G0486200	Os10g0486200	LOC_Os10g34490	phosphate translocator-related, putative, expressed
OS10G0487300	Os10g0487300	LOC_Os10g34580	FHA domain containing protein, putative, expressed
OS10G0488800	Os10g0488800	LOC_Os10g34710	myosin-2 heavy chain, non muscle, putative, expressed
OS10G0489900	Os10g0489900	LOC_Os10g34820	CDT1B - Putative DNA replication initiation protein, expressed
OS10G0490400	Os10g0490400	LOC_Os10g34884	RIPER7 - Ripening-related family protein precursor, expressed
OS10G0492300	Os10g0492300	LOC_Os10g35030	IAP100, putative, expressed
OS10G0493100	Os10g0493100	LOC_Os10g35090	Rf1, mitochondrial precursor, putative, expressed
OS10G0494950	Os10g0494950	LOC_Os10g35210	expressed protein
OS10G0495416	OS10G0495416	NULL	NULL
OS10G0495500	Os10g0495500	LOC_Os10g35280	nucleolar complex protein 2, putative, expressed
OS10G0497300	Os10g0497300	LOC_Os10g35436	Rf1, mitochondrial precursor, putative, expressed
OS10G0497366	OS10G0497366	NULL	NULL
OS10G0498900	Os10g0498900	LOC_Os10g35580	ATEB1A-like microtubule associated protein, putative, expressed
OS10G0506000	Os10g0506000	LOC_Os10g36190	PPR repeat domain containing protein, putative, expressed
OS10G0506200	Os10g0506200	LOC_Os10g36210	valyl-tRNA synthetase, putative, expressed
OS10G0506800	Os10g0506800	LOC_Os10g36250	tetratricopeptide repeat, putative, expressed
OS10G0507150	Os10g0507150	LOC_Os10g36280	Leucine Rich Repeat family protein, expressed
OS10G0508300	Os10g0508300	LOC_Os10g36420	YABBY domain containing protein, putative, expressed
OS10G0512800	Os10g0512800	LOC_Os10g36880	kinesin motor domain containing protein, putative, expressed
OS10G0514500	Os10g0514500	LOC_Os10g37050	transposon protein, putative, unclassified, expressed
OS10G0514550	OS10G0514550	NULL	NULL
OS10G0524600	Os10g0524600	LOC_Os10g38080	OsSub61 - Putative Subtilisin homologue, expressed
OS10G0527900	Os10g0527900	LOC_Os10g38450	receptor-like protein kinase 2 precursor, putative, expressed
OS10G0533150	Os10g0533150	LOC_Os10g38920	protein kinase domain containing protein, expressed
OS10G0535575	Os10g0535575	LOC_Os10g39084	expressed protein
OS10G0546600	Os10g0546600	LOC_Os10g39930	cytochrome P450 97B2, putative, expressed
OS10G0549700	Os10g0549700	LOC_Os10g40230	expressed protein
OS10G0550400	Os10g0550400	LOC_Os10g40280	expressed protein
OS10G0550775	Os10g0550700,Os10g0550750,Os10g0550775	LOC_Os10g40324	expressed protein
OS10G0552300	Os10g0552300	LOC_Os10g40480	LTPL143 - Protease inhibitor/seed storage/LTP family protein precursor, expressed
OS10G0568300	Os10g0568300	LOC_Os10g41870	expressed protein
OS10G0568600	Os10g0568600	LOC_Os10g41900	mla1, putative, expressed
OS10G0569600	Os10g0569500,Os10g0569600	LOC_Os10g41999	RALFL27 - Rapid ALkalinization Factor RALF family protein precursor, expressed
OS10G0571100	Os10g0571100	LOC_Os10g42090	AGAP003819-PA, putative, expressed
OS10G0571900	Os10g0571900	LOC_Os10g42160	transposon protein, putative, unclassified, expressed
OS10G0572500	Os10g0572400,Os10g0572500	LOC_Os10g42196	expressed protein
OS11G0102900	Os11g0102900	LOC_Os11g01200	senescence-induced receptor-like serine/threonine-protein kinase precursor, putative, expressed
OS11G0104240	Os11g0104220,Os11g0104240,Os11g0104260	LOC_Os11g01320	expressed protein
OS11G0106000	OS11G0106000	NULL	NULL
OS11G0106083	OS11G0106083	NULL	NULL
OS11G0109200	Os11g0109200,Os11g0109301	LOC_Os11g01810	DNA methyltransferase protein, putative, expressed
OS11G0117500	Os11g0117500	LOC_Os11g02530	WRKY40, expressed
OS11G0117900	Os11g0117900	LOC_Os11g02570	esterase, putative, expressed
OS11G0118300	Os11g0118300	LOC_Os11g02610	BTBN20 - Bric-a-Brac, Tramtrack, Broad Complex BTB domain with non-phototropic hypocotyl 3 NPH3 and coiled-coil domains, expressed
OS11G0118350	OS11G0118350	NULL	NULL
OS11G0118400	OS11G0118400	NULL	NULL
OS11G0118500	Os11g0118500	LOC_Os11g02620	BTBN21 - Bric-a-Brac, Tramtrack, Broad Complex BTB domain with non-phototropic hypocotyl 3 NPH3 and coiled-coil domains, expressed
OS11G0118800	Os11g0118800	LOC_Os11g02640	expressed protein
OS11G0121500	Os11g0121500,Os11g0121600	LOC_Os11g02840	protein kinase, putative, expressed
OS11G0123033	OS11G0123033	NULL	NULL
OS11G0126800	Os11g0126800	LOC_Os11g03290	nucleoside-triphosphatase, putative, expressed
OS11G0129800	Os11g0129800	LOC_Os11g03550	expressed protein
OS11G0131900	Os11g0131900	LOC_Os11g03730	alpha-N-arabinofuranosidase A, putative, expressed
OS11G0132600	Os11g0132600	LOC_Os11g03780	alpha-N-arabinofuranosidase, putative, expressed
OS11G0134600	Os11g0134600	LOC_Os11g04000	expressed protein
OS11G0138400	Os11g0138400	LOC_Os11g04300	retrotransposon protein, putative, unclassified, expressed
OS11G0138900	Os11g0138900	LOC_Os11g04350	cell death associated protein, putative, expressed
OS11G0141333	Os11g0141333	LOC_Os11g04540	sulfotransferase domain containing protein, expressed
OS11G0145200	Os11g0145200	LOC_Os11g04860	anthocyanin 5-O-glucosyltransferase, putative, expressed
OS11G0147100	Os11g0147100	LOC_Os11g04990	expressed protein
OS11G0148500	Os11g0148500	LOC_Os11g05110	pyruvate kinase, putative, expressed
OS11G0151700	Os11g0151700	LOC_Os11g05400	Ser/Thr protein phosphatase family protein, putative, expressed
OS11G0153400	Os11g0153400	LOC_Os11g05540	rhoGAP domain containing protein, expressed
OS11G0153700	Os11g0153700	LOC_Os11g05556	signal recognition particle 54 kDa protein, putative, expressed
OS11G0168300	Os11g0168300	LOC_Os11g06760	protein of unknown function domain containing protein, expressed
OS11G0168600	Os11g0168600	LOC_Os11g06780	serine/threonine-protein kinase BRI1-like 1 precursor, putative, expressed
OS11G0170200	Os11g0170200	LOC_Os11g06910	myosin heavy chain-related, putative, expressed
OS11G0170300	Os11g0170300	LOC_Os11g06930	CBS domain-containing protein, putative, expressed
OS11G0172150	Os11g0172150,Os11g0172133	LOC_Os11g07100	receptor-like protein kinase precursor, putative, expressed
OS11G0173432	Os11g0173432	LOC_Os11g07225	expressed protein
OS11G0176000	Os11g0176000	LOC_Os11g07480	WD domain, G-beta repeat domain containing protein, expressed
OS11G0181900	Os11g0181900	LOC_Os11g07940	expressed protein
OS11G0182900	Os11g0182900	LOC_Os11g08020	ankyrin repeat family protein, putative, expressed
OS11G0183700	Os11g0183700	LOC_Os11g08080	SWIRM domain containing protein, expressed
OS11G0184300	Os11g0184300	LOC_Os11g08120	Os11bglu37 - GH1 pseudogene, expressed
OS11G0184600	Os11g0184600	LOC_Os11g08180	aspartic proteinase Asp1 precursor, putative, expressed
OS11G0186600	Os11g0186600	LOC_Os11g08350	expressed protein
OS11G0191400	Os11g0191400	LOC_Os11g08670	NAD kinase, putative, expressed
OS11G0192500	Os11g0192500	LOC_Os11g08760	pectinesterase family protein, expressed
OS11G0200950	Os11g0200950	LOC_Os11g09460	expressed protein
OS11G0208000	Os11g0208000	LOC_Os11g10180	OsFBX412 - F-box domain containing protein, expressed
OS11G0208700	Os11g0208700	LOC_Os11g10280	receptor-like protein kinase, putative, expressed
OS11G0208750	OS11G0208750	NULL	NULL
OS11G0208800	Os11g0208800	LOC_Os11g10290	S-domain receptor-like protein kinase, putative, expressed
OS11G0209600	Os11g0209600	LOC_Os11g10400	OsFBX419 - F-box domain containing protein, expressed
OS11G0210000	Os11g0210000	LOC_Os11g10434	expressed protein
OS11G0212300	Os11g0212300	LOC_Os11g10640	protein kinase domain containing protein, expressed
OS11G0213700	Os11g0213700	LOC_Os11g10760	NBS-LRR disease resistance protein, putative, expressed
OS11G0222560	OS11G0222560	NULL	NULL
OS11G0224800	Os11g0224800	LOC_Os11g11760	serpin domain containing protein, putative, expressed
OS11G0225000	Os11g0225000	LOC_Os11g11780	cysteine-rich receptor-like protein kinase 21 precursor, putative, expressed
OS11G0226933	Os11g0226933	LOC_Os11g11960	disease resistance protein RPM1, putative, expressed
OS11G0227100	Os11g0227100	LOC_Os11g11990	NB-ARC domain containing protein, expressed
OS11G0229300	Os11g0229300	LOC_Os11g12300	NBS-LRR disease resistance protein, putative, expressed
OS11G0229700	Os11g0229700	LOC_Os11g12350	disease resistance protein, putative, expressed
OS11G0237900	Os11g0237900	LOC_Os11g13430	RGH1A, putative, expressed
OS11G0238000	Os11g0238000	LOC_Os11g13440	RGH1A, putative, expressed
OS11G0252400	Os11g0252400	LOC_Os11g14570	expressed protein
OS11G0255800	Os11g0255800	LOC_Os11g14930	expressed protein
OS11G0257800	OS11G0257800	NULL	NULL
OS11G0264000	Os11g0264000	LOC_Os11g16260	laccase precursor protein, putative, expressed
OS11G0275200	Os11g0275200	LOC_Os11g17504	retrotransposon protein, putative, Ty1-copia subclass, expressed
OS11G0282700	Os11g0282700	LOC_Os11g17954	transposon protein, putative, Pong sub-class, expressed
OS11G0307600	Os11g0307600	LOC_Os11g20239	expressed protein
OS11G0431100	Os11g0431100	LOC_Os11g24290	OsSCP51 - Putative Serine Carboxypeptidase homologue, expressed
OS11G0438400	Os11g0438400	LOC_Os11g25130	expressed protein
OS11G0439600	Os11g0439600	LOC_Os11g25260	nucleoside-triphosphatase, putative, expressed
OS11G0444000	Os11g0444000	LOC_Os11g25720	cytokinin-N-glucosyltransferase 1, putative, expressed
OS11G0451051	OS11G0451051	NULL	NULL
OS11G0456050	OS11G0456050	NULL	NULL
OS11G0479100	Os11g0479100	LOC_Os11g28950	pollen signalling protein with adenylyl cyclase activity, putative, expressed
OS11G0481150	Os11g0481150	LOC_Os11g29110	Leucine Rich Repeat family protein, expressed
OS11G0481600	Os11g0481600	LOC_Os11g29150	expressed protein
OS11G0485200	Os11g0485200	LOC_Os11g29490	plasma membrane ATPase, putative, expressed
OS11G0490200	Os11g0490200	LOC_Os11g29790	receptor kinase, putative, expressed
OS11G0490600	Os11g0490600	LOC_Os11g29840	expressed protein
OS11G0491400	Os11g0491400	LOC_Os11g29900	expressed protein
OS11G0492100	Os11g0491850,Os11g0492100	LOC_Os11g29970	NB-ARC domain containing protein, expressed
OS11G0493000	Os11g0493000	LOC_Os11g30060	NBS-LRR type disease resistance protein Hom-B, putative, expressed
OS11G0493700	Os11g0491600,Os11g0493700	LOC_Os11g29920	NB-ARC domain containing protein, expressed
OS11G0494100	Os11g0494100	LOC_Os11g30210	NBS-LRR type disease resistance protein, putative, expressed
OS11G0496600	Os11g0496600	LOC_Os11g30370	OsSPL19 - SBP-box gene family member, expressed
OS11G0504900	Os11g0504900	LOC_Os11g30830	expressed protein
OS11G0512600	Os11g0512600	LOC_Os11g31380	no apical meristem protein, putative, expressed
OS11G0513900	Os11g0513900	LOC_Os11g31470	expressed protein
OS11G0517350	OS11G0517350	NULL	NULL
OS11G0525200	Os11g0525200	LOC_Os11g32240	cytochrome P450 51, putative, expressed
OS11G0528700	Os11g0528700	LOC_Os11g32510	OsGH3-13 - Auxin-responsive GH3 gene family member, expressed
OS11G0532751	Os11g0532751	LOC_Os11g32820	expressed protein
OS11G0539000	Os11g0539000	LOC_Os11g33250	expressed protein
OS11G0539600	Os11g0539600	LOC_Os11g33310	OsFBX424 - F-box domain containing protein, expressed
OS11G0539901	OS11G0539901	NULL	NULL
OS11G0540000	OS11G0540000	NULL	NULL
OS11G0540600	Os11g0540600	LOC_Os11g33394	plant protein of unknown function domain containing protein, expressed
OS11G0542100	Os11g0542100	LOC_Os11g34020	protein binding protein, putative, expressed
OS11G0550100	Os11g0550100	LOC_Os11g34880	NB-ARC domain containing protein, expressed
OS11G0550500	Os11g0550500	LOC_Os11g34920	stripe rust resistance protein Yr10, putative, expressed
OS11G0553500	Os11g0553500	LOC_Os11g35120	OsWAK116 - OsWAK receptor-like cytoplasmic kinase OsWAK-RLCK, expressed
OS11G0555300	Os11g0555300	LOC_Os11g35210	NB-ARC domain containing protein, expressed
OS11G0558900	Os11g0558900	LOC_Os11g35450	leucine-rich repeat receptor protein kinase EXS precursor, putative, expressed
OS11G0559200	Os11g0559200	LOC_Os11g35500	receptor-like protein kinase 5 precursor, putative, expressed
OS11G0559600	Os11g0559600	LOC_Os11g35540	expressed protein
OS11G0565920	Os11g0565920	LOC_Os11g35890	leucine rich repeat protein, putative, expressed
OS11G0567200	OS11G0567200	NULL	NULL
OS11G0569300	Os11g0569300	LOC_Os11g36140	receptor-like protein kinase 2 precursor, putative, expressed
OS11G0569500	Os11g0569500	LOC_Os11g36150	receptor-like protein kinase 2 precursor, putative, expressed
OS11G0569600	Os11g0569600	LOC_Os11g36160	receptor-like protein kinase 2 precursor, putative, expressed
OS11G0569733	Os11g0569733	LOC_Os11g36180	receptor kinase, putative, expressed
OS11G0571900	Os11g0571900	LOC_Os11g36340	lymphoid organ expressed yellow head virus receptor protein, putative, expressed
OS11G0573100	OS11G0573100	NULL	NULL
OS11G0578066	OS11G0578066	NULL	NULL
OS11G0578100	Os11g0578100	LOC_Os11g36960	dnaJ domain containing protein, expressed
OS11G0578500	Os11g0578500	LOC_Os11g37000	heat shock protein DnaJ, putative, expressed
OS11G0579600	Os11g0579600	LOC_Os11g37060	OsFBDUF52 - F-box and DUF domain containing protein, expressed
OS11G0579900	Os11g0579900	LOC_Os11g37090	pumilio-family RNA binding repeat domain containing protein, expressed
OS11G0580000	Os11g0580000	LOC_Os11g37100	expressed protein
OS11G0580500	Os11g0580500	LOC_Os11g37120	nucleolar protein 5, putative, expressed
OS11G0582300	Os11g0582300	LOC_Os11g37260	SEY1, putative, expressed
OS11G0582700	Os11g0582700	LOC_Os11g37300	OsFBDUF53 - F-box and DUF domain containing protein, expressed
OS11G0588400	Os11g0588400	LOC_Os11g37740	stripe rust resistance protein Yr10, putative, expressed
OS11G0589800	Os11g0589800	LOC_Os11g37790	mla, putative, expressed
OS11G0591100	Os11g0591100	LOC_Os11g37890	NAD dependent epimerase/dehydratase family protein, putative, expressed
OS11G0593100	Os11g0593100	LOC_Os11g38070	expressed protein
OS11G0593700	Os11g0593700	LOC_Os11g38140	OsFBDUF58 - F-box and DUF domain containing protein, expressed
OS11G0595200	Os11g0595200	LOC_Os11g38260	PAP fibrillin family domain containing protein, expressed
OS11G0598500	Os11g0598500	LOC_Os11g38580	NBS-LRR type disease resistance protein, putative, expressed
OS11G0599000	Os11g0599000	LOC_Os11g38630	expressed protein
OS11G0606500	Os11g0606500	LOC_Os11g39320	LZ-NBS-LRR class, putative, expressed
OS11G0606900	OS11G0606900	NULL	NULL
OS11G0609600	Os11g0609600	LOC_Os11g39540	14-3-3 protein, putative, expressed
OS11G0611600	OS11G0611600	NULL	NULL
OS11G0620400	Os11g0620400	LOC_Os11g40540	transporter family protein, putative, expressed
OS11G0620450	OS11G0620450	NULL	NULL
OS11G0621300	Os11g0621300	LOC_Os11g40590	DUF1399 containing protein, putative, expressed
OS11G0622200	Os11g0622200	LOC_Os11g40674	expressed protein
OS11G0628000	Os11g0628000	LOC_Os11g41100	expressed protein
OS11G0629600	Os11g0629600	LOC_Os11g41170	disease resistance protein RPM1, putative, expressed
OS11G0637600	Os11g0637600	LOC_Os11g41880	potyvirus VPg interacting protein, putative, expressed
OS11G0638700	OS11G0638700	NULL	NULL
OS11G0639600	Os11g0639600	LOC_Os11g42040	non-TIR-NBS-LRR type resistance protein, putative, expressed
OS11G0640000	Os11g0640000	LOC_Os11g42060	Leucine Rich Repeat family protein, expressed
OS11G0640300	Os11g0640300	LOC_Os11g42070	Leucine Rich Repeat family protein, expressed
OS11G0642100	Os11g0642100	LOC_Os11g42270	OsFBX432 - F-box domain containing protein, expressed
OS11G0642400	Os11g0642400	LOC_Os11g42290	transferase family protein, putative, expressed
OS11G0642900	OS11G0642900	NULL	NULL
OS11G0643600	Os11g0643600	LOC_Os11g42410	expressed protein
OS11G0645800	Os11g0645800	LOC_Os11g42580	Leucine Rich Repeat family protein, expressed
OS11G0648700	Os11g0648700	LOC_Os11g42880	expressed protein
OS11G0648800	Os11g0648800	LOC_Os11g42890	expressed protein
OS11G0649000	Os11g0649000	LOC_Os11g42900	expressed protein
OS11G0650500	Os11g0650500	LOC_Os11g43030	von Willebrand factor type A domain containing protein, expressed
OS11G0650600	Os11g0650600	LOC_Os11g43040	retrotransposon protein, putative, unclassified, expressed
OS11G0654800	Os11g0654800	LOC_Os11g43390	expressed protein
OS11G0657900	Os11g0657900	LOC_Os11g43700	RGH1A, putative, expressed
OS11G0660700	Os11g0660700	LOC_Os11g43914	expressed protein
OS11G0664100	Os11g0664100,Os11g0664133	LOC_Os11g44260	expressed protein
OS11G0664800	Os11g0664800	LOC_Os11g44340	calmodulin binding protein, putative, expressed
OS11G0666200	Os11g0666200	LOC_Os11g44430	protein kinase, putative, expressed
OS11G0667000	Os11g0667000	LOC_Os11g44500	protein kinase domain containing protein, expressed
OS11G0668100	Os11g0668100	LOC_Os11g44580	go35 NBS-LRR, putative, expressed
OS11G0668300	Os11g0668300	LOC_Os11g44600	calmodulin binding protein, putative, expressed
OS11G0669100	Os11g0669100	LOC_Os11g44680	calmodulin binding protein, putative, expressed
OS11G0673600	Os11g0673600	LOC_Os11g44960	NBS-LRR disease resistance protein, putative, expressed
OS11G0673900	Os11g0673900	LOC_Os11g44970	NBS-LRR disease resistance protein, putative, expressed
OS11G0674400	Os11g0674400	LOC_Os11g45050	NBS-LRR disease resistance protein, putative, expressed
OS11G0676200	Os11g0676100,Os11g0676200	LOC_Os11g44990	NB-ARC domain containing protein, expressed
OS11G0676800	Os11g0676800	LOC_Os11g45160	disease resistance protein, putative, expressed
OS11G0677000	Os11g0677000	LOC_Os11g45180	NBS-LRR disease resistance protein, putative, expressed
OS11G0684100	Os11g0684100	LOC_Os11g45750	WRKY125, expressed
OS11G0686100	Os11g0686100	LOC_Os11g45890	expressed protein
OS11G0686400	Os11g0686400	LOC_Os11g45924	WRKY41, expressed
OS11G0686900	Os11g0686900	LOC_Os11g45970	NBS-LRR disease resistance protein, putative, expressed
OS11G0689100	Os11g0689100	LOC_Os11g46210	NB-ARC domain containing protein, expressed
OS11G0691300	Os11g0691290,Os11g0691300	LOC_Os11g46880	protein kinase domain containing protein, expressed
OS11G0695000	Os11g0695000	LOC_Os11g47240	leucine-rich repeat receptor protein kinase EXS precursor, putative, expressed
OS11G0696400	Os11g0696400	LOC_Os11g47350	beta-D-xylosidase, putative, expressed
OS11G0696501	OS11G0696501	NULL	NULL
OS11G0700100	Os11g0700100	LOC_Os11g47447	stripe rust resistance protein Yr10, putative, expressed
OS11G0701200	Os11g0701200	LOC_Os11g47530	glycosyl hydrolase, putative, expressed
OS11G0701400	Os11g0701400	LOC_Os11g47550	glycosyl hydrolase, putative, expressed
OS11G0703900	Os11g0703900	LOC_Os11g47760	DnaK family protein, putative, expressed
OS11G0704100	Os11g0704100	LOC_Os11g47780	pollen signalling protein with adenylyl cyclase activity, putative, expressed
OS12G0102500	Os12g0102500	LOC_Os12g01200	senescence-induced receptor-like serine/threonine-protein kinase precursor, putative, expressed
OS12G0105500	Os12g0105500	LOC_Os12g01480	phosphatidate cytidylyltransferase, putative, expressed
OS12G0108966	OS12G0108966	NULL	NULL
OS12G0114000	Os12g0114000	LOC_Os12g02240	expressed protein
OS12G0116200	OS12G0116200	NULL	NULL
OS12G0116600	Os12g0116600	LOC_Os12g02440	WRKY95, expressed
OS12G0117300	Os12g0117300	LOC_Os12g02520	OsMan09 - Endo-Beta-Mannanase, expressed
OS12G0118800	Os12g0118800	LOC_Os12g02660	expressed protein
OS12G0119700	Os12g0119700	LOC_Os12g02690	expressed protein
OS12G0119800	Os12g0119800	LOC_Os12g02700	harpin-induced protein 1 domain containing protein, expressed
OS12G0126300	Os12g0126300	LOC_Os12g03290	AP2 domain containing protein, expressed
OS12G0127600	OS12G0127600	NULL	NULL
OS12G0128450	OS12G0128450	NULL	NULL
OS12G0128700	Os12g0128700	LOC_Os12g03470	alpha-N-arabinofuranosidase A, putative, expressed
OS12G0130200	Os12g0130200	LOC_Os12g03640	S-locus-like receptor protein kinase, putative, expressed
OS12G0130500	Os12g0130500	LOC_Os12g03670	D-mannose binding lectin family protein, expressed
OS12G0131701	Os12g0131500,Os12g0131701	LOC_Os12g03750	Leucine Rich Repeat family protein, expressed
OS12G0136300	OS12G0136300	NULL	NULL
OS12G0140000	Os12g0140000	LOC_Os12g04570	expressed protein
OS12G0144700	OS12G0144700	NULL	NULL
OS12G0146000	Os12g0146000	LOC_Os12g05130	expressed protein
OS12G0146500	Os12g0146500	LOC_Os12g05180	avr9/Cf-9 rapidly elicited protein, putative, expressed
OS12G0148400	Os12g0148301,Os12g0148400	LOC_Os12g05310	retrotransposon protein, putative, unclassified, expressed
OS12G0154700	Os12g0154700	LOC_Os12g05840	Cupin domain containing protein, expressed
OS12G0165900	Os12g0165900	LOC_Os12g06870	OsNucAP2 - Putative Nucleoporin Autopeptidase homologue, expressed
OS12G0169100	Os12g0169100	LOC_Os12g07160	plant protein of unknown function DUF869 domain containing protein, expressed
OS12G0171500	OS12G0171500	NULL	NULL
OS12G0181600	Os12g0181600	LOC_Os12g08130	amino acid transporter, putative, expressed
OS12G0181701	OS12G0181701	NULL	NULL
OS12G0189100	OS12G0189100	NULL	NULL
OS12G0191150	OS12G0191150	NULL	NULL
OS12G0192500	Os12g0192500	LOC_Os12g09000	phosphomethylpyrimidine kinase/thiamin-phosphate pyrophosphorylase, putative, expressed
OS12G0197200	Os12g0197200	LOC_Os12g09550	expressed protein
OS12G0197500	Os12g0197500	LOC_Os12g09580	leafbladeless1, putative, expressed
OS12G0197700	Os12g0197700	LOC_Os12g09590	leafbladeless1, putative, expressed
OS12G0198500	Os12g0198500	LOC_Os12g09670	expressed protein
OS12G0198900	Os12g0198900	LOC_Os12g09710	NBS-LRR disease resistance protein, putative, expressed
OS12G0204100	Os12g0204100	LOC_Os12g10280	aquaporin protein, putative, expressed
OS12G0204600	Os12g0204600	LOC_Os12g10330	NB-ARC domain containing protein, expressed
OS12G0207000	Os12g0207000	LOC_Os12g10540	OsMADS13 - MADS-box family gene with MIKCc type-box, expressed
OS12G0207200	Os12g0207200	LOC_Os12g10550	transposon protein, putative, CACTA, En/Spm sub-class, expressed
[truncated: 91 more rows]
