# Supplementary material for: Comparative Genomic Analysis of Rice with Contrasting Photosynthesis and Grain Production under Salt Stress
Source: Genes (Basel). 2019 Jul 25;10(8):562. doi: 10.3390/genes10080562 (PMC6722916; doi:10.3390/genes10080562)
Supplement: Supplementary file 1 [file genes-10-00562-s001.zip › All Supplementary Files/Table_S7.xlsx]

## Sheet: Sheet1
Table S7 Summary of gene ontology enrichment analysis
Term	Type	Description	Count	%	PValue	Genes	ListTotal	PopHits	PopTotal	FoldChange	Bonferroni	Benjamini	FDR
GO:0006915	GOTERM_BP	apoptotic process	90	5.78035	1.26632e-24	OS01G0112800,OS01G0520600,OS01G0781200,OS02G0282000,OS03G0422900,OS03G0566700,OS03G0599000,OS03G0848700,OS04G0111100,OS04G0325300,OS04G0378575,OS04G0620950,OS04G0623066,OS05G0250700,OS05G0365300,OS05G0414300,OS05G0479800,OS05G0492600,OS06G0146100,OS06G0146250,OS06G0268500,OS06G0276300,OS06G0287000,OS06G0524900,OS06G0619000,OS06G0644466,OS06G0693100,OS07G0116800,OS07G0116900,OS07G0117000,OS07G0117…	1557	469	32072	3.95282	5.60981e-22	1.24761e-21	1.86994e-22
GO:0006952	GOTERM_BP	defense response	99	6.35838	2.80792e-21	OS01G0112800,OS01G0520600,OS01G0603800,OS01G0754200,OS01G0781200,OS01G0810800,OS01G0937300,OS02G0155400,OS02G0282000,OS03G0129100,OS03G0262300,OS03G0422900,OS03G0566700,OS03G0599000,OS03G0653900,OS03G0687700,OS03G0848700,OS04G0107900,OS04G0111100,OS04G0178400,OS04G0325300,OS04G0378575,OS04G0401900,OS04G0611700,OS04G0620950,OS04G0623066,OS05G0212200,OS05G0250700,OS05G0365300,OS05G0414300,OS05G0479…	1557	633	32072	3.22158	1.24391e-18	1.38321e-18	2.07318e-19
GO:0006468	GOTERM_BP	protein phosphorylation	156	10.0193	2.42936e-18	OS01G0113700,OS01G0113800,OS01G0114100,OS01G0114700,OS01G0115600,OS01G0116300,OS01G0117500,OS01G0136800,OS01G0136900,OS01G0137250,OS01G0152600,OS01G0227200,OS01G0327600,OS01G0364400,OS01G0541900,OS01G0670100,OS01G0689900,OS01G0690800,OS01G0711200,OS01G0742400,OS01G0744300,OS01G0759200,OS01G0810500,OS01G0810600,OS01G0810800,OS01G0852200,OS02G0153200,OS02G0153700,OS02G0214900,OS02G0227700,OS02G0228…	1557	1451	32072	2.2146	1.07621e-15	7.18036e-16	1.07621e-16
GO:0031047	GOTERM_BP	gene silencing by RNA	13	0.834939	0.00206768	OS01G0147400,OS02G0523500,OS02G0736200,OS03G0347200,OS03G0789500,OS03G0800200,OS04G0488100,OS05G0153200,OS07G0413700,OS07G0476200,OS07G0517400,OS12G0197500,OS12G0197700	1557	87	32072	3.07795	0.915982	0.244454	0.0366393
GO:0016301	GOTERM_MF	kinase activity	222	14.2582	4.79544e-24	OS01G0113700,OS01G0113800,OS01G0114100,OS01G0114700,OS01G0115600,OS01G0116300,OS01G0117000,OS01G0117500,OS01G0136800,OS01G0136900,OS01G0137400,OS01G0137250,OS01G0137282,OS01G0137500,OS01G0152600,OS01G0160700,OS01G0161300,OS01G0162200,OS01G0227200,OS01G0327600,OS01G0364400,OS01G0541900,OS01G0670100,OS01G0689900,OS01G0690800,OS01G0711200,OS01G0742400,OS01G0744300,OS01G0759200,OS01G0782200,OS01G0810…	1557	2152	32072	2.12495	2.12438e-21	3.54342e-21	5.31095e-22
GO:0043531	GOTERM_MF	ADP binding	87	5.58767	2.124e-23	OS01G0112800,OS01G0520600,OS01G0781200,OS01G0937300,OS02G0282000,OS02G0818500,OS03G0422900,OS03G0566700,OS03G0599000,OS03G0848700,OS04G0111100,OS04G0325300,OS04G0378575,OS04G0620950,OS04G0623066,OS05G0250700,OS05G0365300,OS05G0414300,OS05G0479800,OS06G0146100,OS06G0146250,OS06G0268500,OS06G0276300,OS06G0287000,OS06G0524900,OS06G0619000,OS06G0644466,OS06G0693100,OS07G0116800,OS07G0116900,OS07G0117…	1557	461	32072	3.88737	9.40933e-21	1.25557e-20	1.88187e-21
GO:0004713	GOTERM_MF	protein tyrosine kinase activity	149	9.56969	2.12745e-19	OS01G0113700,OS01G0113800,OS01G0114100,OS01G0114700,OS01G0115600,OS01G0116300,OS01G0117500,OS01G0136800,OS01G0136900,OS01G0137250,OS01G0152600,OS01G0227200,OS01G0327600,OS01G0364400,OS01G0541900,OS01G0670100,OS01G0689900,OS01G0690800,OS01G0711200,OS01G0742400,OS01G0759200,OS01G0810500,OS01G0810600,OS01G0810800,OS02G0153200,OS02G0153700,OS02G0227700,OS02G0228300,OS02G0553000,OS02G0602100,OS02G0632…	1557	1314	32072	2.33576	9.42458e-17	7.86e-17	1.17807e-17
GO:0004672	GOTERM_MF	protein kinase activity	155	9.95504	8.49741e-19	OS01G0113700,OS01G0113800,OS01G0114100,OS01G0114700,OS01G0115600,OS01G0116300,OS01G0117500,OS01G0136800,OS01G0136900,OS01G0137250,OS01G0152600,OS01G0227200,OS01G0327600,OS01G0364400,OS01G0541900,OS01G0670100,OS01G0689900,OS01G0690800,OS01G0711200,OS01G0742400,OS01G0744300,OS01G0759200,OS01G0810500,OS01G0810600,OS01G0810800,OS01G0852200,OS02G0153200,OS02G0153700,OS02G0214900,OS02G0227700,OS02G0228…	1557	1419	32072	2.25002	3.76435e-16	2.79061e-16	4.18262e-17
GO:0004674	GOTERM_MF	protein serine/threonine kinase activity	151	9.69814	3.75503e-18	OS01G0113700,OS01G0113800,OS01G0114100,OS01G0114700,OS01G0115600,OS01G0116300,OS01G0117500,OS01G0136800,OS01G0136900,OS01G0137250,OS01G0152600,OS01G0227200,OS01G0327600,OS01G0364400,OS01G0541900,OS01G0670100,OS01G0689900,OS01G0690800,OS01G0711200,OS01G0742400,OS01G0744300,OS01G0759200,OS01G0810500,OS01G0810600,OS01G0810800,OS01G0852200,OS02G0153200,OS02G0153700,OS02G0214900,OS02G0227700,OS02G0228…	1557	1389	32072	2.2393	1.66348e-15	1.00896e-15	1.51225e-16
GO:0016772	GOTERM_MF	transferase activity, transferring phosphorus-containing groups	153	9.82659	2.74012e-17	OS01G0113800,OS01G0114100,OS01G0114700,OS01G0115600,OS01G0116300,OS01G0117500,OS01G0136800,OS01G0136900,OS01G0137250,OS01G0152600,OS01G0227200,OS01G0311500,OS01G0327600,OS01G0364400,OS01G0541900,OS01G0670100,OS01G0689900,OS01G0690800,OS01G0711200,OS01G0742400,OS01G0744300,OS01G0759200,OS01G0810500,OS01G0810600,OS01G0810800,OS01G0852200,OS02G0153200,OS02G0153700,OS02G0214900,OS02G0227700,OS02G0228…	1557	1452	32072	2.17051	1.21387e-14	6.74904e-15	1.01156e-15
GO:0030247	GOTERM_MF	polysaccharide binding	23	1.4772	4.82046e-08	OS01G0136800,OS01G0136900,OS01G0137400,OS01G0137250,OS01G0364400,OS01G0689900,OS01G0690800,OS02G0632800,OS03G0841100,OS04G0275100,OS04G0307500,OS04G0368000,OS04G0368300,OS04G0368800,OS04G0598900,OS06G0170100,OS09G0471200,OS09G0561000,OS09G0561450,OS09G0562600,OS10G0111900,OS10G0151100,OS10G0151500	1557	101	32072	4.69077	2.13547e-05	8.38096e-06	1.25616e-06
GO:0004872	GOTERM_MF	receptor activity	58	3.72511	7.85157e-07	OS01G0114700,OS01G0115600,OS01G0136800,OS01G0136900,OS01G0137250,OS01G0227200,OS01G0356800,OS01G0689900,OS01G0690800,OS01G0711200,OS01G0810800,OS01G0836700,OS01G0925300,OS02G0153100,OS02G0153200,OS02G0153500,OS02G0153700,OS02G0155400,OS02G0156200,OS02G0156633,OS02G0157200,OS02G0227700,OS02G0228300,OS02G0787600,OS03G0422800,OS03G0637600,OS04G0457800,OS04G0672100,OS05G0486100,OS06G0167500,OS06G0551…	1557	563	32072	2.12206	0.000347825	0.000128925	1.93236e-05
GO:0017111	GOTERM_MF	nucleoside-triphosphatase activity	53	3.40398	1.08796e-05	Os01g0112800,Os01g0173900,Os01g0218700,Os01g0618800,Os01g0870300,Os01g0911300,Os02g0288400,Os03g0262300,Os03g0387000, Os03g0584400,Os03g0599000,Os03g0686300,Os04g0111100,Os04g0325300,Os04g0378575,Os04g0413000,Os05g0365300,Os05g0414300, Os05g0548300,Os05g0596600,Os06g0109400,Os06g0524900,Os07g0294100,Os07g0517800,Os07g0522500,Os08g0190300,Os08g0372700, Os08g0373000,Os08g0564100,Os09g0272900,Os09g0…	1557	545	32072	2.00317	0.00481966	0.00169244	0.000253666
