# Supplementary material for: Comparative Genomic Analysis of Rice with Contrasting Photosynthesis and Grain Production under Salt Stress
Source: Genes (Basel). 2019 Jul 25;10(8):562. doi: 10.3390/genes10080562 (PMC6722916; doi:10.3390/genes10080562)
Supplement: Supplementary file 1 [file genes-10-00562-s001.zip › All Supplementary Files/TableS1.xlsx]

## Sheet: Sheet1
Table S1 List of rice varieties, parental lines, collector number and herbarium number used in this study
No.	Variety	GS No.	Parental Lines	Collector Number	Herbarium Number
1	Pokkali	-	India local	SCW 73	016176 (BCU)
2	Hahng Nahk	5583	Thai local	SCW 60	016144 (BCU)
3	Daw Khao	12155	Thai local	SCW 26	016135 (BCU)
4	Man Wua	12166	Thai local	-*	-*
5	Plah Sew Dam	23266	Thai local	SCW 6	016116 (BCU)
6	E-mum	5639	Thai local	SCW 61	016154 (BCU)
7	Rahk Haeng	12177	Thai local	SCW 62	016139 (BCU)
8	In Paeng	13981	Thai local	SCW 49	016174 (BCU)
9	Sam Ahang	13987	Thai local	SCW 84	016283 (BCU)
10	Ma Yom	13988	Thai local	SCW 29	016122 (BCU)
11	Tah Bahn	21695	Thai local	SCW 42	016137 (BCU)
12	Mahk Yom	21706	Thai local	SCW 82	016246 (BCU)
13	Hahng Mah Nai	21707	Thai local	SCW 53	016146 (BCU)
14	Khitom Khao	21708	Thai local	SCW 52	016173 (BCU)
15	Mahk Bid	21712	Thai local	-*	-*
16	Leuang Dong	22046	Thai local	-*	-*
17	Ruang Diaw	22834	Thai local	SCW 50	016162 (BCU)
18	Mae Mai	23227	Thai local	-*	-*
19	Plah Khaeng	3241	Thai local	SCW 28	016125 (BCU)
20	Jao Khao	3330	Thai local	SCW 74	016171 (BCU)
21	Muay Hin	5580	Thai local	SCW 13	016115 (BCU)
22	Dawk Mai	15127	Thai local	SCW 58	016150 (BCU)
23	Ta Pow Lom	22357	Thai local	SCW 83	016248 (BCU)
24	Di Si	22367	Thai local	SCW 68	016168 (BCU)
25	Med Makham	22391	Thai local	SCW 67	016138 (BCU)
26	Niaw Mali	22875	Thai local	SCW 80	016293 (BCU)
27	Daw Dawk Mai	22817	Thai local	SCW 65	016132 (BCU)
28	Nahng Nuan	3151	Thai local	SCW 138	016207 (BCU)
29	Sew Mae Jan	4001	Thai local	-*	-*
30	Leuang Pratew 123	868	Thai local	SCW 139	016237 (BCU)
* No sample in herbarium. Samples are being prepared.
