# Supplementary material for: Comparative Genomic Analysis of Rice with Contrasting Photosynthesis and Grain Production under Salt Stress
Source: Genes (Basel). 2019 Jul 25;10(8):562. doi: 10.3390/genes10080562 (PMC6722916; doi:10.3390/genes10080562)
Supplement: Supplementary file 1 [file genes-10-00562-s001.zip › All Supplementary Files/TableS8.xlsx]

## Sheet: Sheet1
Table S8 Variation in 262 genes identified in MY/KK-JK/NN to be expressed in reproductive tissues
RAP Id	MSU Id	Description	Chr	Position	Ref	Alt	Sequence Ontology	EFF[*].IMPACT
OS01G0113700	LOC_Os01g02350	receptor-like kinase ARK1AS, putative, expressed	1	744943	A	G	missense_variant	MODERATE
OS01G0113700	LOC_Os01g02350	receptor-like kinase ARK1AS, putative, expressed	1	743607	A	T	missense_variant	MODERATE
OS01G0113800	LOC_Os01g02360	resistance-related receptor-like kinase, putative, expressed	1	746281	C	G	missense_variant	MODERATE
OS01G0113800	LOC_Os01g02360	resistance-related receptor-like kinase, putative, expressed	1	746308	A	G	missense_variant	MODERATE
OS01G0113800	LOC_Os01g02360	resistance-related receptor-like kinase, putative, expressed	1	746309	C	T	missense_variant	MODERATE
OS01G0113800	LOC_Os01g02360	resistance-related receptor-like kinase, putative, expressed	1	746321	A	G	missense_variant	MODERATE
OS01G0113800	LOC_Os01g02360	resistance-related receptor-like kinase, putative, expressed	1	746333	G	A	missense_variant	MODERATE
OS01G0113800	LOC_Os01g02360	resistance-related receptor-like kinase, putative, expressed	1	747625	A	G	missense_variant	MODERATE
OS01G0113800	LOC_Os01g02360	resistance-related receptor-like kinase, putative, expressed	1	747727	A	G	missense_variant	MODERATE
OS01G0113800	LOC_Os01g02360	resistance-related receptor-like kinase, putative, expressed	1	747590	ACT	A	frameshift_variant	HIGH
OS01G0114100	LOC_Os01g02390	protein kinase domain containing protein, expressed	1	768155	G	A	missense_variant	MODERATE
OS01G0116300	LOC_Os01g02690	resistance-related receptor-like kinase, putative, expressed	1	916093	A	G	missense_variant	MODERATE
OS01G0117000	LOC_Os01g02760	receptor-like kinase, putative, expressed	1	959694	T	C	missense_variant	MODERATE
OS01G0136800	LOC_Os01g04450	OsWAK2 - OsWAK receptor-like cytoplasmic kinase OsWAK-RLCK, expressed	1	1981622	A	T	missense_variant	MODERATE
OS01G0136900	LOC_Os01g04460	Ser/Thr protein kinase, putative, expressed	1	1984978	T	G	missense_variant	MODERATE
OS01G0137282	LOC_Os01g04490	Ser/Thr protein kinase, putative, expressed	1	1999545	G	A	missense_variant	MODERATE
OS01G0137282	LOC_Os01g04490	Ser/Thr protein kinase, putative, expressed	1	1999587	T	A	missense_variant	MODERATE
OS01G0137500	LOC_Os01g04520	Ser/Thr protein kinase, putative, expressed	1	2017063	T	A	stop_gained	HIGH
OS01G0137500	LOC_Os01g04520	Ser/Thr protein kinase, putative, expressed	1	2017143	C	A	missense_variant	MODERATE
OS01G0137500	LOC_Os01g04520	Ser/Thr protein kinase, putative, expressed	1	2017147	C	A	missense_variant	MODERATE
OS01G0137500	LOC_Os01g04520	Ser/Thr protein kinase, putative, expressed	1	2017194	A	G	missense_variant	MODERATE
OS01G0147400	LOC_Os01g05440	XH domain containing protein, expressed	1	2570900	G	T	missense_variant	MODERATE
OS01G0161300	LOC_Os01g06790	disease resistance protein, putative, expressed	1	3222447	A	G	missense_variant	MODERATE
OS01G0161300	LOC_Os01g06790	disease resistance protein, putative, expressed	1	3222458	C	G	missense_variant	MODERATE
OS01G0161300	LOC_Os01g06790	disease resistance protein, putative, expressed	1	3224559	A	T	missense_variant	MODERATE
OS01G0161300	LOC_Os01g06790	disease resistance protein, putative, expressed	1	3222451	A	AC	frameshift_variant	HIGH
OS01G0161300	LOC_Os01g06790	disease resistance protein, putative, expressed	1	3222454	CA	C	frameshift_variant	HIGH
OS01G0173900	LOC_Os01g07870	ABC transporter family protein, putative, expressed	1	3806688	A	G	missense_variant	MODERATE
OS01G0218700	LOC_Os01g11946	ABC transporter, ATP-binding protein, putative, expressed	1	6503036	G	A	missense_variant	MODERATE
OS01G0227200	LOC_Os01g12720	protein kinase domain containing protein, expressed	1	7041499	C	T	missense_variant	MODERATE
OS01G0311500	LOC_Os01g20940	PHS1, putative, expressed	1	11699041	T	A	missense_variant	MODERATE
OS01G0327600	LOC_Os01g22390	WD domain containing protein, putative, expressed	1	12592926	G	A	missense_variant	MODERATE
OS01G0520600	LOC_Os01g33684	disease resistance RPP13-like protein 1, putative, expressed	1	18540085	T	G,A	missense_variant	MODERATE
OS01G0541900	LOC_Os01g36080	protein phosphatase 2C containing protein, expressed	1	19965900	C	T	missense_variant	MODERATE
OS01G0603800	LOC_Os01g41930	leucine rich repeat protein, putative, expressed	1	23778566	A	T	stop_gained	HIGH
OS01G0603800	LOC_Os01g41930	leucine rich repeat protein, putative, expressed	1	23778590	C	CG	frameshift_variant	HIGH
OS01G0603800	LOC_Os01g41930	leucine rich repeat protein, putative, expressed	1	23778537	C	T	missense_variant	MODERATE
OS01G0603800	LOC_Os01g41930	leucine rich repeat protein, putative, expressed	1	23778540	G	A	missense_variant	MODERATE
OS01G0603800	LOC_Os01g41930	leucine rich repeat protein, putative, expressed	1	23778567	A	C	missense_variant	MODERATE
OS01G0603800	LOC_Os01g41930	leucine rich repeat protein, putative, expressed	1	23778572	C	G	missense_variant	MODERATE
OS01G0603800	LOC_Os01g41930	leucine rich repeat protein, putative, expressed	1	23778578	A	G	missense_variant	MODERATE
OS01G0618800	LOC_Os01g43150	OsFtsH9 FtsH protease, homologue of AtFtsH11, expressed	1	24617946	C	T	missense_variant	MODERATE
OS01G0689900	LOC_Os01g49529	OsWAK10d - OsWAK receptor-like cytoplasmic kinase OsWAK-RLCK, expressed	1	28495524	G	T	missense_variant	MODERATE
OS01G0689900	LOC_Os01g49529	OsWAK10d - OsWAK receptor-like cytoplasmic kinase OsWAK-RLCK, expressed	1	28495527	C	G	missense_variant	MODERATE
OS01G0689900	LOC_Os01g49529	OsWAK10d - OsWAK receptor-like cytoplasmic kinase OsWAK-RLCK, expressed	1	28495528	C	A	missense_variant	MODERATE
OS01G0689900	LOC_Os01g49529	OsWAK10d - OsWAK receptor-like cytoplasmic kinase OsWAK-RLCK, expressed	1	28495538	A	C	missense_variant	MODERATE
OS01G0690800	LOC_Os01g49614	Protein kinase domain containing protein, expressed	1	28531802	T	A	missense_variant	MODERATE
OS01G0711200	LOC_Os01g51400	Leucine Rich Repeat family protein, expressed	1	29552776	T	G	missense_variant	MODERATE
OS01G0742400	LOC_Os01g53920	receptor-like protein kinase 5 precursor, putative, expressed	1	31006792	C	T	missense_variant	MODERATE
OS01G0742400	LOC_Os01g53920	receptor-like protein kinase 5 precursor, putative, expressed	1	31006796	A	T	missense_variant	MODERATE
OS01G0742400	LOC_Os01g53920	receptor-like protein kinase 5 precursor, putative, expressed	1	31006797	A	C	missense_variant	MODERATE
OS01G0742400	LOC_Os01g53920	receptor-like protein kinase 5 precursor, putative, expressed	1	31007367	C	G	missense_variant	MODERATE
OS01G0742400	LOC_Os01g53920	receptor-like protein kinase 5 precursor, putative, expressed	1	31007371	C	T	missense_variant	MODERATE
OS01G0742400	LOC_Os01g53920	receptor-like protein kinase 5 precursor, putative, expressed	1	31007377	T	A	missense_variant	MODERATE
OS01G0742400	LOC_Os01g53920	receptor-like protein kinase 5 precursor, putative, expressed	1	31007383	C	A	missense_variant	MODERATE
OS01G0742400	LOC_Os01g53920	receptor-like protein kinase 5 precursor, putative, expressed	1	31007393	G	T	missense_variant	MODERATE
OS01G0742400	LOC_Os01g53920	receptor-like protein kinase 5 precursor, putative, expressed	1	31007405	T	G	missense_variant	MODERATE
OS01G0744300	LOC_Os01g54100	CK1_CaseinKinase_1a.2 - CK1 includes the casein kinase 1 kinases, expressed	1	31114571	T	C	missense_variant&splice_region_variant	MODERATE
OS01G0754200	LOC_Os01g55040	1,3-beta-glucan synthase component, putative, expressed	1	31644912	C	G	missense_variant	MODERATE
OS01G0759200	LOC_Os01g55440	CAMK_KIN1/SNF1/Nim1_like.1 - CAMK includes calcium/calmodulin depedent protein kinases, expressed	1	31939109	A	C	missense_variant	MODERATE
OS01G0781200	LOC_Os01g57280	rp1, putative, expressed	1	33101161	A	G	missense_variant	MODERATE
OS01G0782200	LOC_Os01g57350	diacylglycerol kinase, putative, expressed	1	33146527	C	T	missense_variant	MODERATE
OS01G0782200	LOC_Os01g57350	diacylglycerol kinase, putative, expressed	1	33146531	C	T	missense_variant	MODERATE
OS01G0782200	LOC_Os01g57350	diacylglycerol kinase, putative, expressed	1	33146534	C	T	missense_variant	MODERATE
OS01G0810500	LOC_Os01g59550	senescence-induced receptor-like serine/threonine-protein kinase precursor, putative, expressed	1	34433516	T	A	missense_variant	MODERATE
OS01G0810500	LOC_Os01g59550	senescence-induced receptor-like serine/threonine-protein kinase precursor, putative, expressed	1	34433528	A	T	missense_variant	MODERATE
OS01G0810600	LOC_Os01g59560	protein kinase domain containing protein, expressed	1	34439934	T	G	missense_variant&splice_region_variant	MODERATE
OS01G0810600	LOC_Os01g59560	protein kinase domain containing protein, expressed	1	34442278	T	C	missense_variant	MODERATE
OS01G0810600	LOC_Os01g59560	protein kinase domain containing protein, expressed	1	34442281	G	T	missense_variant	MODERATE
OS01G0810600	LOC_Os01g59560	protein kinase domain containing protein, expressed	1	34442374	A	C	missense_variant	MODERATE
OS01G0810600	LOC_Os01g59560	protein kinase domain containing protein, expressed	1	34442388	G	T	missense_variant	MODERATE
OS01G0810600	LOC_Os01g59560	protein kinase domain containing protein, expressed	1	34442401	T	C	missense_variant	MODERATE
OS01G0810600	LOC_Os01g59560	protein kinase domain containing protein, expressed	1	34442404	T	C	missense_variant	MODERATE
OS01G0810600	LOC_Os01g59560	protein kinase domain containing protein, expressed	1	34442433	A	G	missense_variant	MODERATE
OS01G0810600	LOC_Os01g59560	protein kinase domain containing protein, expressed	1	34442448	T	A	missense_variant	MODERATE
OS01G0810600	LOC_Os01g59560	protein kinase domain containing protein, expressed	1	34442454	C	T	missense_variant	MODERATE
OS01G0836700	LOC_Os01g61960	GPR107 precursor, putative, expressed	1	35869685	T	C	missense_variant	MODERATE
OS01G0852200	LOC_Os01g63290	transporter, major facilitator family, putative, expressed	1	36691119	A	G	missense_variant	MODERATE
OS01G0911300	LOC_Os01g68330	antigen peptide transporter-like 1, chloroplast precursor, putative, expressed	1	39703895	G	T	missense_variant	MODERATE
OS01G0925300	LOC_Os01g70100	zinc finger DHHC domain-containing protein, putative, expressed	1	40567176	C	T	missense_variant	MODERATE
OS01G0925300	LOC_Os01g70100	zinc finger DHHC domain-containing protein, putative, expressed	1	40567189	C	T	missense_variant	MODERATE
OS01G0925300	LOC_Os01g70100	zinc finger DHHC domain-containing protein, putative, expressed	1	40567725	T	C	missense_variant	MODERATE
OS01G0937300	LOC_Os01g71100	expressed protein	1	41152599	G	T	missense_variant	MODERATE
OS01G0937300	LOC_Os01g71100	expressed protein	1	41152614	C	A	missense_variant	MODERATE
OS02G0109100	LOC_Os02g01920	GHMP kinases ATP-binding protein, putative, expressed	2	497084	G	A	missense_variant	MODERATE
OS02G0127700	LOC_Os02g03540	phosphoribosyl transferase, putative, expressed	2	1439928	AC	A	frameshift_variant	HIGH
OS02G0127700	LOC_Os02g03540	phosphoribosyl transferase, putative, expressed	2	1439888	AGGG	A	disruptive_inframe_deletion	MODERATE
OS02G0153100	LOC_Os02g05910	phytosulfokine receptor precursor, putative, expressed	2	2936290	G	C	missense_variant	MODERATE
OS02G0153100	LOC_Os02g05910	phytosulfokine receptor precursor, putative, expressed	2	2936291	T	A	missense_variant	MODERATE
OS02G0153200	LOC_Os02g05920	phytosulfokine receptor precursor, putative, expressed	2	2940508	C	G	missense_variant	MODERATE
OS02G0153200	LOC_Os02g05920	phytosulfokine receptor precursor, putative, expressed	2	2940578	C	G	missense_variant	MODERATE
OS02G0153200	LOC_Os02g05920	phytosulfokine receptor precursor, putative, expressed	2	2940208	C	A	stop_gained	HIGH
OS02G0153500	LOC_Os02g05940	phytosulfokine receptor precursor, putative, expressed	2	2955059	A	G	missense_variant	MODERATE
OS02G0153500	LOC_Os02g05940	phytosulfokine receptor precursor, putative, expressed	2	2954425	G	C	missense_variant	MODERATE
OS02G0153500	LOC_Os02g05940	phytosulfokine receptor precursor, putative, expressed	2	2954439	A	T	missense_variant	MODERATE
OS02G0153500	LOC_Os02g05940	phytosulfokine receptor precursor, putative, expressed	2	2954445	C	G	missense_variant	MODERATE
OS02G0153700	LOC_Os02g05950	phytosulfokine receptor precursor, putative, expressed	2	2961813	T	C	missense_variant	MODERATE
OS02G0155400	LOC_Os02g06090	phytosulfokine receptor precursor, putative, expressed	2	3038658	A	T	missense_variant	MODERATE
OS02G0155400	LOC_Os02g06090	phytosulfokine receptor precursor, putative, expressed	2	3038667	A	G	missense_variant	MODERATE
OS02G0155600	LOC_Os02g06120	Leucine Rich Repeat family protein, expressed	2	3049626	G	A	missense_variant	MODERATE
OS02G0156200	LOC_Os02g06180	phytosulfokine receptor precursor, putative, expressed	2	3084944	A	G	stop_lost&splice_region_variant	HIGH
OS02G0156200	LOC_Os02g06180	phytosulfokine receptor precursor, putative, expressed	2	3084965	A	G	missense_variant	MODERATE
OS02G0156200	LOC_Os02g06180	phytosulfokine receptor precursor, putative, expressed	2	3085009	C	G	missense_variant	MODERATE
OS02G0156200	LOC_Os02g06180	phytosulfokine receptor precursor, putative, expressed	2	3085075	A	G	missense_variant	MODERATE
OS02G0156633	LOC_Os02g06205	phytosulfokine receptor precursor, putative, expressed	2	3103422	A	G	missense_variant	MODERATE
OS02G0214900	LOC_Os02g12350	histone deacetylase, putative, expressed	2	6427396	G	C	missense_variant	MODERATE
OS02G0227600	LOC_Os02g13420	leucine-rich repeat receptor protein kinase EXS precursor, putative, expressed	2	7165212	C	CT	frameshift_variant	HIGH
OS02G0227600	LOC_Os02g13420	leucine-rich repeat receptor protein kinase EXS precursor, putative, expressed	2	7165217	G	GGT	frameshift_variant	HIGH
OS02G0227600	LOC_Os02g13420	leucine-rich repeat receptor protein kinase EXS precursor, putative, expressed	2	7165222	G	GATGA	frameshift_variant&stop_gained	HIGH
OS02G0227600	LOC_Os02g13420	leucine-rich repeat receptor protein kinase EXS precursor, putative, expressed	2	7165069	A	T	missense_variant	MODERATE
OS02G0227600	LOC_Os02g13420	leucine-rich repeat receptor protein kinase EXS precursor, putative, expressed	2	7165219	ACCG	A	conservative_inframe_deletion	MODERATE
OS02G0227600	LOC_Os02g13420	leucine-rich repeat receptor protein kinase EXS precursor, putative, expressed	2	7165240	T	C	missense_variant	MODERATE
OS02G0227600	LOC_Os02g13420	leucine-rich repeat receptor protein kinase EXS precursor, putative, expressed	2	7165299	A	G	missense_variant	MODERATE
OS02G0227600	LOC_Os02g13420	leucine-rich repeat receptor protein kinase EXS precursor, putative, expressed	2	7165306	G	A	missense_variant	MODERATE
OS02G0227600	LOC_Os02g13420	leucine-rich repeat receptor protein kinase EXS precursor, putative, expressed	2	7165307	G	T	missense_variant	MODERATE
OS02G0227600	LOC_Os02g13420	leucine-rich repeat receptor protein kinase EXS precursor, putative, expressed	2	7165339	C	G	missense_variant	MODERATE
OS02G0227700	LOC_Os02g13430	receptor-like protein kinase 5 precursor, putative, expressed	2	7172938	G	A	missense_variant	MODERATE
OS02G0228300	LOC_Os02g13510	receptor-like protein kinase 5 precursor, putative, expressed	2	7222523	T	C	missense_variant	MODERATE
OS02G0228300	LOC_Os02g13510	receptor-like protein kinase 5 precursor, putative, expressed	2	7222862	T	C	missense_variant	MODERATE
OS02G0228300	LOC_Os02g13510	receptor-like protein kinase 5 precursor, putative, expressed	2	7223062	G	A	missense_variant	MODERATE
OS02G0232500	LOC_Os02g13850	leucine-rich repeat-containing protein kinase family protein, putative, expressed	2	7507345	G	C	missense_variant	MODERATE
OS02G0523500	LOC_Os02g32350	TUDOR protein with multiple SNc domains, putative, expressed	2	19100892	A	T	missense_variant	MODERATE
OS02G0553000	LOC_Os02g34790	receptor-like protein kinase 5 precursor, putative, expressed	2	20857667	T	C	missense_variant	MODERATE
OS02G0553000	LOC_Os02g34790	receptor-like protein kinase 5 precursor, putative, expressed	2	20857668	G	A	missense_variant	MODERATE
OS02G0602100	LOC_Os02g39010	cyclin-dependent kinase G-1, putative, expressed	2	23564262	G	T	missense_variant	MODERATE
OS02G0736200	LOC_Os02g50330	RNA-dependent RNA polymerase, putative, expressed	2	30732909	C	CAGGGTGCAAGTTACACCTGCTAA	frameshift_variant	HIGH
OS02G0787600	LOC_Os02g54640	glutamate receptor, putative, expressed	2	33474193	A	G	missense_variant	MODERATE
OS02G0787600	LOC_Os02g54640	glutamate receptor, putative, expressed	2	33474238	G	T	missense_variant	MODERATE
OS02G0805800	LOC_Os02g56200	ELMO/CED-12 family protein, putative, expressed	2	34375762	C	A	missense_variant	MODERATE
OS02G0818500	LOC_Os02g57310	pib, putative, expressed	2	35115216	C	T	missense_variant	MODERATE
OS02G0818500	LOC_Os02g57310	pib, putative, expressed	2	35115273	C	T	missense_variant	MODERATE
OS02G0818500	LOC_Os02g57310	pib, putative, expressed	2	35115381	C	T	missense_variant	MODERATE
OS02G0818500	LOC_Os02g57310	pib, putative, expressed	2	35115404	G	A	missense_variant	MODERATE
OS02G0818500	LOC_Os02g57310	pib, putative, expressed	2	35115405	C	T	missense_variant	MODERATE
OS02G0818500	LOC_Os02g57310	pib, putative, expressed	2	35115465	G	T	missense_variant	MODERATE
OS02G0818500	LOC_Os02g57310	pib, putative, expressed	2	35115521	C	A	missense_variant	MODERATE
OS02G0818500	LOC_Os02g57310	pib, putative, expressed	2	35115453	G	GAA	frameshift_variant	HIGH
OS02G0822900	LOC_Os02g57700	protein kinase, putative, expressed	2	35337959	C	G	missense_variant	MODERATE
OS03G0110500	LOC_Os03g01980	KIP1, putative, expressed	3	611671	G	A	missense_variant	MODERATE
OS03G0117800	LOC_Os03g02640	methylthioribose kinase, putative, expressed	3	975322	A	G	missense_variant	MODERATE
OS03G0124300	LOC_Os03g03290	receptor-like protein kinase At3g46290 precursor, putative, expressed	3	1410653	C	A	missense_variant	MODERATE
OS03G0129100	LOC_Os03g03700	MLO domain containing protein, putative, expressed	3	1645427	A	G	missense_variant	MODERATE
OS03G0251700	LOC_Os03g14710	protein kinase, putative, expressed	3	7999221	A	G	missense_variant	MODERATE
OS03G0262300	LOC_Os03g15580	AT hook motif family protein, expressed	3	8596557	A	AGGGGACGGCGAC	disruptive_inframe_insertion	MODERATE
OS03G0323500	LOC_Os03g20720	GTPase-activating protein, putative, expressed	3	11727229	A	G	missense_variant	MODERATE
OS03G0325000	LOC_Os03g20880	pyruvate kinase, putative, expressed	3	11820893	G	A	missense_variant	MODERATE
OS03G0347200	LOC_Os03g22570	MIF4G domain containing protein, putative, expressed	3	12984797	G	T	missense_variant	MODERATE
OS03G0387000	LOC_Os03g26960	intron-binding protein aquarius, putative, expressed	3	15418746	T	G	missense_variant	MODERATE
OS03G0401100	LOC_Os03g28300	protein kinase domain containing protein, expressed	3	16284368	A	G	missense_variant	MODERATE
OS03G0422800	LOC_Os03g30890	S-locus-like receptor protein kinase, putative, expressed	3	17602297	A	G	missense_variant	MODERATE
OS03G0422800	LOC_Os03g30890	S-locus-like receptor protein kinase, putative, expressed	3	17603352	C	T	missense_variant	MODERATE
OS03G0422900	LOC_Os03g30910	disease resistance protein RPM1, putative, expressed	3	17606218	A	C	missense_variant	MODERATE
OS03G0566700	LOC_Os03g36920	disease resistance protein, putative, expressed	3	20488399	G	T	missense_variant	MODERATE
OS03G0637600	LOC_Os03g43650	uncharacterized protein At4g06744 precursor, putative, expressed	3	24401646	G	A	missense_variant	MODERATE
OS03G0653900	LOC_Os03g45120	ribosome inactivating protein, putative, expressed	3	25463538	T	C	missense_variant	MODERATE
OS03G0686300	LOC_Os03g48140	myosin, putative, expressed	3	27385648	A	T	missense_variant	MODERATE
OS03G0687700	LOC_Os03g48220	expressed protein	3	27444870	T	C	missense_variant	MODERATE
OS03G0713500	LOC_Os03g50550	STE_MEK_ste7_MAP2K.7 - STE kinases include homologs to sterile 7, sterile 11 and sterile 20 from yeast, expressed	3	28862290	C	A	missense_variant	MODERATE
OS03G0713500	LOC_Os03g50550	STE_MEK_ste7_MAP2K.7 - STE kinases include homologs to sterile 7, sterile 11 and sterile 20 from yeast, expressed	3	28862292	T	G	missense_variant	MODERATE
OS03G0713500	LOC_Os03g50550	STE_MEK_ste7_MAP2K.7 - STE kinases include homologs to sterile 7, sterile 11 and sterile 20 from yeast, expressed	3	28862300	G	GC	frameshift_variant	HIGH
OS03G0713500	LOC_Os03g50550	STE_MEK_ste7_MAP2K.7 - STE kinases include homologs to sterile 7, sterile 11 and sterile 20 from yeast, expressed	3	28862302	C	CCG	frameshift_variant	HIGH
OS03G0713500	LOC_Os03g50550	STE_MEK_ste7_MAP2K.7 - STE kinases include homologs to sterile 7, sterile 11 and sterile 20 from yeast, expressed	3	28862311	G	GC	frameshift_variant	HIGH
OS03G0766500	LOC_Os03g55760	MYB family transcription factor, putative, expressed	3	31751240	TGGA	T	conservative_inframe_deletion	MODERATE
OS03G0789500	LOC_Os03g57560	piwi domain containing protein, expressed	3	32820899	G	A	missense_variant	MODERATE
OS03G0800200	LOC_Os03g58600	PAZ domain containing protein, putative, expressed	3	33375066	C	T	splice_acceptor_variant&intron_variant	HIGH
OS03G0800200	LOC_Os03g58600	PAZ domain containing protein, putative, expressed	3	33376480	GAC	G	frameshift_variant	HIGH
OS03G0800200	LOC_Os03g58600	PAZ domain containing protein, putative, expressed	3	33376483	G	GTA	frameshift_variant	HIGH
OS03G0800200	LOC_Os03g58600	PAZ domain containing protein, putative, expressed	3	33375166	A	G	missense_variant	MODERATE
OS03G0800200	LOC_Os03g58600	PAZ domain containing protein, putative, expressed	3	33375169	C	A	missense_variant	MODERATE
OS03G0800200	LOC_Os03g58600	PAZ domain containing protein, putative, expressed	3	33375170	G	T	missense_variant	MODERATE
OS03G0800200	LOC_Os03g58600	PAZ domain containing protein, putative, expressed	3	33376283	T	G	missense_variant	MODERATE
OS03G0800200	LOC_Os03g58600	PAZ domain containing protein, putative, expressed	3	33376290	G	A	missense_variant	MODERATE
OS03G0800200	LOC_Os03g58600	PAZ domain containing protein, putative, expressed	3	33376305	C	T	missense_variant	MODERATE
OS03G0800200	LOC_Os03g58600	PAZ domain containing protein, putative, expressed	3	33379671	C	T	missense_variant	MODERATE
OS03G0839900	LOC_Os03g62340	protein kinase family protein, putative, expressed	3	35315508	C	T	missense_variant	MODERATE
OS03G0841100	LOC_Os03g62430	OsWAK28 - OsWAK receptor-like protein kinase, expressed	3	35361496	T	C	missense_variant	MODERATE
OS03G0841100	LOC_Os03g62430	OsWAK28 - OsWAK receptor-like protein kinase, expressed	3	35363505	T	C	missense_variant	MODERATE
OS04G0107900	LOC_Os04g01740	heat shock protein, putative, expressed	4	483753	T	G	missense_variant	MODERATE
OS04G0227200	LOC_Os04g15660	receptor kinase, putative, expressed	4	8515346	C	T	missense_variant	MODERATE
OS04G0303100	LOC_Os04g23700	lectin protein kinase family protein, putative, expressed	4	13553195	C	T	missense_variant	MODERATE
OS04G0303100	LOC_Os04g23700	lectin protein kinase family protein, putative, expressed	4	13553197	T	G	missense_variant	MODERATE
OS04G0303100	LOC_Os04g23700	lectin protein kinase family protein, putative, expressed	4	13553219	T	C	missense_variant	MODERATE
OS04G0307500	LOC_Os04g24220	OsWAK32 - OsWAK receptor-like protein kinase, expressed	4	13864261	ATC	A	frameshift_variant	HIGH
OS04G0307500	LOC_Os04g24220	OsWAK32 - OsWAK receptor-like protein kinase, expressed	4	13864266	AGT	A	frameshift_variant	HIGH
OS04G0307500	LOC_Os04g24220	OsWAK32 - OsWAK receptor-like protein kinase, expressed	4	13864272	A	AT	frameshift_variant	HIGH
OS04G0307500	LOC_Os04g24220	OsWAK32 - OsWAK receptor-like protein kinase, expressed	4	13866150	C	T	stop_gained	HIGH
OS04G0307500	LOC_Os04g24220	OsWAK32 - OsWAK receptor-like protein kinase, expressed	4	13864177	G	T	missense_variant	MODERATE
OS04G0307500	LOC_Os04g24220	OsWAK32 - OsWAK receptor-like protein kinase, expressed	4	13864181	T	A	missense_variant	MODERATE
OS04G0307500	LOC_Os04g24220	OsWAK32 - OsWAK receptor-like protein kinase, expressed	4	13864182	G	C	missense_variant	MODERATE
OS04G0307500	LOC_Os04g24220	OsWAK32 - OsWAK receptor-like protein kinase, expressed	4	13864200	A	C	missense_variant	MODERATE
OS04G0307500	LOC_Os04g24220	OsWAK32 - OsWAK receptor-like protein kinase, expressed	4	13864201	C	T	missense_variant	MODERATE
OS04G0307500	LOC_Os04g24220	OsWAK32 - OsWAK receptor-like protein kinase, expressed	4	13864207	G	C	missense_variant	MODERATE
OS04G0307500	LOC_Os04g24220	OsWAK32 - OsWAK receptor-like protein kinase, expressed	4	13864215	A	G	missense_variant	MODERATE
OS04G0307500	LOC_Os04g24220	OsWAK32 - OsWAK receptor-like protein kinase, expressed	4	13864216	G	A	missense_variant	MODERATE
OS04G0307500	LOC_Os04g24220	OsWAK32 - OsWAK receptor-like protein kinase, expressed	4	13864241	C	G	missense_variant	MODERATE
OS04G0307500	LOC_Os04g24220	OsWAK32 - OsWAK receptor-like protein kinase, expressed	4	13864252	A	AGCT	conservative_inframe_insertion	MODERATE
OS04G0307500	LOC_Os04g24220	OsWAK32 - OsWAK receptor-like protein kinase, expressed	4	13864258	T	TCAA	conservative_inframe_insertion	MODERATE
OS04G0307500	LOC_Os04g24220	OsWAK32 - OsWAK receptor-like protein kinase, expressed	4	13864269	G	C	missense_variant	MODERATE
OS04G0307500	LOC_Os04g24220	OsWAK32 - OsWAK receptor-like protein kinase, expressed	4	13864288	T	A	missense_variant	MODERATE
OS04G0307500	LOC_Os04g24220	OsWAK32 - OsWAK receptor-like protein kinase, expressed	4	13864627	A	T	missense_variant	MODERATE
OS04G0307500	LOC_Os04g24220	OsWAK32 - OsWAK receptor-like protein kinase, expressed	4	13864633	T	C	missense_variant	MODERATE
OS04G0307500	LOC_Os04g24220	OsWAK32 - OsWAK receptor-like protein kinase, expressed	4	13865919	T	C	missense_variant	MODERATE
OS04G0307500	LOC_Os04g24220	OsWAK32 - OsWAK receptor-like protein kinase, expressed	4	13865920	C	T	missense_variant	MODERATE
OS04G0307500	LOC_Os04g24220	OsWAK32 - OsWAK receptor-like protein kinase, expressed	4	13865940	A	G	missense_variant	MODERATE
OS04G0307500	LOC_Os04g24220	OsWAK32 - OsWAK receptor-like protein kinase, expressed	4	13865947	T	C	missense_variant	MODERATE
OS04G0307500	LOC_Os04g24220	OsWAK32 - OsWAK receptor-like protein kinase, expressed	4	13865948	A	T	missense_variant	MODERATE
OS04G0307500	LOC_Os04g24220	OsWAK32 - OsWAK receptor-like protein kinase, expressed	4	13865973	G	A	missense_variant	MODERATE
OS04G0307500	LOC_Os04g24220	OsWAK32 - OsWAK receptor-like protein kinase, expressed	4	13865979	C	A	missense_variant	MODERATE
OS04G0307500	LOC_Os04g24220	OsWAK32 - OsWAK receptor-like protein kinase, expressed	4	13865980	A	C	missense_variant	MODERATE
OS04G0307500	LOC_Os04g24220	OsWAK32 - OsWAK receptor-like protein kinase, expressed	4	13865986	C	A	missense_variant	MODERATE
OS04G0307500	LOC_Os04g24220	OsWAK32 - OsWAK receptor-like protein kinase, expressed	4	13865996	T	A	missense_variant	MODERATE
OS04G0307500	LOC_Os04g24220	OsWAK32 - OsWAK receptor-like protein kinase, expressed	4	13865998	TCAG	T	disruptive_inframe_deletion	MODERATE
OS04G0307500	LOC_Os04g24220	OsWAK32 - OsWAK receptor-like protein kinase, expressed	4	13866005	T	TGAG	disruptive_inframe_insertion	MODERATE
OS04G0307500	LOC_Os04g24220	OsWAK32 - OsWAK receptor-like protein kinase, expressed	4	13866018	G	A	missense_variant	MODERATE
OS04G0307500	LOC_Os04g24220	OsWAK32 - OsWAK receptor-like protein kinase, expressed	4	13866027	A	T	missense_variant	MODERATE
OS04G0307500	LOC_Os04g24220	OsWAK32 - OsWAK receptor-like protein kinase, expressed	4	13866030	A	T	missense_variant	MODERATE
OS04G0307500	LOC_Os04g24220	OsWAK32 - OsWAK receptor-like protein kinase, expressed	4	13866033	G	T	missense_variant	MODERATE
OS04G0307500	LOC_Os04g24220	OsWAK32 - OsWAK receptor-like protein kinase, expressed	4	13866142	T	A	missense_variant	MODERATE
OS04G0307500	LOC_Os04g24220	OsWAK32 - OsWAK receptor-like protein kinase, expressed	4	13866151	A	G	missense_variant	MODERATE
OS04G0307500	LOC_Os04g24220	OsWAK32 - OsWAK receptor-like protein kinase, expressed	4	13866160	T	A	missense_variant	MODERATE
OS04G0307900	LOC_Os04g24290	wall-associated receptor kinase 3 precursor, putative, expressed	4	13914375	T	TTCAG	frameshift_variant	HIGH
OS04G0307900	LOC_Os04g24290	wall-associated receptor kinase 3 precursor, putative, expressed	4	13915004	GC	G	frameshift_variant	HIGH
OS04G0307900	LOC_Os04g24290	wall-associated receptor kinase 3 precursor, putative, expressed	4	13913872	G	T	missense_variant	MODERATE
OS04G0307900	LOC_Os04g24290	wall-associated receptor kinase 3 precursor, putative, expressed	4	13913882	G	A	missense_variant	MODERATE
OS04G0307900	LOC_Os04g24290	wall-associated receptor kinase 3 precursor, putative, expressed	4	13913894	A	G	missense_variant	MODERATE
OS04G0307900	LOC_Os04g24290	wall-associated receptor kinase 3 precursor, putative, expressed	4	13913897	A	G	missense_variant	MODERATE
OS04G0307900	LOC_Os04g24290	wall-associated receptor kinase 3 precursor, putative, expressed	4	13913908	C	A	missense_variant	MODERATE
OS04G0307900	LOC_Os04g24290	wall-associated receptor kinase 3 precursor, putative, expressed	4	13913968	T	A	missense_variant	MODERATE
OS04G0307900	LOC_Os04g24290	wall-associated receptor kinase 3 precursor, putative, expressed	4	13913988	C	A	missense_variant	MODERATE
OS04G0307900	LOC_Os04g24290	wall-associated receptor kinase 3 precursor, putative, expressed	4	13914050	A	G	missense_variant	MODERATE
OS04G0307900	LOC_Os04g24290	wall-associated receptor kinase 3 precursor, putative, expressed	4	13914051	T	A	missense_variant	MODERATE
OS04G0307900	LOC_Os04g24290	wall-associated receptor kinase 3 precursor, putative, expressed	4	13914055	C	A	missense_variant	MODERATE
OS04G0307900	LOC_Os04g24290	wall-associated receptor kinase 3 precursor, putative, expressed	4	13914133	G	C	missense_variant	MODERATE
OS04G0307900	LOC_Os04g24290	wall-associated receptor kinase 3 precursor, putative, expressed	4	13914139	A	C	missense_variant	MODERATE
OS04G0307900	LOC_Os04g24290	wall-associated receptor kinase 3 precursor, putative, expressed	4	13914144	A	C	missense_variant	MODERATE
OS04G0307900	LOC_Os04g24290	wall-associated receptor kinase 3 precursor, putative, expressed	4	13914251	T	C	missense_variant	MODERATE
OS04G0307900	LOC_Os04g24290	wall-associated receptor kinase 3 precursor, putative, expressed	4	13914274	G	A	missense_variant	MODERATE
OS04G0307900	LOC_Os04g24290	wall-associated receptor kinase 3 precursor, putative, expressed	4	13914287	A	G	missense_variant	MODERATE
OS04G0307900	LOC_Os04g24290	wall-associated receptor kinase 3 precursor, putative, expressed	4	13914311	A	G	missense_variant	MODERATE
OS04G0307900	LOC_Os04g24290	wall-associated receptor kinase 3 precursor, putative, expressed	4	13914314	G	A	missense_variant	MODERATE
OS04G0307900	LOC_Os04g24290	wall-associated receptor kinase 3 precursor, putative, expressed	4	13914373	T	A	missense_variant	MODERATE
OS04G0307900	LOC_Os04g24290	wall-associated receptor kinase 3 precursor, putative, expressed	4	13914389	C	T	missense_variant	MODERATE
OS04G0307900	LOC_Os04g24290	wall-associated receptor kinase 3 precursor, putative, expressed	4	13914403	G	A	missense_variant	MODERATE
OS04G0307900	LOC_Os04g24290	wall-associated receptor kinase 3 precursor, putative, expressed	4	13914413	G	A	missense_variant	MODERATE
OS04G0307900	LOC_Os04g24290	wall-associated receptor kinase 3 precursor, putative, expressed	4	13914466	G	T	missense_variant	MODERATE
OS04G0307900	LOC_Os04g24290	wall-associated receptor kinase 3 precursor, putative, expressed	4	13914655	G	A	missense_variant	MODERATE
OS04G0307900	LOC_Os04g24290	wall-associated receptor kinase 3 precursor, putative, expressed	4	13914659	C	T	missense_variant	MODERATE
OS04G0307900	LOC_Os04g24290	wall-associated receptor kinase 3 precursor, putative, expressed	4	13914668	A	G	missense_variant	MODERATE
OS04G0307900	LOC_Os04g24290	wall-associated receptor kinase 3 precursor, putative, expressed	4	13914674	A	G	missense_variant	MODERATE
OS04G0307900	LOC_Os04g24290	wall-associated receptor kinase 3 precursor, putative, expressed	4	13914724	A	G	missense_variant	MODERATE
OS04G0307900	LOC_Os04g24290	wall-associated receptor kinase 3 precursor, putative, expressed	4	13914746	A	C	missense_variant	MODERATE
OS04G0307900	LOC_Os04g24290	wall-associated receptor kinase 3 precursor, putative, expressed	4	13914772	A	T	missense_variant	MODERATE
OS04G0307900	LOC_Os04g24290	wall-associated receptor kinase 3 precursor, putative, expressed	4	13914778	A	G	missense_variant	MODERATE
OS04G0307900	LOC_Os04g24290	wall-associated receptor kinase 3 precursor, putative, expressed	4	13914803	T	G	missense_variant	MODERATE
OS04G0307900	LOC_Os04g24290	wall-associated receptor kinase 3 precursor, putative, expressed	4	13914811	A	G	missense_variant	MODERATE
OS04G0307900	LOC_Os04g24290	wall-associated receptor kinase 3 precursor, putative, expressed	4	13914932	C	A	missense_variant	MODERATE
OS04G0307900	LOC_Os04g24290	wall-associated receptor kinase 3 precursor, putative, expressed	4	13914944	T	A	missense_variant	MODERATE
OS04G0307900	LOC_Os04g24290	wall-associated receptor kinase 3 precursor, putative, expressed	4	13914952	G	C	missense_variant	MODERATE
OS04G0307900	LOC_Os04g24290	wall-associated receptor kinase 3 precursor, putative, expressed	4	13914982	G	A	missense_variant	MODERATE
OS04G0325300	LOC_Os04g25900	go35 NBS-LRR, putative, expressed	4	15068294	T	A	missense_variant	MODERATE
OS04G0368800	LOC_Os04g30010	OsWAK45 - OsWAK receptor-like protein kinase, expressed	4	17908935	A	G	missense_variant	MODERATE
OS04G0368800	LOC_Os04g30010	OsWAK45 - OsWAK receptor-like protein kinase, expressed	4	17908950	T	C	missense_variant	MODERATE
OS04G0371100	LOC_Os04g30260	OsWAK47 - OsWAK receptor-like protein kinase, expressed	4	18064062	G	A	missense_variant	MODERATE
OS04G0378575	LOC_Os04g30930	NB-ARC domain containing protein, expressed	4	18491731	A	G	missense_variant	MODERATE
OS04G0378575	LOC_Os04g30930	NB-ARC domain containing protein, expressed	4	18491925	C	T	missense_variant	MODERATE
OS04G0378575	LOC_Os04g30930	NB-ARC domain containing protein, expressed	4	18491606	AG	A	frameshift_variant	HIGH
OS04G0378575	LOC_Os04g30930	NB-ARC domain containing protein, expressed	4	18492059	TG	T	frameshift_variant	HIGH
OS04G0401900	LOC_Os04g32940	Leucine Rich Repeat family protein, expressed	4	19900661	G	GGAT	disruptive_inframe_insertion	MODERATE
OS04G0413000	LOC_Os04g33700	ABC transmembrane transporter domain containing protein, expressed	4	20406317	C	T	missense_variant	MODERATE
OS04G0420900	LOC_Os04g34370	serine/threonine-protein kinase receptor precursor, putative, expressed	4	20818032	C	T	missense_variant	MODERATE
OS04G0420900	LOC_Os04g34370	serine/threonine-protein kinase receptor precursor, putative, expressed	4	20818048	C	A	missense_variant	MODERATE
OS04G0457800	LOC_Os04g38480	BRASSINOSTEROID INSENSITIVE 1-associated receptor kinase 1 precursor, putative, expressed	4	22872259	A	C	missense_variant	MODERATE
OS04G0457800	LOC_Os04g38480	BRASSINOSTEROID INSENSITIVE 1-associated receptor kinase 1 precursor, putative, expressed	4	22872262	G	C	missense_variant	MODERATE
OS04G0475100	LOC_Os04g39910	receptor-like protein kinase, putative, expressed	4	23772321	G	T	missense_variant	MODERATE
OS04G0488100	LOC_Os04g41110	Rad21 / Rec8 like protein, putative, expressed	4	24384999	G	A	missense_variant	MODERATE
OS04G0611700	LOC_Os04g52210	terpene synthase, putative, expressed	4	31023879	G	C	missense_variant	MODERATE
OS04G0611700	LOC_Os04g52210	terpene synthase, putative, expressed	4	31024045	C	CTGT	disruptive_inframe_insertion	MODERATE
OS04G0611700	LOC_Os04g52210	terpene synthase, putative, expressed	4	31023854	CGAGAGATGCA	C	frameshift_variant	HIGH
OS04G0616300	LOC_Os04g52600	SHR5-receptor-like kinase, putative, expressed	4	31278255	A	T	missense_variant	MODERATE
OS04G0616300	LOC_Os04g52600	SHR5-receptor-like kinase, putative, expressed	4	31278262	C	T	missense_variant	MODERATE
OS04G0616500	LOC_Os04g52614	SHR5-receptor-like kinase, putative, expressed	4	31302555	G	T	missense_variant	MODERATE
OS04G0616500	LOC_Os04g52614	SHR5-receptor-like kinase, putative, expressed	4	31302587	T	C	missense_variant	MODERATE
OS04G0616500	LOC_Os04g52614	SHR5-receptor-like kinase, putative, expressed	4	31303049	C	T	missense_variant	MODERATE
OS04G0620950	LOC_Os04g52970	NBS-LRR disease resistance protein, putative, expressed	4	31554566	C	T	missense_variant	MODERATE
OS04G0623066	LOC_Os04g53160	NBS-LRR disease resistance protein, putative, expressed	4	31661658	G	A	missense_variant	MODERATE
OS04G0623066	LOC_Os04g53160	NBS-LRR disease resistance protein, putative, expressed	4	31662108	C	T,G	missense_variant	MODERATE
OS04G0623066	LOC_Os04g53160	NBS-LRR disease resistance protein, putative, expressed	4	31662245	G	C,T	missense_variant	MODERATE
OS04G0623066	LOC_Os04g53160	NBS-LRR disease resistance protein, putative, expressed	4	31662248	G	C,T	missense_variant	MODERATE
OS04G0623066	LOC_Os04g53160	NBS-LRR disease resistance protein, putative, expressed	4	31662248	G	GTT	frameshift_variant	HIGH
OS04G0623066	LOC_Os04g53160	NBS-LRR disease resistance protein, putative, expressed	4	31661324	T	C	missense_variant	MODERATE
OS04G0623066	LOC_Os04g53160	NBS-LRR disease resistance protein, putative, expressed	4	31661333	T	G	missense_variant	MODERATE
OS04G0672100	LOC_Os04g57630	phytosulfokine receptor precursor, putative, expressed	4	34301468	T	G	missense_variant	MODERATE
OS04G0672100	LOC_Os04g57630	phytosulfokine receptor precursor, putative, expressed	4	34301470	G	C	missense_variant	MODERATE
OS04G0672100	LOC_Os04g57630	phytosulfokine receptor precursor, putative, expressed	4	34301472	C	T	missense_variant	MODERATE
OS05G0153200	LOC_Os05g06130	transcription factor X1, putative, expressed	5	3066190	T	A	missense_variant	MODERATE
OS05G0212200	LOC_Os05g12140	Leucine Rich Repeat family protein, expressed	5	6937335	G	T	missense_variant	MODERATE
OS05G0212200	LOC_Os05g12140	Leucine Rich Repeat family protein, expressed	5	6937340	G	A	missense_variant	MODERATE
OS05G0317700	LOC_Os05g25350	TKL_IRAK_CrRLK1L-1.12 - The CrRLK1L-1 subfamily has homology to the CrRLK1L homolog, expressed	5	14720069	G	A	missense_variant	MODERATE
OS05G0317700	LOC_Os05g25350	TKL_IRAK_CrRLK1L-1.12 - The CrRLK1L-1 subfamily has homology to the CrRLK1L homolog, expressed	5	14719915	ATT	A	frameshift_variant	HIGH
OS05G0334750	LOC_Os05g26940	CAMK_KIN1/SNF1/Nim1_like.23 - CAMK includes calcium/calmodulin depedent protein kinases, expressed	5	15643989	T	C	missense_variant	MODERATE
OS05G0365300	LOC_Os05g30220	disease resistance RPP13-like protein 1, putative, expressed	5	17516170	C	T	missense_variant	MODERATE
OS05G0365300	LOC_Os05g30220	disease resistance RPP13-like protein 1, putative, expressed	5	17516522	G	C	missense_variant	MODERATE
OS05G0387700	LOC_Os05g32170	TKL_IRAK_CR4L.5 - The CR4L subfamily has homology with Crinkly4, expressed	5	18759302	G	A	missense_variant	MODERATE
OS05G0399800	LOC_Os05g33160	inactive receptor kinase At1g27190 precursor, putative, expressed	5	19449160	T	G	missense_variant	MODERATE
OS05G0399800	LOC_Os05g33160	inactive receptor kinase At1g27190 precursor, putative, expressed	5	19449171	T	G	missense_variant	MODERATE
OS05G0414300	LOC_Os05g34230	disease resistance protein RGA3, putative, expressed	5	20264823	T	G	missense_variant	MODERATE
OS05G0466900	LOC_Os05g39080	protein kinase family protein, putative, expressed	5	22914110	C	T	missense_variant	MODERATE
OS05G0479800	LOC_Os05g40160	NB-ARC domain containing protein, expressed	5	23589268	G	T	missense_variant	MODERATE
OS05G0486100	LOC_Os05g40770	leucine-rich repeat family protein, putative, expressed	5	23902277	C	T	missense_variant	MODERATE
OS05G0486100	LOC_Os05g40770	leucine-rich repeat family protein, putative, expressed	5	23902280	G	C	missense_variant	MODERATE
OS05G0492600	LOC_Os05g41310	disease resistance protein RGA2, putative, expressed	5	24198102	T	C	missense_variant	MODERATE
OS05G0548300	LOC_Os05g47490	MDR-like ABC transporter, putative, expressed	5	27208244	A	T	missense_variant	MODERATE
OS05G0560300	LOC_Os05g48660	MRH1, putative, expressed	5	27886995	A	G	missense_variant	MODERATE
OS05G0560300	LOC_Os05g48660	MRH1, putative, expressed	5	27887004	T	G	missense_variant	MODERATE
OS05G0596600	LOC_Os05g51790	RecF/RecN/SMC N terminal domain containing protein, expressed	5	29737585	AAT	A	frameshift_variant	HIGH
OS05G0596600	LOC_Os05g51790	RecF/RecN/SMC N terminal domain containing protein, expressed	5	29737590	T	TTA	frameshift_variant	HIGH
OS05G0596600	LOC_Os05g51790	RecF/RecN/SMC N terminal domain containing protein, expressed	5	29737576	G	A	missense_variant	MODERATE
OS05G0596600	LOC_Os05g51790	RecF/RecN/SMC N terminal domain containing protein, expressed	5	29737582	C	T	missense_variant	MODERATE
OS05G0596600	LOC_Os05g51790	RecF/RecN/SMC N terminal domain containing protein, expressed	5	29737589	C	T	missense_variant	MODERATE
OS05G0596600	LOC_Os05g51790	RecF/RecN/SMC N terminal domain containing protein, expressed	5	29737620	T	G	missense_variant	MODERATE
OS05G0596600	LOC_Os05g51790	RecF/RecN/SMC N terminal domain containing protein, expressed	5	29737621	T	A	missense_variant	MODERATE
OS05G0596600	LOC_Os05g51790	RecF/RecN/SMC N terminal domain containing protein, expressed	5	29737625	T	C	missense_variant	MODERATE
OS05G0596600	LOC_Os05g51790	RecF/RecN/SMC N terminal domain containing protein, expressed	5	29737629	C	A	missense_variant&splice_region_variant	MODERATE
OS06G0109400	LOC_Os06g01980	AAA family ATPase, putative, expressed	6	554747	A	C	missense_variant	MODERATE
OS06G0116100	LOC_Os06g02550	CPuORF21 - conserved peptide uORF-containing transcript, expressed	6	887012	T	G	missense_variant	MODERATE
OS06G0140300	LOC_Os06g04840	leucine rich repeat protein, putative, expressed	6	2115378	T	G	missense_variant	MODERATE
OS06G0146100	LOC_Os06g05359	NBS-LRR disease resistance protein, putative, expressed	6	2414584	C	G	missense_variant	MODERATE
OS06G0146100	LOC_Os06g05359	NBS-LRR disease resistance protein, putative, expressed	6	2414606	G	A	missense_variant	MODERATE
OS06G0146100	LOC_Os06g05359	NBS-LRR disease resistance protein, putative, expressed	6	2414608	G	A	missense_variant	MODERATE
OS06G0146100	LOC_Os06g05359	NBS-LRR disease resistance protein, putative, expressed	6	2414801	G	C	missense_variant	MODERATE
OS06G0146100	LOC_Os06g05359	NBS-LRR disease resistance protein, putative, expressed	6	2414803	C	G	missense_variant	MODERATE
OS06G0146100	LOC_Os06g05359	NBS-LRR disease resistance protein, putative, expressed	6	2414810	C	A	missense_variant	MODERATE
OS06G0146100	LOC_Os06g05359	NBS-LRR disease resistance protein, putative, expressed	6	2414813	C	G	missense_variant	MODERATE
OS06G0146250	LOC_Os06g05380	WRKY73, expressed	6	2429308	C	T	missense_variant	MODERATE
OS06G0151700	LOC_Os06g05830	protein kinase domain containing protein, expressed	6	2663046	C	T	missense_variant	MODERATE
OS06G0167500	LOC_Os06g07130	SHR5-receptor-like kinase, putative, expressed	6	3417483	A	G	missense_variant	MODERATE
OS06G0259000	LOC_Os06g14750	phosphatidylinositol-4-phosphate 5-Kinase family protein, putative, expressed	6	8321325	G	T	missense_variant	MODERATE
OS06G0367900	LOC_Os06g26340	CGMC_MAPKCMGC_2.10 - CGMC includes CDA, MAPK, GSK3, and CLKC kinases, expressed	6	15416554	T	A	missense_variant	MODERATE
OS06G0367900	LOC_Os06g26340	CGMC_MAPKCMGC_2.10 - CGMC includes CDA, MAPK, GSK3, and CLKC kinases, expressed	6	15416656	C	T	missense_variant	MODERATE
OS06G0524900	LOC_Os06g33360	RGH1A, putative, expressed	6	19435057	C	T	missense_variant	MODERATE
OS06G0524900	LOC_Os06g33360	RGH1A, putative, expressed	6	19437286	C	T	missense_variant	MODERATE
OS06G0524900	LOC_Os06g33360	RGH1A, putative, expressed	6	19437296	C	T	missense_variant	MODERATE
OS06G0557400	LOC_Os06g36310	receptor-like protein kinase 5 precursor, putative, expressed	6	21273713	C	G	missense_variant	MODERATE
OS06G0585950	LOC_Os06g38590	receptor-like protein kinase precursor, putative, expressed	6	22865449	C	T	missense_variant	MODERATE
OS06G0585950	LOC_Os06g38590	receptor-like protein kinase precursor, putative, expressed	6	22865454	C	T	missense_variant	MODERATE
OS06G0585950	LOC_Os06g38590	receptor-like protein kinase precursor, putative, expressed	6	22863106	T	G	missense_variant	MODERATE
OS06G0585982	LOC_Os06g38650	receptor-like protein kinase precursor, putative, expressed	6	22953022	A	C	missense_variant	MODERATE
OS06G0585982	LOC_Os06g38650	receptor-like protein kinase precursor, putative, expressed	6	22953076	G	A	missense_variant	MODERATE
OS06G0587000	LOC_Os06g38730	receptor-like protein kinase precursor, putative, expressed	6	22992746	C	G	missense_variant	MODERATE
OS06G0587000	LOC_Os06g38730	receptor-like protein kinase precursor, putative, expressed	6	22992747	A	T	missense_variant	MODERATE
OS06G0587000	LOC_Os06g38730	receptor-like protein kinase precursor, putative, expressed	6	22993207	C	A	missense_variant	MODERATE
OS06G0587000	LOC_Os06g38730	receptor-like protein kinase precursor, putative, expressed	6	22993215	A	T	missense_variant	MODERATE
OS06G0587000	LOC_Os06g38730	receptor-like protein kinase precursor, putative, expressed	6	22993225	A	C	missense_variant	MODERATE
OS06G0587000	LOC_Os06g38730	receptor-like protein kinase precursor, putative, expressed	6	22993246	A	G	missense_variant	MODERATE
OS06G0587000	LOC_Os06g38730	receptor-like protein kinase precursor, putative, expressed	6	22993258	C	A	missense_variant	MODERATE
OS06G0587000	LOC_Os06g38730	receptor-like protein kinase precursor, putative, expressed	6	22993267	A	C	missense_variant	MODERATE
OS06G0587000	LOC_Os06g38730	receptor-like protein kinase precursor, putative, expressed	6	22993281	C	T	missense_variant	MODERATE
OS06G0587000	LOC_Os06g38730	receptor-like protein kinase precursor, putative, expressed	6	22993285	T	C	missense_variant	MODERATE
OS06G0587000	LOC_Os06g38730	receptor-like protein kinase precursor, putative, expressed	6	22993318	A	T	missense_variant	MODERATE
OS06G0587900	LOC_Os06g38830	receptor-like protein kinase precursor, putative, expressed	6	23050116	T	C	missense_variant	MODERATE
OS06G0587900	LOC_Os06g38830	receptor-like protein kinase precursor, putative, expressed	6	23050122	G	A	missense_variant	MODERATE
OS06G0587900	LOC_Os06g38830	receptor-like protein kinase precursor, putative, expressed	6	23050495	T	C	missense_variant	MODERATE
OS06G0587900	LOC_Os06g38830	receptor-like protein kinase precursor, putative, expressed	6	23050509	C	A	missense_variant	MODERATE
OS06G0587900	LOC_Os06g38830	receptor-like protein kinase precursor, putative, expressed	6	23050528	C	G	missense_variant	MODERATE
OS06G0587900	LOC_Os06g38830	receptor-like protein kinase precursor, putative, expressed	6	23050539	C	T	missense_variant	MODERATE
OS06G0587900	LOC_Os06g38830	receptor-like protein kinase precursor, putative, expressed	6	23050542	C	T	missense_variant	MODERATE
OS06G0587900	LOC_Os06g38830	receptor-like protein kinase precursor, putative, expressed	6	23050543	T	G	missense_variant	MODERATE
OS06G0587900	LOC_Os06g38830	receptor-like protein kinase precursor, putative, expressed	6	23050575	T	A	missense_variant	MODERATE
OS06G0587900	LOC_Os06g38830	receptor-like protein kinase precursor, putative, expressed	6	23050576	T	A	missense_variant	MODERATE
OS06G0587900	LOC_Os06g38830	receptor-like protein kinase precursor, putative, expressed	6	23050600	T	C	missense_variant	MODERATE
OS06G0587900	LOC_Os06g38830	receptor-like protein kinase precursor, putative, expressed	6	23050612	G	T	missense_variant	MODERATE
OS06G0587900	LOC_Os06g38830	receptor-like protein kinase precursor, putative, expressed	6	23050626	G	A	missense_variant	MODERATE
OS06G0587900	LOC_Os06g38830	receptor-like protein kinase precursor, putative, expressed	6	23050645	T	G	missense_variant	MODERATE
OS06G0587900	LOC_Os06g38830	receptor-like protein kinase precursor, putative, expressed	6	23050720	G	T	missense_variant	MODERATE
OS06G0587900	LOC_Os06g38830	receptor-like protein kinase precursor, putative, expressed	6	23050726	T	G	missense_variant	MODERATE
OS06G0587900	LOC_Os06g38830	receptor-like protein kinase precursor, putative, expressed	6	23050741	G	C	missense_variant	MODERATE
OS06G0587900	LOC_Os06g38830	receptor-like protein kinase precursor, putative, expressed	6	23050749	C	T	missense_variant	MODERATE
OS06G0587900	LOC_Os06g38830	receptor-like protein kinase precursor, putative, expressed	6	23050757	T	G	missense_variant	MODERATE
OS06G0587900	LOC_Os06g38830	receptor-like protein kinase precursor, putative, expressed	6	23050760	C	G	missense_variant	MODERATE
OS06G0587900	LOC_Os06g38830	receptor-like protein kinase precursor, putative, expressed	6	23050812	A	C	missense_variant	MODERATE
OS06G0587900	LOC_Os06g38830	receptor-like protein kinase precursor, putative, expressed	6	23050816	G	C	missense_variant	MODERATE
OS06G0587900	LOC_Os06g38830	receptor-like protein kinase precursor, putative, expressed	6	23050824	G	T	missense_variant	MODERATE
OS06G0587900	LOC_Os06g38830	receptor-like protein kinase precursor, putative, expressed	6	23050833	T	C	missense_variant	MODERATE
OS06G0587900	LOC_Os06g38830	receptor-like protein kinase precursor, putative, expressed	6	23050898	T	G	missense_variant	MODERATE
OS06G0587900	LOC_Os06g38830	receptor-like protein kinase precursor, putative, expressed	6	23050903	T	A	missense_variant	MODERATE
OS06G0587900	LOC_Os06g38830	receptor-like protein kinase precursor, putative, expressed	6	23050906	T	A	missense_variant	MODERATE
OS06G0587900	LOC_Os06g38830	receptor-like protein kinase precursor, putative, expressed	6	23050908	A	G	missense_variant	MODERATE
OS06G0587900	LOC_Os06g38830	receptor-like protein kinase precursor, putative, expressed	6	23051523	C	T	missense_variant	MODERATE
OS06G0587900	LOC_Os06g38830	receptor-like protein kinase precursor, putative, expressed	6	23051548	T	G	missense_variant	MODERATE
OS06G0587900	LOC_Os06g38830	receptor-like protein kinase precursor, putative, expressed	6	23051571	A	T	missense_variant	MODERATE
OS06G0587900	LOC_Os06g38830	receptor-like protein kinase precursor, putative, expressed	6	23051617	C	A	missense_variant	MODERATE
OS06G0587900	LOC_Os06g38830	receptor-like protein kinase precursor, putative, expressed	6	23051645	G	C	missense_variant	MODERATE
OS06G0587900	LOC_Os06g38830	receptor-like protein kinase precursor, putative, expressed	6	23051661	C	G	missense_variant	MODERATE
OS06G0587900	LOC_Os06g38830	receptor-like protein kinase precursor, putative, expressed	6	23051668	T	G	missense_variant	MODERATE
OS06G0587900	LOC_Os06g38830	receptor-like protein kinase precursor, putative, expressed	6	23051696	G	T	missense_variant	MODERATE
OS06G0587900	LOC_Os06g38830	receptor-like protein kinase precursor, putative, expressed	6	23051739	T	C	missense_variant	MODERATE
OS06G0587900	LOC_Os06g38830	receptor-like protein kinase precursor, putative, expressed	6	23051812	A	T	missense_variant	MODERATE
OS06G0587900	LOC_Os06g38830	receptor-like protein kinase precursor, putative, expressed	6	23051929	T	A	missense_variant	MODERATE
OS06G0587900	LOC_Os06g38830	receptor-like protein kinase precursor, putative, expressed	6	23051935	G	C	missense_variant	MODERATE
OS06G0587900	LOC_Os06g38830	receptor-like protein kinase precursor, putative, expressed	6	23051950	T	A	missense_variant	MODERATE
OS06G0587900	LOC_Os06g38830	receptor-like protein kinase precursor, putative, expressed	6	23051974	T	C	missense_variant	MODERATE
OS06G0587900	LOC_Os06g38830	receptor-like protein kinase precursor, putative, expressed	6	23052006	G	T	missense_variant	MODERATE
OS06G0587900	LOC_Os06g38830	receptor-like protein kinase precursor, putative, expressed	6	23052011	T	C	missense_variant	MODERATE
OS06G0587900	LOC_Os06g38830	receptor-like protein kinase precursor, putative, expressed	6	23052030	G	A	missense_variant	MODERATE
OS06G0587900	LOC_Os06g38830	receptor-like protein kinase precursor, putative, expressed	6	23050639	C	CAG	frameshift_variant	HIGH
OS06G0587900	LOC_Os06g38830	receptor-like protein kinase precursor, putative, expressed	6	23050641	GAA	G	frameshift_variant	HIGH
OS06G0587900	LOC_Os06g38830	receptor-like protein kinase precursor, putative, expressed	6	23050759	T	A	stop_gained	HIGH
OS06G0587900	LOC_Os06g38830	receptor-like protein kinase precursor, putative, expressed	6	23050885	A	AAC	frameshift_variant	HIGH
OS06G0587900	LOC_Os06g38830	receptor-like protein kinase precursor, putative, expressed	6	23050886	TTG	T	frameshift_variant	HIGH
OS06G0587900	LOC_Os06g38830	receptor-like protein kinase precursor, putative, expressed	6	23051724	A	ATG	frameshift_variant	HIGH
OS06G0587900	LOC_Os06g38830	receptor-like protein kinase precursor, putative, expressed	6	23051726	TAC	T	frameshift_variant	HIGH
OS06G0587900	LOC_Os06g38830	receptor-like protein kinase precursor, putative, expressed	6	23051731	C	CAT	frameshift_variant	HIGH
OS06G0587900	LOC_Os06g38830	receptor-like protein kinase precursor, putative, expressed	6	23051733	TGA	T	frameshift_variant	HIGH
OS06G0587900	LOC_Os06g38830	receptor-like protein kinase precursor, putative, expressed	6	23049695	C	T	missense_variant	MODERATE
OS06G0587900	LOC_Os06g38830	receptor-like protein kinase precursor, putative, expressed	6	23049720	C	G	missense_variant	MODERATE
OS06G0587900	LOC_Os06g38830	receptor-like protein kinase precursor, putative, expressed	6	23050092	T	G	missense_variant	MODERATE
OS06G0587900	LOC_Os06g38830	receptor-like protein kinase precursor, putative, expressed	6	23050699	C	T	missense_variant	MODERATE
OS06G0619000	LOC_Os06g41480	vrga1, putative, expressed	6	24868419	G	T	missense_variant	MODERATE
OS06G0619000	LOC_Os06g41480	vrga1, putative, expressed	6	24869667	C	T	missense_variant	MODERATE
OS06G0620200	LOC_Os06g41560	receptor-like protein kinase, putative, expressed	6	24907879	G	C	missense_variant	MODERATE
OS06G0620200	LOC_Os06g41560	receptor-like protein kinase, putative, expressed	6	24907881	T	C	missense_variant	MODERATE
OS06G0620200	LOC_Os06g41560	receptor-like protein kinase, putative, expressed	6	24907883	C	CGG	frameshift_variant	HIGH
OS06G0620200	LOC_Os06g41560	receptor-like protein kinase, putative, expressed	6	24907885	CCT	C	frameshift_variant	HIGH
OS06G0690200	LOC_Os06g47530	TKL_IRAK_DUF26-lh.6 - DUF26 kinases have homology to DUF26 containing loci, expressed	6	28774173	A	G	missense_variant	MODERATE
OS06G0690200	LOC_Os06g47530	TKL_IRAK_DUF26-lh.6 - DUF26 kinases have homology to DUF26 containing loci, expressed	6	28774233	G	A	missense_variant	MODERATE
OS06G0693100	LOC_Os06g47800	disease resistance protein RGA3, putative, expressed	6	28928828	T	C	missense_variant	MODERATE
OS07G0116800	LOC_Os07g02560	NB-ARC domain containing protein, expressed	7	920861	G	T	missense_variant	MODERATE
OS07G0116800	LOC_Os07g02560	NB-ARC domain containing protein, expressed	7	920910	G	A	missense_variant	MODERATE
OS07G0116800	LOC_Os07g02560	NB-ARC domain containing protein, expressed	7	920919	C	A	missense_variant	MODERATE
OS07G0116800	LOC_Os07g02560	NB-ARC domain containing protein, expressed	7	920940	A	G	missense_variant	MODERATE
OS07G0116800	LOC_Os07g02560	NB-ARC domain containing protein, expressed	7	920944	A	T	missense_variant	MODERATE
OS07G0116800	LOC_Os07g02560	NB-ARC domain containing protein, expressed	7	921006	G	T	missense_variant	MODERATE
OS07G0116800	LOC_Os07g02560	NB-ARC domain containing protein, expressed	7	921045	C	A	missense_variant	MODERATE
OS07G0116800	LOC_Os07g02560	NB-ARC domain containing protein, expressed	7	921051	A	T	missense_variant	MODERATE
OS07G0116900	LOC_Os07g02570	NB-ARC domain containing protein, expressed	7	926356	C	A	missense_variant	MODERATE
OS07G0116900	LOC_Os07g02570	NB-ARC domain containing protein, expressed	7	926490	C	T	missense_variant	MODERATE
OS07G0116900	LOC_Os07g02570	NB-ARC domain containing protein, expressed	7	926510	C	A	missense_variant	MODERATE
OS07G0116900	LOC_Os07g02570	NB-ARC domain containing protein, expressed	7	926585	C	T	missense_variant	MODERATE
OS07G0116900	LOC_Os07g02570	NB-ARC domain containing protein, expressed	7	926149	C	G	missense_variant	MODERATE
OS07G0117000	LOC_Os07g02590	expressed protein	7	928948	C	T	missense_variant	MODERATE
OS07G0117000	LOC_Os07g02590	expressed protein	7	929286	A	G	missense_variant	MODERATE
OS07G0117000	LOC_Os07g02590	expressed protein	7	929344	T	A	missense_variant	MODERATE
OS07G0117000	LOC_Os07g02590	expressed protein	7	929432	C	T	missense_variant	MODERATE
OS07G0117000	LOC_Os07g02590	expressed protein	7	928819	C	CT	frameshift_variant	HIGH
OS07G0117000	LOC_Os07g02590	expressed protein	7	929033	G	GT	frameshift_variant	HIGH
OS07G0117000	LOC_Os07g02590	expressed protein	7	931118	G	A	missense_variant	MODERATE
OS07G0186200	LOC_Os07g08860	S-domain receptor-like protein kinase, putative, expressed	7	4593347	A	T	missense_variant	MODERATE
OS07G0191700	LOC_Os07g09400	RNA ligase isoform 1, putative, expressed	7	4962263	G	A	missense_variant	MODERATE
OS07G0273700	LOC_Os07g17230	WRKY123, expressed	7	10157280	A	G	missense_variant	MODERATE
OS07G0273700	LOC_Os07g17230	WRKY123, expressed	7	10157307	T	A	missense_variant	MODERATE
OS07G0273700	LOC_Os07g17230	WRKY123, expressed	7	10157317	C	A	missense_variant	MODERATE
OS07G0273700	LOC_Os07g17230	WRKY123, expressed	7	10157324	T	G	missense_variant	MODERATE
OS07G0273700	LOC_Os07g17230	WRKY123, expressed	7	10157329	C	G	missense_variant	MODERATE
OS07G0273700	LOC_Os07g17230	WRKY123, expressed	7	10157331	T	G	missense_variant	MODERATE
OS07G0273700	LOC_Os07g17230	WRKY123, expressed	7	10157335	C	A	missense_variant	MODERATE
OS07G0413700	LOC_Os07g23110	poly synthetase 1, putative, expressed	7	13035525	G	A	missense_variant	MODERATE
OS07G0438500	LOC_Os07g25680	protein kinase domain containing protein, expressed	7	14724620	C	G	missense_variant	MODERATE
OS07G0476200	LOC_Os07g29360	tetratricopeptide repeat domain containing protein, expressed	7	17231435	C	T	missense_variant	MODERATE
OS07G0521100	LOC_Os07g33690	NBS-LRR type disease resistance protein Hom-F, putative, expressed	7	20131871	C	T	missense_variant	MODERATE
OS07G0521100	LOC_Os07g33690	NBS-LRR type disease resistance protein Hom-F, putative, expressed	7	20131874	C	A	missense_variant	MODERATE
OS07G0521300	LOC_Os07g33710	expressed protein	7	20152723	ACCAC	A,AATCCCAC	conservative_inframe_insertion	MODERATE
OS07G0521300	LOC_Os07g33710	expressed protein	7	20152723	ACCAC	A,AATCCCAC	frameshift_variant	HIGH
OS07G0522500	LOC_Os07g33780	pleiotropic drug resistance protein 5, putative, expressed	7	20218343	T	G	missense_variant	MODERATE
OS07G0522600	LOC_Os07g33790	glutamate receptor 3.4 precursor, putative, expressed	7	20222913	G	T	missense_variant	MODERATE
OS07G0534500	LOC_Os07g34980	TKL_IRAK_DUF26-lh.9 - DUF26 kinases have homology to DUF26 containing loci, expressed	7	20959182	A	G	missense_variant	MODERATE
OS07G0537200	LOC_Os07g35280	TKL_IRAK_DUF26-lc.1 - DUF26 kinases have homology to DUF26 containing loci, expressed	7	21116872	C	CGCG	conservative_inframe_insertion	MODERATE
OS07G0537400	LOC_Os07g35300	TKL_IRAK_DUF26-lc.11 - DUF26 kinases have homology to DUF26 containing loci, expressed	7	21131162	C	T	stop_gained	HIGH
OS07G0537400	LOC_Os07g35300	TKL_IRAK_DUF26-lc.11 - DUF26 kinases have homology to DUF26 containing loci, expressed	7	21131147	T	A	missense_variant	MODERATE
OS07G0537400	LOC_Os07g35300	TKL_IRAK_DUF26-lc.11 - DUF26 kinases have homology to DUF26 containing loci, expressed	7	21131150	A	ATGCTCT	disruptive_inframe_insertion	MODERATE
OS07G0537400	LOC_Os07g35300	TKL_IRAK_DUF26-lc.11 - DUF26 kinases have homology to DUF26 containing loci, expressed	7	21131157	A	G	missense_variant	MODERATE
OS07G0537500	LOC_Os07g35310	TKL_IRAK_DUF26-lc.12 - DUF26 kinases have homology to DUF26 containing loci, expressed	7	21139864	A	G	missense_variant	MODERATE
OS07G0541400	LOC_Os07g35690	TKL_IRAK_DUF26-lc.3 - DUF26 kinases have homology to DUF26 containing loci, expressed	7	21380254	TTTGA	T	frameshift_variant	HIGH
OS07G0541800	LOC_Os07g35740	TKL_IRAK_DUF26-ld.2 - DUF26 kinases have homology to DUF26 containing loci, expressed	7	21409287	C	T	missense_variant	MODERATE
OS07G0541800	LOC_Os07g35740	TKL_IRAK_DUF26-ld.2 - DUF26 kinases have homology to DUF26 containing loci, expressed	7	21409289	T	G	missense_variant	MODERATE
OS07G0541800	LOC_Os07g35740	TKL_IRAK_DUF26-ld.2 - DUF26 kinases have homology to DUF26 containing loci, expressed	7	21409291	C	A	missense_variant	MODERATE
OS07G0541800	LOC_Os07g35740	TKL_IRAK_DUF26-ld.2 - DUF26 kinases have homology to DUF26 containing loci, expressed	7	21409319	C	T	missense_variant	MODERATE
OS07G0541800	LOC_Os07g35740	TKL_IRAK_DUF26-ld.2 - DUF26 kinases have homology to DUF26 containing loci, expressed	7	21409324	T	C	missense_variant	MODERATE
OS07G0541800	LOC_Os07g35740	TKL_IRAK_DUF26-ld.2 - DUF26 kinases have homology to DUF26 containing loci, expressed	7	21409335	C	A	missense_variant	MODERATE
OS07G0541800	LOC_Os07g35740	TKL_IRAK_DUF26-ld.2 - DUF26 kinases have homology to DUF26 containing loci, expressed	7	21409376	C	G	missense_variant	MODERATE
OS07G0541800	LOC_Os07g35740	TKL_IRAK_DUF26-ld.2 - DUF26 kinases have homology to DUF26 containing loci, expressed	7	21409381	T	C	missense_variant	MODERATE
OS07G0541900	LOC_Os07g35750	TKL_IRAK_DUF26-ld.3 - DUF26 kinases have homology to DUF26 containing loci, expressed	7	21414813	G	A	missense_variant	MODERATE
OS07G0541900	LOC_Os07g35750	TKL_IRAK_DUF26-ld.3 - DUF26 kinases have homology to DUF26 containing loci, expressed	7	21415315	C	CA	frameshift_variant	HIGH
OS07G0542400	LOC_Os07g35790	TKL_IRAK_DUF26-ld.5 - DUF26 kinases have homology to DUF26 containing loci, expressed	7	21437230	T	A	missense_variant	MODERATE
OS07G0542600	LOC_Os07g35810	TKL_IRAK_DUF26-ld.6 - DUF26 kinases have homology to DUF26 containing loci, expressed	7	21441223	C	T	missense_variant	MODERATE
OS07G0542600	LOC_Os07g35810	TKL_IRAK_DUF26-ld.6 - DUF26 kinases have homology to DUF26 containing loci, expressed	7	21441247	C	T	missense_variant	MODERATE
OS07G0542600	LOC_Os07g35810	TKL_IRAK_DUF26-ld.6 - DUF26 kinases have homology to DUF26 containing loci, expressed	7	21441265	C	T	missense_variant	MODERATE
OS07G0542600	LOC_Os07g35810	TKL_IRAK_DUF26-ld.6 - DUF26 kinases have homology to DUF26 containing loci, expressed	7	21441271	T	G	missense_variant	MODERATE
OS07G0542600	LOC_Os07g35810	TKL_IRAK_DUF26-ld.6 - DUF26 kinases have homology to DUF26 containing loci, expressed	7	21441301	T	C	missense_variant	MODERATE
OS07G0542600	LOC_Os07g35810	TKL_IRAK_DUF26-ld.6 - DUF26 kinases have homology to DUF26 containing loci, expressed	7	21441304	T	A	missense_variant	MODERATE
OS07G0542600	LOC_Os07g35810	TKL_IRAK_DUF26-ld.6 - DUF26 kinases have homology to DUF26 containing loci, expressed	7	21441313	C	T	missense_variant	MODERATE
OS07G0542600	LOC_Os07g35810	TKL_IRAK_DUF26-ld.6 - DUF26 kinases have homology to DUF26 containing loci, expressed	7	21441959	C	T	missense_variant	MODERATE
OS07G0542600	LOC_Os07g35810	TKL_IRAK_DUF26-ld.6 - DUF26 kinases have homology to DUF26 containing loci, expressed	7	21443626	T	A	missense_variant&splice_region_variant	MODERATE
OS07G0542600	LOC_Os07g35810	TKL_IRAK_DUF26-ld.6 - DUF26 kinases have homology to DUF26 containing loci, expressed	7	21443661	A	C	missense_variant	MODERATE
OS07G0542600	LOC_Os07g35810	TKL_IRAK_DUF26-ld.6 - DUF26 kinases have homology to DUF26 containing loci, expressed	7	21444073	A	G	missense_variant	MODERATE
OS07G0542600	LOC_Os07g35810	TKL_IRAK_DUF26-ld.6 - DUF26 kinases have homology to DUF26 containing loci, expressed	7	21444078	C	A	missense_variant	MODERATE
OS07G0542600	LOC_Os07g35810	TKL_IRAK_DUF26-ld.6 - DUF26 kinases have homology to DUF26 containing loci, expressed	7	21444088	C	A	missense_variant	MODERATE
OS07G0542600	LOC_Os07g35810	TKL_IRAK_DUF26-ld.6 - DUF26 kinases have homology to DUF26 containing loci, expressed	7	21444111	A	T	missense_variant	MODERATE
OS07G0542600	LOC_Os07g35810	TKL_IRAK_DUF26-ld.6 - DUF26 kinases have homology to DUF26 containing loci, expressed	7	21444132	T	A	missense_variant	MODERATE
OS07G0542600	LOC_Os07g35810	TKL_IRAK_DUF26-ld.6 - DUF26 kinases have homology to DUF26 containing loci, expressed	7	21444133	G	T	missense_variant	MODERATE
OS07G0542600	LOC_Os07g35810	TKL_IRAK_DUF26-ld.6 - DUF26 kinases have homology to DUF26 containing loci, expressed	7	21444348	T	C	missense_variant	MODERATE
OS07G0542600	LOC_Os07g35810	TKL_IRAK_DUF26-ld.6 - DUF26 kinases have homology to DUF26 containing loci, expressed	7	21441297	A	C	stop_gained	HIGH
OS07G0542600	LOC_Os07g35810	TKL_IRAK_DUF26-ld.6 - DUF26 kinases have homology to DUF26 containing loci, expressed	7	21444071	G	T	stop_gained	HIGH
OS07G0569800	LOC_Os07g38250	expressed protein	7	22936386	GA	G	frameshift_variant	HIGH
OS07G0626500	LOC_Os07g43350	expressed protein	7	25947332	A	G	missense_variant	MODERATE
OS07G0674300	LOC_Os07g47720	PPR repeat domain containing protein, putative, expressed	7	28503272	A	G	missense_variant	MODERATE
OS07G0674300	LOC_Os07g47720	PPR repeat domain containing protein, putative, expressed	7	28503549	T	C	missense_variant	MODERATE
OS07G0681100	LOC_Os07g48310	inactive receptor kinase At2g26730 precursor, putative, expressed	7	28866079	T	C	missense_variant	MODERATE
OS07G0682700	LOC_Os07g48420	expressed protein	7	28959995	T	C	missense_variant	MODERATE
OS07G0695400	LOC_Os07g49480	KIP1, putative, expressed	7	29635510	A	G	missense_variant	MODERATE
OS07G0695400	LOC_Os07g49480	KIP1, putative, expressed	7	29636167	A	G	missense_variant	MODERATE
OS07G0695400	LOC_Os07g49480	KIP1, putative, expressed	7	29635792	A	G	missense_variant	MODERATE
OS08G0112500	LOC_Os08g02050	protein kinase family protein, putative, expressed	8	666692	T	C	missense_variant	MODERATE
OS08G0124000	LOC_Os08g02996	receptor-like kinase, putative, expressed	8	1311267	C	T	missense_variant	MODERATE
OS08G0124100	LOC_Os08g03002	lectin-like receptor kinase 1, putative, expressed	8	1315037	T	C,A	missense_variant	MODERATE
OS08G0138700	LOC_Os08g04420	tyrosine protein kinase domain containing protein, putative, expressed	8	2159894	T	A	missense_variant	MODERATE
OS08G0174800	LOC_Os08g07774	disease resistance protein RPM1, putative, expressed	8	4357842	G	GCT	frameshift_variant	HIGH
OS08G0174800	LOC_Os08g07774	disease resistance protein RPM1, putative, expressed	8	4357845	ATG	A	frameshift_variant	HIGH
OS08G0174800	LOC_Os08g07774	disease resistance protein RPM1, putative, expressed	8	4357858	G	C	missense_variant	MODERATE
OS08G0190300	LOC_Os08g09110	NB-ARC domain containing protein, expressed	8	5279107	C	G	missense_variant	MODERATE
OS08G0202400	LOC_Os08g10260	NBS-LRR disease resistance protein, putative, expressed	8	5964513	AG	A	frameshift_variant	HIGH
OS08G0202400	LOC_Os08g10260	NBS-LRR disease resistance protein, putative, expressed	8	5964515	AATGGCAAG	A	frameshift_variant	HIGH
OS08G0203300	LOC_Os08g10300	SHR5-receptor-like kinase, putative, expressed	8	6002259	GT	GTAGTAACT,G	frameshift_variant&stop_gained	HIGH
OS08G0203300	LOC_Os08g10300	SHR5-receptor-like kinase, putative, expressed	8	6002335	T	G	stop_lost	HIGH
OS08G0203300	LOC_Os08g10300	SHR5-receptor-like kinase, putative, expressed	8	6002236	G	T	missense_variant	MODERATE
OS08G0203300	LOC_Os08g10300	SHR5-receptor-like kinase, putative, expressed	8	6002258	C	T	missense_variant	MODERATE
OS08G0203300	LOC_Os08g10300	SHR5-receptor-like kinase, putative, expressed	8	6002293	G	A	missense_variant	MODERATE
OS08G0203300	LOC_Os08g10300	SHR5-receptor-like kinase, putative, expressed	8	6002308	G	T	missense_variant	MODERATE
OS08G0203300	LOC_Os08g10300	SHR5-receptor-like kinase, putative, expressed	8	6002333	A	C	missense_variant	MODERATE
OS08G0203600	LOC_Os08g10320	SHR5-receptor-like kinase, putative, expressed	8	6034863	A	C	missense_variant	MODERATE
OS08G0203600	LOC_Os08g10320	SHR5-receptor-like kinase, putative, expressed	8	6034890	C	T	missense_variant	MODERATE
OS08G0236400	LOC_Os08g13870	S-locus lectin protein kinase family protein, putative, expressed	8	8285106	A	T	missense_variant	MODERATE
OS08G0236400	LOC_Os08g13870	S-locus lectin protein kinase family protein, putative, expressed	8	8285120	G	A	missense_variant	MODERATE
OS08G0236400	LOC_Os08g13870	S-locus lectin protein kinase family protein, putative, expressed	8	8285331	A	G	missense_variant	MODERATE
OS08G0248100	LOC_Os08g14990	receptor-like protein kinase 2 precursor, putative, expressed	8	9040946	T	A	missense_variant	MODERATE
OS08G0248100	LOC_Os08g14990	receptor-like protein kinase 2 precursor, putative, expressed	8	9040979	C	T	missense_variant	MODERATE
OS08G0248100	LOC_Os08g14990	receptor-like protein kinase 2 precursor, putative, expressed	8	9040991	T	A	missense_variant	MODERATE
OS08G0248100	LOC_Os08g14990	receptor-like protein kinase 2 precursor, putative, expressed	8	9040992	C	A	missense_variant	MODERATE
OS08G0248100	LOC_Os08g14990	receptor-like protein kinase 2 precursor, putative, expressed	8	9041006	T	A	missense_variant	MODERATE
OS08G0248100	LOC_Os08g14990	receptor-like protein kinase 2 precursor, putative, expressed	8	9041034	A	C	missense_variant	MODERATE
OS08G0248100	LOC_Os08g14990	receptor-like protein kinase 2 precursor, putative, expressed	8	9041045	T	C	missense_variant	MODERATE
OS08G0421800	LOC_Os08g32600	STE_MEKK_ste11_MAP3K.21 - STE kinases include homologs to sterile 7, sterile 11 and sterile 20 from yeast, expressed	8	20187891	G	T	missense_variant	MODERATE
OS08G0446200	LOC_Os08g34640	receptor-like protein kinase precursor, putative, expressed	8	21758038	G	C	missense_variant	MODERATE
OS08G0446200	LOC_Os08g34640	receptor-like protein kinase precursor, putative, expressed	8	21758664	A	T	missense_variant	MODERATE
OS08G0504800	LOC_Os08g39460	AGC_PVPK_like_CDK8.2 - ACG kinases include homologs to PKA, PKG and PKC, expressed	8	24966597	C	T	missense_variant	MODERATE
OS08G0504800	LOC_Os08g39460	AGC_PVPK_like_CDK8.2 - ACG kinases include homologs to PKA, PKG and PKC, expressed	8	24966604	C	T	missense_variant	MODERATE
OS08G0539700	LOC_Os08g42700	resistance protein, putative, expressed	8	26990252	A	G	missense_variant	MODERATE
OS08G0539700	LOC_Os08g42700	resistance protein, putative, expressed	8	26990269	G	T	missense_variant	MODERATE
OS08G0539700	LOC_Os08g42700	resistance protein, putative, expressed	8	26990270	T	C	missense_variant	MODERATE
OS08G0539700	LOC_Os08g42700	resistance protein, putative, expressed	8	26990272	A	G	missense_variant	MODERATE
OS08G0543100	LOC_Os08g43010	disease resistance RPP13-like protein 1, putative, expressed	8	27184619	A	G	missense_variant	MODERATE
OS08G0564100	LOC_Os08g45010	ABC transporter, ATP-binding protein, putative, expressed	8	28252908	TC	T	frameshift_variant	HIGH
OS08G0564100	LOC_Os08g45010	ABC transporter, ATP-binding protein, putative, expressed	8	28252913	GC	G	frameshift_variant	HIGH
OS09G0268100	LOC_Os09g09510	legume lectins beta domain containing protein, expressed	9	5125484	G	A	missense_variant	MODERATE
OS09G0268100	LOC_Os09g09510	legume lectins beta domain containing protein, expressed	9	5126141	A	G	missense_variant	MODERATE
OS09G0332300	LOC_Os09g16290	ABC-2 type transporter, putative, expressed	9	9948559	A	C	missense_variant	MODERATE
OS09G0334800	LOC_Os09g16540	protein kinase, putative, expressed	9	10157020	A	G	missense_variant	MODERATE
OS09G0334800	LOC_Os09g16540	protein kinase, putative, expressed	9	10157067	A	G	missense_variant	MODERATE
OS09G0334800	LOC_Os09g16540	protein kinase, putative, expressed	9	10157083	G	C	missense_variant	MODERATE
OS09G0334800	LOC_Os09g16540	protein kinase, putative, expressed	9	10157133	G	C	missense_variant	MODERATE
OS09G0334800	LOC_Os09g16540	protein kinase, putative, expressed	9	10157173	C	G	missense_variant	MODERATE
OS09G0334800	LOC_Os09g16540	protein kinase, putative, expressed	9	10157265	A	G	missense_variant	MODERATE
OS09G0334800	LOC_Os09g16540	protein kinase, putative, expressed	9	10157269	A	T	missense_variant	MODERATE
OS09G0334800	LOC_Os09g16540	protein kinase, putative, expressed	9	10157179	A	ACGCG	frameshift_variant	HIGH
OS09G0334800	LOC_Os09g16540	protein kinase, putative, expressed	9	10154332	A	G	missense_variant	MODERATE
OS09G0334800	LOC_Os09g16540	protein kinase, putative, expressed	9	10154341	T	C	missense_variant	MODERATE
OS09G0348400	LOC_Os09g17880	senescence-induced receptor-like serine/threonine-protein kinase precursor, putative, expressed	9	10945517	G	A	missense_variant	MODERATE
OS09G0348400	LOC_Os09g17880	senescence-induced receptor-like serine/threonine-protein kinase precursor, putative, expressed	9	10945523	A	G	missense_variant	MODERATE
OS09G0348600	LOC_Os09g17910	expressed protein	9	10965211	G	A	missense_variant	MODERATE
OS09G0348600	LOC_Os09g17910	expressed protein	9	10965214	G	A	missense_variant	MODERATE
OS09G0348600	LOC_Os09g17910	expressed protein	9	10965230	A	G	missense_variant	MODERATE
OS09G0348600	LOC_Os09g17910	expressed protein	9	10965242	C	G	missense_variant	MODERATE
OS09G0348600	LOC_Os09g17910	expressed protein	9	10965247	A	G	missense_variant	MODERATE
OS09G0348600	LOC_Os09g17910	expressed protein	9	10965278	T	G	missense_variant	MODERATE
OS09G0358000	LOC_Os09g19350	expressed protein	9	11576336	G	C	missense_variant	MODERATE
OS09G0358000	LOC_Os09g19350	expressed protein	9	11576414	G	T	missense_variant	MODERATE
OS09G0358000	LOC_Os09g19350	expressed protein	9	11576441	C	T	missense_variant	MODERATE
OS09G0358000	LOC_Os09g19350	expressed protein	9	11576473	T	A,C	missense_variant	MODERATE
OS09G0358000	LOC_Os09g19350	expressed protein	9	11576473	T	A,C	missense_variant	MODERATE
OS09G0358000	LOC_Os09g19350	expressed protein	9	11576482	C	T	missense_variant	MODERATE
OS09G0358000	LOC_Os09g19350	expressed protein	9	11576516	C	T	missense_variant	MODERATE
OS09G0358000	LOC_Os09g19350	expressed protein	9	11576533	C	T	missense_variant	MODERATE
OS09G0358000	LOC_Os09g19350	expressed protein	9	11576540	T	C	missense_variant	MODERATE
OS09G0358000	LOC_Os09g19350	expressed protein	9	11576600	C	T	missense_variant	MODERATE
OS09G0358000	LOC_Os09g19350	expressed protein	9	11576643	T	A	missense_variant	MODERATE
OS09G0365300	LOC_Os09g20030	disease resistance RPP13-like protein 1, putative, expressed	9	11998715	C	CCGG	disruptive_inframe_insertion	MODERATE
OS09G0418000	LOC_Os09g25090	CAMK_KIN1/SNF1/Nim1_like.34 - CAMK includes calcium/calmodulin depedent protein kinases, expressed	9	15009912	A	G	missense_variant	MODERATE
OS09G0515100	LOC_Os09g33980	bromodomain protein 103, putative, expressed	9	20061979	A	AGG	frameshift_variant	HIGH
OS09G0515100	LOC_Os09g33980	bromodomain protein 103, putative, expressed	9	20061980	A	AG	frameshift_variant	HIGH
OS09G0517200	LOC_Os09g34160	resistance protein, putative, expressed	9	20164117	A	C	missense_variant	MODERATE
OS09G0561000	LOC_Os09g38800	OsWAK88 - OsWAK pseudogene, expressed	9	22293010	C	CA	frameshift_variant	HIGH
OS09G0561000	LOC_Os09g38800	OsWAK88 - OsWAK pseudogene, expressed	9	22293015	AT	A	frameshift_variant	HIGH
OS09G0562600	LOC_Os09g38910	OsWAK92 - OsWAK receptor-like protein kinase, expressed	9	22348866	C	G	missense_variant	MODERATE
OS09G0562600	LOC_Os09g38910	OsWAK92 - OsWAK receptor-like protein kinase, expressed	9	22348953	T	C	missense_variant	MODERATE
OS09G0562600	LOC_Os09g38910	OsWAK92 - OsWAK receptor-like protein kinase, expressed	9	22348872	CG	C	frameshift_variant	HIGH
OS10G0151100	LOC_Os10g06030	OsWAK103 - OsWAK receptor-like protein kinase, expressed	10	3065467	G	C	missense_variant	MODERATE
OS10G0151500	LOC_Os10g06090	OsWAK104 - OsWAK receptor-like protein kinase, expressed	10	3092189	C	G	missense_variant	MODERATE
OS10G0154500	LOC_Os10g06580	cyclin-dependent kinase G-1, putative, expressed	10	3394505	GC	G	frameshift_variant	HIGH
OS10G0154500	LOC_Os10g06580	cyclin-dependent kinase G-1, putative, expressed	10	3394838	T	C	missense_variant	MODERATE
OS10G0161400	LOC_Os10g07400	disease resistance RPP13-like protein 1, putative, expressed	10	3909471	T	C	missense_variant	MODERATE
OS10G0161400	LOC_Os10g07400	disease resistance RPP13-like protein 1, putative, expressed	10	3910026	G	T	missense_variant	MODERATE
OS10G0161400	LOC_Os10g07400	disease resistance RPP13-like protein 1, putative, expressed	10	3910029	T	C	missense_variant	MODERATE
OS10G0161400	LOC_Os10g07400	disease resistance RPP13-like protein 1, putative, expressed	10	3910033	A	C	missense_variant	MODERATE
OS10G0161400	LOC_Os10g07400	disease resistance RPP13-like protein 1, putative, expressed	10	3910058	C	G	missense_variant	MODERATE
OS10G0161400	LOC_Os10g07400	disease resistance RPP13-like protein 1, putative, expressed	10	3910041	T	TGC	frameshift_variant	HIGH
OS10G0161400	LOC_Os10g07400	disease resistance RPP13-like protein 1, putative, expressed	10	3910043	GTA	G	frameshift_variant	HIGH
OS10G0161400	LOC_Os10g07400	disease resistance RPP13-like protein 1, putative, expressed	10	3909215	T	TTCAG	frameshift_variant	HIGH
OS10G0161400	LOC_Os10g07400	disease resistance RPP13-like protein 1, putative, expressed	10	3909219	G	A	stop_gained	HIGH
OS10G0161400	LOC_Os10g07400	disease resistance RPP13-like protein 1, putative, expressed	10	3909220	CTTCG	C	frameshift_variant	HIGH
OS10G0161400	LOC_Os10g07400	disease resistance RPP13-like protein 1, putative, expressed	10	3909201	C	T	missense_variant	MODERATE
OS10G0161400	LOC_Os10g07400	disease resistance RPP13-like protein 1, putative, expressed	10	3909211	C	A	missense_variant	MODERATE
OS10G0161400	LOC_Os10g07400	disease resistance RPP13-like protein 1, putative, expressed	10	3909242	C	T	missense_variant	MODERATE
OS10G0161400	LOC_Os10g07400	disease resistance RPP13-like protein 1, putative, expressed	10	3910552	A	T	missense_variant	MODERATE
OS10G0161400	LOC_Os10g07400	disease resistance RPP13-like protein 1, putative, expressed	10	3910562	T	G	missense_variant	MODERATE
OS10G0161400	LOC_Os10g07400	disease resistance RPP13-like protein 1, putative, expressed	10	3910573	A	C	missense_variant	MODERATE
OS10G0161400	LOC_Os10g07400	disease resistance RPP13-like protein 1, putative, expressed	10	3910590	G	C	missense_variant	MODERATE
OS10G0161400	LOC_Os10g07400	disease resistance RPP13-like protein 1, putative, expressed	10	3910604	A	G	missense_variant	MODERATE
OS10G0161400	LOC_Os10g07400	disease resistance RPP13-like protein 1, putative, expressed	10	3910608	T	G	missense_variant	MODERATE
OS10G0161400	LOC_Os10g07400	disease resistance RPP13-like protein 1, putative, expressed	10	3910614	G	C	missense_variant	MODERATE
OS10G0161400	LOC_Os10g07400	disease resistance RPP13-like protein 1, putative, expressed	10	3910616	T	TCAC	conservative_inframe_insertion	MODERATE
OS10G0161400	LOC_Os10g07400	disease resistance RPP13-like protein 1, putative, expressed	10	3910617	G	C	missense_variant	MODERATE
OS10G0161400	LOC_Os10g07400	disease resistance RPP13-like protein 1, putative, expressed	10	3910622	G	A	missense_variant	MODERATE
OS10G0329300	LOC_Os10g18220	GHMP kinases ATP-binding protein, putative, expressed	10	9259053	T	G	missense_variant	MODERATE
OS10G0329300	LOC_Os10g18220	GHMP kinases ATP-binding protein, putative, expressed	10	9259071	C	G	missense_variant	MODERATE
OS10G0329300	LOC_Os10g18220	GHMP kinases ATP-binding protein, putative, expressed	10	9259077	C	CTGT	disruptive_inframe_insertion	MODERATE
OS10G0329300	LOC_Os10g18220	GHMP kinases ATP-binding protein, putative, expressed	10	9259101	C	A	missense_variant	MODERATE
OS10G0329300	LOC_Os10g18220	GHMP kinases ATP-binding protein, putative, expressed	10	9259128	G	C	missense_variant	MODERATE
OS10G0329300	LOC_Os10g18220	GHMP kinases ATP-binding protein, putative, expressed	10	9259137	G	A	missense_variant	MODERATE
OS10G0329300	LOC_Os10g18220	GHMP kinases ATP-binding protein, putative, expressed	10	9259196	G	A	missense_variant	MODERATE
OS10G0329300	LOC_Os10g18220	GHMP kinases ATP-binding protein, putative, expressed	10	9259202	C	A	missense_variant	MODERATE
OS10G0329300	LOC_Os10g18220	GHMP kinases ATP-binding protein, putative, expressed	10	9260199	T	A	missense_variant	MODERATE
OS10G0329300	LOC_Os10g18220	GHMP kinases ATP-binding protein, putative, expressed	10	9260291	C	G	stop_gained	HIGH
OS10G0329300	LOC_Os10g18220	GHMP kinases ATP-binding protein, putative, expressed	10	9259126	CGG	C	frameshift_variant	HIGH
OS10G0329300	LOC_Os10g18220	GHMP kinases ATP-binding protein, putative, expressed	10	9259132	C	CAG	frameshift_variant	HIGH
OS10G0329300	LOC_Os10g18220	GHMP kinases ATP-binding protein, putative, expressed	10	9258965	G	A	missense_variant	MODERATE
OS10G0329300	LOC_Os10g18220	GHMP kinases ATP-binding protein, putative, expressed	10	9259131	G	A	missense_variant	MODERATE
OS10G0329300	LOC_Os10g18220	GHMP kinases ATP-binding protein, putative, expressed	10	9259496	T	C	missense_variant	MODERATE
OS10G0346600	LOC_Os10g20630	vacuolar-sorting receptor precursor, putative, expressed	10	10412967	G	C	missense_variant	MODERATE
OS10G0374600	LOC_Os10g22860	receptor kinase, putative, expressed	10	11881921	C	T	missense_variant	MODERATE
OS10G0374600	LOC_Os10g22860	receptor kinase, putative, expressed	10	11881924	C	T	missense_variant	MODERATE
OS10G0374600	LOC_Os10g22860	receptor kinase, putative, expressed	10	11882737	G	A	missense_variant	MODERATE
OS10G0374600	LOC_Os10g22860	receptor kinase, putative, expressed	10	11880264	C	A	missense_variant	MODERATE
OS10G0375000	LOC_Os10g22890	receptor-like kinase, putative, expressed	10	11897821	G	C	missense_variant	MODERATE
OS10G0442100	LOC_Os10g30550	tRNA methyltransferase, putative, expressed	10	15889044	C	T	missense_variant	MODERATE
OS10G0468500	LOC_Os10g33040	receptor-like protein kinase precursor, putative, expressed	10	17314599	G	C	missense_variant	MODERATE
OS10G0468800	LOC_Os10g33060	hcr2-5D, putative, expressed	10	17320291	AT	A	frameshift_variant	HIGH
OS10G0468800	LOC_Os10g33060	hcr2-5D, putative, expressed	10	17320272	T	G	missense_variant	MODERATE
OS10G0468800	LOC_Os10g33060	hcr2-5D, putative, expressed	10	17320673	T	A	missense_variant	MODERATE
OS10G0469000	LOC_Os10g33080	leucine-rich repeat receptor protein kinase EXS precursor, putative, expressed	10	17331643	G	A	missense_variant	MODERATE
OS10G0469000	LOC_Os10g33080	leucine-rich repeat receptor protein kinase EXS precursor, putative, expressed	10	17332469	T	C	missense_variant	MODERATE
OS10G0489900	LOC_Os10g34820	CDT1B - Putative DNA replication initiation protein, expressed	10	18592432	G	A	missense_variant	MODERATE
OS10G0533150	LOC_Os10g38920	protein kinase domain containing protein, expressed	10	20732704	C	CGCT	conservative_inframe_insertion	MODERATE
OS11G0102900	LOC_Os11g01200	senescence-induced receptor-like serine/threonine-protein kinase precursor, putative, expressed	11	118503	T	C	missense_variant	MODERATE
OS11G0102900	LOC_Os11g01200	senescence-induced receptor-like serine/threonine-protein kinase precursor, putative, expressed	11	118512	C	A	missense_variant	MODERATE
OS11G0102900	LOC_Os11g01200	senescence-induced receptor-like serine/threonine-protein kinase precursor, putative, expressed	11	118514	T	G	missense_variant	MODERATE
OS11G0121500	LOC_Os11g02840	protein kinase, putative, expressed	11	959953	A	C	missense_variant	MODERATE
OS11G0148500	LOC_Os11g05110	pyruvate kinase, putative, expressed	11	2242566	G	A	stop_gained	HIGH
OS11G0148500	LOC_Os11g05110	pyruvate kinase, putative, expressed	11	2242576	AG	A	frameshift_variant	HIGH
OS11G0148500	LOC_Os11g05110	pyruvate kinase, putative, expressed	11	2242326	C	A	missense_variant	MODERATE
OS11G0148500	LOC_Os11g05110	pyruvate kinase, putative, expressed	11	2242329	G	A	missense_variant	MODERATE
OS11G0148500	LOC_Os11g05110	pyruvate kinase, putative, expressed	11	2242336	G	C	missense_variant	MODERATE
OS11G0148500	LOC_Os11g05110	pyruvate kinase, putative, expressed	11	2242338	G	A	missense_variant&splice_region_variant	MODERATE
OS11G0148500	LOC_Os11g05110	pyruvate kinase, putative, expressed	11	2242516	C	A	missense_variant&splice_region_variant	MODERATE
OS11G0148500	LOC_Os11g05110	pyruvate kinase, putative, expressed	11	2242584	GAAC	G	conservative_inframe_deletion	MODERATE
OS11G0153700	LOC_Os11g05556	signal recognition particle 54 kDa protein, putative, expressed	11	2517604	G	A	missense_variant	MODERATE
OS11G0153700	LOC_Os11g05556	signal recognition particle 54 kDa protein, putative, expressed	11	2518472	C	G	missense_variant	MODERATE
OS11G0153700	LOC_Os11g05556	signal recognition particle 54 kDa protein, putative, expressed	11	2518537	G	T	missense_variant	MODERATE
OS11G0153700	LOC_Os11g05556	signal recognition particle 54 kDa protein, putative, expressed	11	2519361	G	A	missense_variant	MODERATE
OS11G0172150	LOC_Os11g07100	receptor-like protein kinase precursor, putative, expressed	11	3536858	T	C	missense_variant	MODERATE
OS11G0191400	LOC_Os11g08670	NAD kinase, putative, expressed	11	4626493	T	G	missense_variant	MODERATE
OS11G0191400	LOC_Os11g08670	NAD kinase, putative, expressed	11	4626500	G	A	missense_variant	MODERATE
OS11G0208700	LOC_Os11g10280	receptor-like protein kinase, putative, expressed	11	5581415	A	G	missense_variant	MODERATE
OS11G0208800	LOC_Os11g10290	S-domain receptor-like protein kinase, putative, expressed	11	5588996	A	G	missense_variant	MODERATE
OS11G0212300	LOC_Os11g10640	protein kinase domain containing protein, expressed	11	5839795	A	C	splice_donor_variant&intron_variant	HIGH
OS11G0212300	LOC_Os11g10640	protein kinase domain containing protein, expressed	11	5839252	A	T	missense_variant	MODERATE
OS11G0212300	LOC_Os11g10640	protein kinase domain containing protein, expressed	11	5839292	A	G	missense_variant	MODERATE
OS11G0212300	LOC_Os11g10640	protein kinase domain containing protein, expressed	11	5839827	G	A	missense_variant	MODERATE
OS11G0213700	LOC_Os11g10760	NBS-LRR disease resistance protein, putative, expressed	11	5910890	C	T	missense_variant	MODERATE
OS11G0213700	LOC_Os11g10760	NBS-LRR disease resistance protein, putative, expressed	11	5911508	C	T	missense_variant	MODERATE
OS11G0213700	LOC_Os11g10760	NBS-LRR disease resistance protein, putative, expressed	11	5911509	T	G	missense_variant	MODERATE
OS11G0213700	LOC_Os11g10760	NBS-LRR disease resistance protein, putative, expressed	11	5911512	A	C	missense_variant	MODERATE
OS11G0225000	LOC_Os11g11780	cysteine-rich receptor-like protein kinase 21 precursor, putative, expressed	11	6540756	C	T	missense_variant	MODERATE
OS11G0226933	LOC_Os11g11960	disease resistance protein RPM1, putative, expressed	11	6638551	C	G	missense_variant	MODERATE
OS11G0226933	LOC_Os11g11960	disease resistance protein RPM1, putative, expressed	11	6638552	A	G	missense_variant	MODERATE
OS11G0226933	LOC_Os11g11960	disease resistance protein RPM1, putative, expressed	11	6638625	G	T	missense_variant	MODERATE
OS11G0226933	LOC_Os11g11960	disease resistance protein RPM1, putative, expressed	11	6638627	C	T	missense_variant	MODERATE
OS11G0226933	LOC_Os11g11960	disease resistance protein RPM1, putative, expressed	11	6639282	T	C	missense_variant	MODERATE
OS11G0226933	LOC_Os11g11960	disease resistance protein RPM1, putative, expressed	11	6639310	C	G	missense_variant	MODERATE
OS11G0227100	LOC_Os11g11990	NB-ARC domain containing protein, expressed	11	6657328	T	A	stop_gained	HIGH
OS11G0227100	LOC_Os11g11990	NB-ARC domain containing protein, expressed	11	6657183	A	C	missense_variant	MODERATE
OS11G0227100	LOC_Os11g11990	NB-ARC domain containing protein, expressed	11	6657186	A	G	missense_variant	MODERATE
OS11G0227100	LOC_Os11g11990	NB-ARC domain containing protein, expressed	11	6657264	T	C	missense_variant	MODERATE
OS11G0227100	LOC_Os11g11990	NB-ARC domain containing protein, expressed	11	6657340	A	G	missense_variant	MODERATE
OS11G0227100	LOC_Os11g11990	NB-ARC domain containing protein, expressed	11	6657367	G	A	missense_variant	MODERATE
OS11G0227100	LOC_Os11g11990	NB-ARC domain containing protein, expressed	11	6657405	A	G	missense_variant	MODERATE
OS11G0227100	LOC_Os11g11990	NB-ARC domain containing protein, expressed	11	6657435	A	T	missense_variant	MODERATE
OS11G0227100	LOC_Os11g11990	NB-ARC domain containing protein, expressed	11	6657480	A	G	missense_variant	MODERATE
OS11G0227100	LOC_Os11g11990	NB-ARC domain containing protein, expressed	11	6657518	C	G	missense_variant	MODERATE
OS11G0227100	LOC_Os11g11990	NB-ARC domain containing protein, expressed	11	6657528	G	A	missense_variant	MODERATE
OS11G0227100	LOC_Os11g11990	NB-ARC domain containing protein, expressed	11	6657533	G	T	missense_variant	MODERATE
OS11G0227100	LOC_Os11g11990	NB-ARC domain containing protein, expressed	11	6657537	A	G	missense_variant	MODERATE
OS11G0229300	LOC_Os11g12300	NBS-LRR disease resistance protein, putative, expressed	11	6876357	C	G	missense_variant	MODERATE
OS11G0238000	LOC_Os11g13440	RGH1A, putative, expressed	11	7365713	G	A	missense_variant	MODERATE
OS11G0238000	LOC_Os11g13440	RGH1A, putative, expressed	11	7365722	G	A	missense_variant	MODERATE
OS11G0238000	LOC_Os11g13440	RGH1A, putative, expressed	11	7365484	A	G	missense_variant	MODERATE
OS11G0490200	LOC_Os11g29790	receptor kinase, putative, expressed	11	17292405	A	C	missense_variant	MODERATE
OS11G0490200	LOC_Os11g29790	receptor kinase, putative, expressed	11	17292444	C	A	missense_variant	MODERATE
OS11G0490200	LOC_Os11g29790	receptor kinase, putative, expressed	11	17293227	G	A	missense_variant	MODERATE
OS11G0492100	LOC_Os11g29970	NB-ARC domain containing protein, expressed	11	17417367	T	A	missense_variant	MODERATE
OS11G0492100	LOC_Os11g29970	NB-ARC domain containing protein, expressed	11	17417163	C	CAT	frameshift_variant	HIGH
OS11G0492100	LOC_Os11g29970	NB-ARC domain containing protein, expressed	11	17417164	GGC	G	frameshift_variant	HIGH
OS11G0492100	LOC_Os11g29970	NB-ARC domain containing protein, expressed	11	17417156	C	G	missense_variant	MODERATE
OS11G0492100	LOC_Os11g29970	NB-ARC domain containing protein, expressed	11	17417168	G	C	missense_variant	MODERATE
OS11G0492100	LOC_Os11g29970	NB-ARC domain containing protein, expressed	11	17417180	C	G	missense_variant	MODERATE
OS11G0550100	LOC_Os11g34880	NB-ARC domain containing protein, expressed	11	20449166	A	G	missense_variant	MODERATE
OS11G0550500	LOC_Os11g34920	stripe rust resistance protein Yr10, putative, expressed	11	20461557	G	GTA	splice_donor_variant&intron_variant	HIGH
OS11G0553500	LOC_Os11g35120	OsWAK116 - OsWAK receptor-like cytoplasmic kinase OsWAK-RLCK, expressed	11	20589966	T	G	missense_variant	MODERATE
OS11G0555300	LOC_Os11g35210	NB-ARC domain containing protein, expressed	11	20645556	G	T	missense_variant	MODERATE
OS11G0555300	LOC_Os11g35210	NB-ARC domain containing protein, expressed	11	20645618	C	G	missense_variant	MODERATE
OS11G0555300	LOC_Os11g35210	NB-ARC domain containing protein, expressed	11	20645622	G	T	missense_variant	MODERATE
OS11G0555300	LOC_Os11g35210	NB-ARC domain containing protein, expressed	11	20645654	C	T	missense_variant	MODERATE
OS11G0555300	LOC_Os11g35210	NB-ARC domain containing protein, expressed	11	20646601	T	C	missense_variant	MODERATE
OS11G0555300	LOC_Os11g35210	NB-ARC domain containing protein, expressed	11	20646606	C	A	missense_variant	MODERATE
OS11G0555300	LOC_Os11g35210	NB-ARC domain containing protein, expressed	11	20645613	TA	T	frameshift_variant	HIGH
OS11G0555300	LOC_Os11g35210	NB-ARC domain containing protein, expressed	11	20645623	A	AC	frameshift_variant	HIGH
OS11G0555300	LOC_Os11g35210	NB-ARC domain containing protein, expressed	11	20645642	AT	A	frameshift_variant	HIGH
OS11G0555300	LOC_Os11g35210	NB-ARC domain containing protein, expressed	11	20645645	AC	A	frameshift_variant	HIGH
OS11G0555300	LOC_Os11g35210	NB-ARC domain containing protein, expressed	11	20645649	G	GAATT	frameshift_variant&stop_gained	HIGH
OS11G0555300	LOC_Os11g35210	NB-ARC domain containing protein, expressed	11	20645650	G	GA	frameshift_variant	HIGH
OS11G0555300	LOC_Os11g35210	NB-ARC domain containing protein, expressed	11	20645387	T	A	stop_gained	HIGH
OS11G0555300	LOC_Os11g35210	NB-ARC domain containing protein, expressed	11	20645389	ATG	A	frameshift_variant	HIGH
OS11G0559200	LOC_Os11g35500	receptor-like protein kinase 5 precursor, putative, expressed	11	20804038	C	A	missense_variant	MODERATE
OS11G0559200	LOC_Os11g35500	receptor-like protein kinase 5 precursor, putative, expressed	11	20804115	T	G	missense_variant	MODERATE
OS11G0559200	LOC_Os11g35500	receptor-like protein kinase 5 precursor, putative, expressed	11	20804316	A	G	missense_variant	MODERATE
OS11G0559200	LOC_Os11g35500	receptor-like protein kinase 5 precursor, putative, expressed	11	20804324	T	G	missense_variant	MODERATE
OS11G0559200	LOC_Os11g35500	receptor-like protein kinase 5 precursor, putative, expressed	11	20804328	A	C	missense_variant	MODERATE
OS11G0559200	LOC_Os11g35500	receptor-like protein kinase 5 precursor, putative, expressed	11	20804331	A	C	missense_variant	MODERATE
OS11G0559200	LOC_Os11g35500	receptor-like protein kinase 5 precursor, putative, expressed	11	20804340	C	T	missense_variant	MODERATE
OS11G0559200	LOC_Os11g35500	receptor-like protein kinase 5 precursor, putative, expressed	11	20804353	T	C	missense_variant	MODERATE
OS11G0559200	LOC_Os11g35500	receptor-like protein kinase 5 precursor, putative, expressed	11	20804368	T	A	missense_variant	MODERATE
OS11G0559200	LOC_Os11g35500	receptor-like protein kinase 5 precursor, putative, expressed	11	20804369	T	G	missense_variant	MODERATE
OS11G0559200	LOC_Os11g35500	receptor-like protein kinase 5 precursor, putative, expressed	11	20804383	TTCC	T	disruptive_inframe_deletion	MODERATE
OS11G0559200	LOC_Os11g35500	receptor-like protein kinase 5 precursor, putative, expressed	11	20804388	G	GTCA	disruptive_inframe_insertion	MODERATE
OS11G0559200	LOC_Os11g35500	receptor-like protein kinase 5 precursor, putative, expressed	11	20804400	A	T	missense_variant	MODERATE
OS11G0559200	LOC_Os11g35500	receptor-like protein kinase 5 precursor, putative, expressed	11	20805171	T	G	missense_variant	MODERATE
OS11G0559200	LOC_Os11g35500	receptor-like protein kinase 5 precursor, putative, expressed	11	20805916	A	C	missense_variant	MODERATE
OS11G0559200	LOC_Os11g35500	receptor-like protein kinase 5 precursor, putative, expressed	11	20806035	G	T	missense_variant	MODERATE
OS11G0569500	LOC_Os11g36150	receptor-like protein kinase 2 precursor, putative, expressed	11	21251212	A	AG	frameshift_variant	HIGH
OS11G0569600	LOC_Os11g36160	receptor-like protein kinase 2 precursor, putative, expressed	11	21263186	A	G	missense_variant	MODERATE
OS11G0588400	LOC_Os11g37740	stripe rust resistance protein Yr10, putative, expressed	11	22315581	A	T	missense_variant	MODERATE
OS11G0588400	LOC_Os11g37740	stripe rust resistance protein Yr10, putative, expressed	11	22317821	C	G	missense_variant	MODERATE
OS11G0588400	LOC_Os11g37740	stripe rust resistance protein Yr10, putative, expressed	11	22317831	G	T	missense_variant	MODERATE
OS11G0588400	LOC_Os11g37740	stripe rust resistance protein Yr10, putative, expressed	11	22317834	A	T	missense_variant	MODERATE
OS11G0588400	LOC_Os11g37740	stripe rust resistance protein Yr10, putative, expressed	11	22317837	G	A	missense_variant	MODERATE
OS11G0588400	LOC_Os11g37740	stripe rust resistance protein Yr10, putative, expressed	11	22317849	A	G	missense_variant	MODERATE
OS11G0588400	LOC_Os11g37740	stripe rust resistance protein Yr10, putative, expressed	11	22317853	T	C	missense_variant	MODERATE
OS11G0589800	LOC_Os11g37790	mla, putative, expressed	11	22382402	T	C	missense_variant	MODERATE
OS11G0589800	LOC_Os11g37790	mla, putative, expressed	11	22382405	C	T	missense_variant	MODERATE
OS11G0589800	LOC_Os11g37790	mla, putative, expressed	11	22382413	A	G	missense_variant	MODERATE
OS11G0589800	LOC_Os11g37790	mla, putative, expressed	11	22382421	G	A	missense_variant	MODERATE
OS11G0589800	LOC_Os11g37790	mla, putative, expressed	11	22382468	A	G	missense_variant	MODERATE
OS11G0589800	LOC_Os11g37790	mla, putative, expressed	11	22382512	G	A	missense_variant	MODERATE
OS11G0589800	LOC_Os11g37790	mla, putative, expressed	11	22382514	T	G	missense_variant	MODERATE
OS11G0589800	LOC_Os11g37790	mla, putative, expressed	11	22382523	G	T	missense_variant	MODERATE
OS11G0589800	LOC_Os11g37790	mla, putative, expressed	11	22382629	G	A	missense_variant	MODERATE
OS11G0589800	LOC_Os11g37790	mla, putative, expressed	11	22382415	TAA	T	frameshift_variant	HIGH
OS11G0628000	LOC_Os11g41100	expressed protein	11	24617495	T	G	missense_variant	MODERATE
OS11G0629600	LOC_Os11g41170	disease resistance protein RPM1, putative, expressed	11	24671201	T	G	missense_variant	MODERATE
OS11G0629600	LOC_Os11g41170	disease resistance protein RPM1, putative, expressed	11	24671734	G	A	missense_variant	MODERATE
OS11G0629600	LOC_Os11g41170	disease resistance protein RPM1, putative, expressed	11	24671783	A	G	missense_variant	MODERATE
OS11G0657900	LOC_Os11g43700	RGH1A, putative, expressed	11	26380649	G	GGGA	conservative_inframe_insertion	MODERATE
OS11G0664100	LOC_Os11g44260	expressed protein	11	26751320	A	C	missense_variant	MODERATE
OS11G0666200	LOC_Os11g44430	protein kinase, putative, expressed	11	26879041	T	C	missense_variant	MODERATE
OS11G0666200	LOC_Os11g44430	protein kinase, putative, expressed	11	26879603	C	T	missense_variant	MODERATE
OS11G0666200	LOC_Os11g44430	protein kinase, putative, expressed	11	26879642	G	C	missense_variant	MODERATE
OS11G0666200	LOC_Os11g44430	protein kinase, putative, expressed	11	26879770	T	G	missense_variant	MODERATE
OS11G0666200	LOC_Os11g44430	protein kinase, putative, expressed	11	26879780	A	C	missense_variant	MODERATE
OS11G0666200	LOC_Os11g44430	protein kinase, putative, expressed	11	26879783	A	T	missense_variant	MODERATE
OS11G0666200	LOC_Os11g44430	protein kinase, putative, expressed	11	26879903	C	T	missense_variant	MODERATE
OS11G0666200	LOC_Os11g44430	protein kinase, putative, expressed	11	26879956	G	A	missense_variant	MODERATE
OS11G0667000	LOC_Os11g44500	protein kinase domain containing protein, expressed	11	26916953	A	C	missense_variant	MODERATE
OS11G0668100	LOC_Os11g44580	go35 NBS-LRR, putative, expressed	11	26953553	G	C	missense_variant	MODERATE
OS11G0668100	LOC_Os11g44580	go35 NBS-LRR, putative, expressed	11	26953557	C	A	missense_variant	MODERATE
OS11G0668100	LOC_Os11g44580	go35 NBS-LRR, putative, expressed	11	26953597	C	G	missense_variant	MODERATE
OS11G0668100	LOC_Os11g44580	go35 NBS-LRR, putative, expressed	11	26954349	T	C	missense_variant	MODERATE
OS11G0668100	LOC_Os11g44580	go35 NBS-LRR, putative, expressed	11	26955387	A	C,G	missense_variant	MODERATE
OS11G0668100	LOC_Os11g44580	go35 NBS-LRR, putative, expressed	11	26953704	T	TGA	frameshift_variant	HIGH
OS11G0668100	LOC_Os11g44580	go35 NBS-LRR, putative, expressed	11	26953705	T	TC	frameshift_variant	HIGH
OS11G0668100	LOC_Os11g44580	go35 NBS-LRR, putative, expressed	11	26953686	C	A	missense_variant	MODERATE
OS11G0668100	LOC_Os11g44580	go35 NBS-LRR, putative, expressed	11	26953711	G	A	missense_variant	MODERATE
OS11G0668100	LOC_Os11g44580	go35 NBS-LRR, putative, expressed	11	26953719	C	G	missense_variant	MODERATE
OS11G0668100	LOC_Os11g44580	go35 NBS-LRR, putative, expressed	11	26953732	C	A	missense_variant	MODERATE
OS11G0673900	LOC_Os11g44970	NBS-LRR disease resistance protein, putative, expressed	11	27235036	G	GTT	frameshift_variant	HIGH
OS11G0676800	LOC_Os11g45160	disease resistance protein, putative, expressed	11	27335371	A	C	missense_variant	MODERATE
OS11G0676800	LOC_Os11g45160	disease resistance protein, putative, expressed	11	27337361	G	A	missense_variant	MODERATE
OS12G0102500	LOC_Os12g01200	senescence-induced receptor-like serine/threonine-protein kinase precursor, putative, expressed	12	119480	G	C	missense_variant	MODERATE
OS12G0102500	LOC_Os12g01200	senescence-induced receptor-like serine/threonine-protein kinase precursor, putative, expressed	12	119522	C	T	missense_variant	MODERATE
OS12G0105500	LOC_Os12g01480	phosphatidate cytidylyltransferase, putative, expressed	12	291474	T	G	missense_variant	MODERATE
OS12G0130200	LOC_Os12g03640	S-locus-like receptor protein kinase, putative, expressed	12	1458791	T	C	missense_variant	MODERATE
OS12G0130200	LOC_Os12g03640	S-locus-like receptor protein kinase, putative, expressed	12	1459258	G	T	missense_variant	MODERATE
OS12G0130500	LOC_Os12g03670	D-mannose binding lectin family protein, expressed	12	1474585	A	G	missense_variant	MODERATE
OS12G0130500	LOC_Os12g03670	D-mannose binding lectin family protein, expressed	12	1474598	C	T	missense_variant	MODERATE
OS12G0131701	LOC_Os12g03750	Leucine Rich Repeat family protein, expressed	12	1524274	G	A	missense_variant	MODERATE
OS12G0192500	LOC_Os12g09000	phosphomethylpyrimidine kinase/thiamin-phosphate pyrophosphorylase, putative, expressed	12	4710593	T	C	missense_variant	MODERATE
OS12G0197500	LOC_Os12g09580	leafbladeless1, putative, expressed	12	5038711	T	C	missense_variant	MODERATE
OS12G0197700	LOC_Os12g09590	leafbladeless1, putative, expressed	12	5049404	C	T	missense_variant	MODERATE
OS12G0197700	LOC_Os12g09590	leafbladeless1, putative, expressed	12	5049448	C	T	missense_variant	MODERATE
OS12G0197700	LOC_Os12g09590	leafbladeless1, putative, expressed	12	5049449	A	G	missense_variant	MODERATE
OS12G0198900	LOC_Os12g09710	NBS-LRR disease resistance protein, putative, expressed	12	5128485	T	C	missense_variant	MODERATE
OS12G0204600	LOC_Os12g10330	NB-ARC domain containing protein, expressed	12	5470023	A	T	missense_variant	MODERATE
OS12G0209300	LOC_Os12g10670	AAA-type ATPase family protein, putative, expressed	12	5705471	T	C	missense_variant	MODERATE
OS12G0270300	LOC_Os12g17090	stripe rust resistance protein Yr10, putative, expressed	12	9785083	A	C	missense_variant	MODERATE
OS12G0289600	LOC_Os12g19180	ATP binding protein, putative, expressed	12	11140198	C	A	missense_variant	MODERATE
OS12G0438300	LOC_Os12g25170	NB-ARC domain containing disease resistance protein, putative, expressed	12	14450065	G	A	missense_variant	MODERATE
OS12G0438300	LOC_Os12g25170	NB-ARC domain containing disease resistance protein, putative, expressed	12	14451319	T	C	missense_variant	MODERATE
OS12G0511600	LOC_Os12g32680	NB-ARC domain containing protein, expressed	12	19730706	C	T	missense_variant	MODERATE
OS12G0608500	LOC_Os12g41490	cysteine-rich receptor-like protein kinase 8 precursor, putative, expressed	12	25699999	G	T	missense_variant	MODERATE
OS12G0608500	LOC_Os12g41490	cysteine-rich receptor-like protein kinase 8 precursor, putative, expressed	12	25700000	G	C	missense_variant	MODERATE
OS12G0608500	LOC_Os12g41490	cysteine-rich receptor-like protein kinase 8 precursor, putative, expressed	12	25700003	CCAT	C	conservative_inframe_deletion	MODERATE
OS12G0608500	LOC_Os12g41490	cysteine-rich receptor-like protein kinase 8 precursor, putative, expressed	12	25701158	C	G	missense_variant	MODERATE
OS12G0608900	LOC_Os12g41530	cysteine-rich receptor-like protein kinase 8 precursor, putative, expressed	12	25718998	GTTC	G	conservative_inframe_deletion	MODERATE
OS12G0608900	LOC_Os12g41530	cysteine-rich receptor-like protein kinase 8 precursor, putative, expressed	12	25719003	G	T	missense_variant	MODERATE
OS12G0608900	LOC_Os12g41530	cysteine-rich receptor-like protein kinase 8 precursor, putative, expressed	12	25719133	T	G	missense_variant	MODERATE
OS12G0608900	LOC_Os12g41530	cysteine-rich receptor-like protein kinase 8 precursor, putative, expressed	12	25720449	A	G	missense_variant	MODERATE
OS12G0639400	LOC_Os12g44210	ATPase, AAA family domain containing protein, expressed	12	27423371	C	CACCTTGG	frameshift_variant	HIGH
OS12G0639400	LOC_Os12g44210	ATPase, AAA family domain containing protein, expressed	12	27423374	CAT	C	frameshift_variant	HIGH
OS12G0639400	LOC_Os12g44210	ATPase, AAA family domain containing protein, expressed	12	27423378	GGA	G	frameshift_variant	HIGH
OS12G0639400	LOC_Os12g44210	ATPase, AAA family domain containing protein, expressed	12	27423368	T	C	missense_variant	MODERATE
