# Supplementary figures and images for: Comparative Genomic Analysis of Rice with Contrasting Photosynthesis and Grain Production under Salt Stress
Source: MDPI journal article supplement (doi:10.3390/genes10080562), 2019-07-25

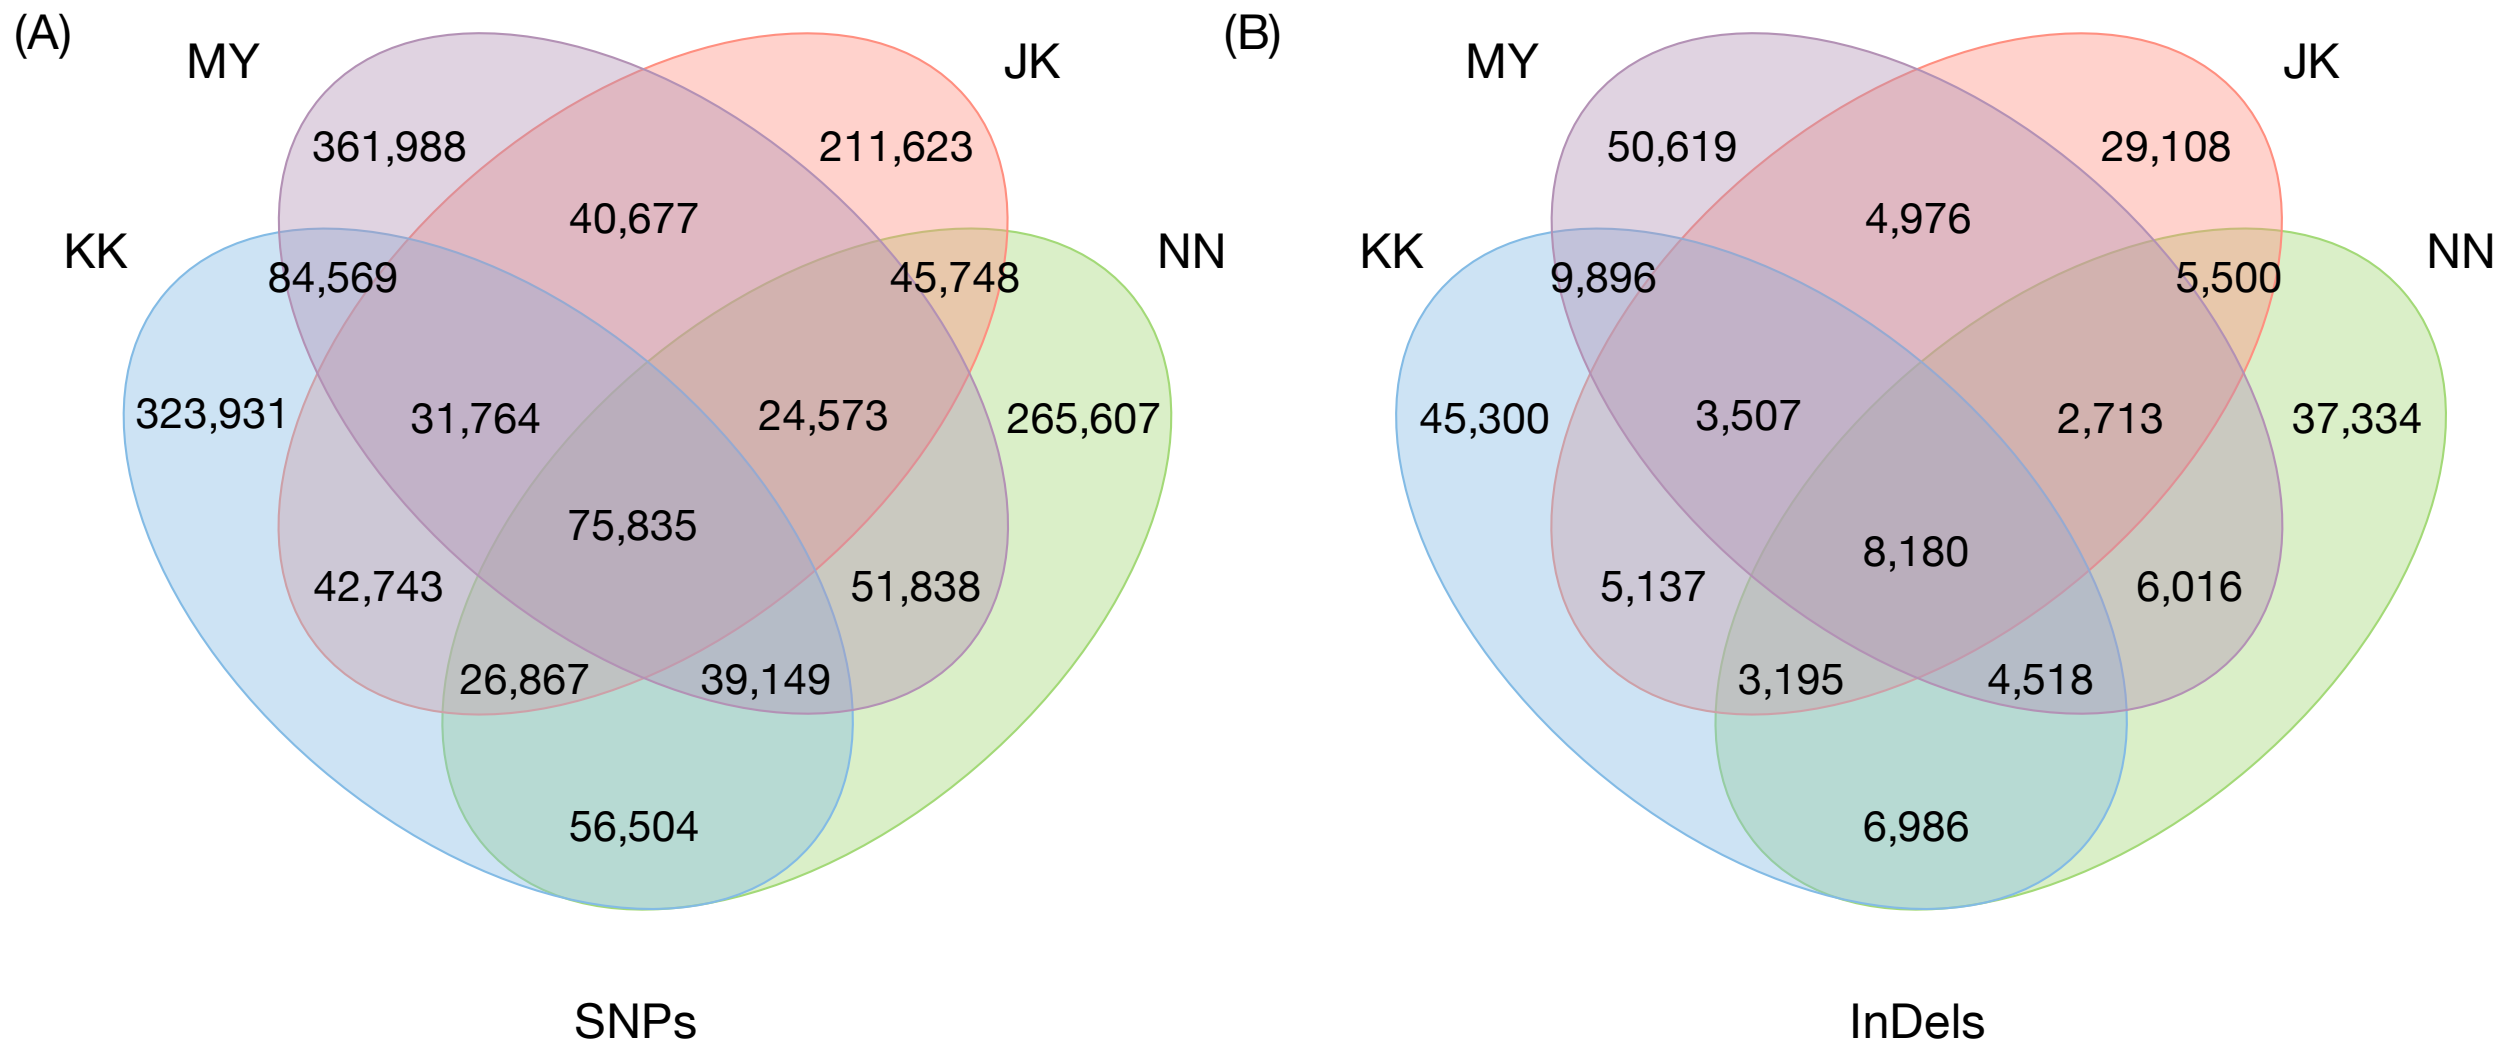

**Fig. S1** Venn diagram showing the number of SNPs (A) and InDels (B) between LYR (MY and KK) and HYR (JK and NN).

Supplement: s1 [file s1]
